# Supplementary material
Source: Frontiers journal article supplement (https://www.frontiersin.org/articles/310982)
Supplement: Table_S1.XLSX [file Table_S1.XLSX]

## Sheet: Sheet1
clade	species	time_bin_midage	paleolatitude	paleolongitude	collection	AREA_SPECIES	AREA_CLADE
Athyridida	Koninckodonta_fuggeri	186.3	28.61	25.4	Epl?ny,ManganeseOreMine,BakonyMts.	3.79396	3.79396
Athyridida	Oxycolpella_oxycolpos	203.6	30.31	16.77	Eiberg19-2	5748800	6211080
Athyridida	Neoretzia_superba	203.6	3.91	40.65	NaybandFm,Locality1-Wali-Abad	1724640	6211080
Athyridida	Amphiclina_intermedia	211.55	12	47.05	Al'maRiver,nearthevillageofBeshui,Crimea	707713	6211080
Athyridida	Majkopella_manzavini	211.55	7.34	46.87	AchesbokMt.,NWCaucasus	22754.5	6211080
Athyridida	Oxycolpella_oxycolpos	211.55	12	47.05	Al'maRiver,nearthevillageofBeshui,Crimea	278384	6211080
Athyridida	Neoretzia_superba	211.55	12	47.05	Al'maRiver,nearthevillageofBeshui,Crimea	707713	6211080
Athyridida	Majkopella_worobievi	211.55	7.34	46.87	AchesbokMt.,NWCaucasus	49518.2	6211080
Athyridida	Amphiclina_intermedia	213.55	28.82	66	Qiagelanortheast,76Z21,Shuanghu	2969750	11286300
Athyridida	Ochotathyris_ochotica	213.55	76.7	-102.65	RossokhaRiver,belowmouthofNenkalRIver	1359570	11286300
Athyridida	Oxycolpella_robinsoni	213.55	6.41	46.85	BugunzhaRiver,NWCaucasus	7494790	11286300
Athyridida	Dioristella_indistincta	226.75	12.18	24.62	SouthernBakony-Sandorhegy	646812	656738
Athyridida	Amphiclina_squamula	226.75	12.18	24.62	SouthernBakony-Sandorhegy	11285	656738
Athyridida	Dioristella_indistincta	233.5	9.1	27.76	KorytnicaLimestones,1kmSofLiptovskaOsada	240511	494551
Athyridida	Diplospirella_wissmanni	233.5	12.46	20.32	Seelandalpe,reefdwellers	220806	494551
Athyridida	Athyris_kaihikuana	238.5	-72.41	157.4	JDC2312,RockyGully(J35/f8539)	5334.56	494551
Athyridida	Tetractinella_trigonella	238.5	7.6	20.97	Section2-1011P	321691	494551
Athyridida	Schwagerispira_fuchsi	244.6	13.31	95.13	BangtoupoF10,Qingyan,China	905705	6751550
Athyridida	Pexidella_marmorea	244.6	6.35	25.3	L?rchecknearBerchtesgaden	2361.13	6751550
Athyridida	Schwagerispira_mojsisovicsi	244.6	6.35	25.3	L?rchecknearBerchtesgaden	7.95467	6751550
Athyridida	Schwagerispira_schwageri	244.6	1.35	31.06	Stitnik	71517.1	6751550
Athyridida	Schwagerispira_subcircularis	244.6	13.31	95.13	BangtoupoF19,Qingyan,China	905011	6751550
Athyridida	Tetractinella_trigonella	244.6	1.35	31.06	Stitnik	5757010	6751550
Athyridida	Anisactinella_venetiana	244.6	2.01	24.62	Ogorie,nearKnin	221.839	6751550
Athyridida	Spirigerellina_pygmaea	249.25	38.99	111.51	AyaxBayinRussianIsland,Beds53-54	81836.6	6751550
Athyridida	Cleiothyridina_accola	253.15	-41.13	56.32	FootofhighestcliffENEofKumaranwali,SaltRange	12646.1	44969800
Athyridida	Cleiothyridina_accoliformis	253.15	-50.28	61.85	W1208,KarnaliUnspecified	4945.88	44969800
Athyridida	Transcaucasathyris_araxensis	253.15	-1.35	39.32	JulfaSection,Bed54-2,Kuh-eAliBashi	17000000	44969800
Athyridida	Juxathyris_bisulcata	253.15	8.33	93.94	BeifengjingSection	2377300	44969800
Athyridida	Araxathyris_bruntoni	253.15	-1.51	44.68	ElikahRiversectionIR164,Alborzmountains	226.179	44969800
Athyridida	Janiceps_cadorica	253.15	4.7	25.59	PizdaPeres,transitionalbeds,Dolomites	698.647	44969800
Athyridida	Cleiothyridina_capillata	253.15	-40.69	55.55	Bilot,UpperProductus-limestone,KhisorRange	4376180	44969800
Athyridida	Cleiothyridina_dalmiriensis	253.15	-41.04	56.26	Eastofpt2263,ESEofChhidru,Chhidruzone,SaltRange	7757.08	44969800
Athyridida	Spirigerella_derbyi	253.15	-41.31	56.44	WestofKhura,UpperProductus-limestone,SaltRange	3337090	44969800
Athyridida	Cleiothyridina_deroissyi	253.15	-52.54	63.88	SelongXishan,coralbed	63964.2	44969800
Athyridida	Araxathyris_dilatata	253.15	8.33	93.94	BeifengjingSection	62954.6	44969800
Athyridida	Tarimathyris_discusella	253.15	10.8	97.02	Daluokeng,DaluokengMember1,Gaofeng,CiliCounty	62295	44969800
Athyridida	Tongzithyris_extensa	253.15	7.18	95.76	TuanxiSection	37751	44969800
Athyridida	Spirigerella_fusiformis	253.15	-41.31	56.44	KhundGhat,UpperProductus-limestone,SaltRange(Wynnecoll)	5122.23	44969800
Athyridida	Cleiothyridina_globulina	253.15	-41.04	56.26	Eastofpt2263,ESEofChhidru,calcareoussandstone,K30.24-49,SaltRange	1117140	44969800
Athyridida	Hustedia_grandicosta	253.15	32.16	111.31	KP14,KuwanoePass,Monobe,Ayabe-cho,KyotoPrefecture	17300000	44969800
Athyridida	Spirigerella_grandis	253.15	-41.13	56.32	FootofhighestcliffENEofKumaranwali,SaltRange	164622	44969800
Athyridida	Cleiothyridina_grossula	253.15	-41.04	56.26	Eastofpt2263,ESEofChhidru,Bellerophonbed,SaltRange	12433.2	44969800
Athyridida	Araxathyris_guizhouensis	253.15	17.28	101.87	Huangzhishansection,undivChangxingFm,XuzhouCity	6221840	44969800
Athyridida	Comelicania_haueri	253.15	4.67	25.35	Balest,HorizonB,Ortisei	562.578	44969800
Athyridida	Spirigerella_hybrida	253.15	-41.31	56.44	KhundGhat,UpperProductus-limestone,SaltRange(Wynnecoll)	14639.3	44969800
Athyridida	Hustedia_indica	253.15	8.33	93.94	BeifengjingSection,Bed26,ZhongliangHill	6229140	44969800
Athyridida	Transcaucasathyris_kandevani	253.15	6.72	94.18	ChuanyanSection,Bed14,Xingwen	1474610	44969800
Athyridida	Hustedia_lata	253.15	6.57	96.35	WenjiangsiSection,Bed45,GuidingCounty	454444	44969800
Athyridida	Transcaucasathyris_lata	253.15	-1.51	44.68	ElikahRiversectionIR164,Alborzmountains	74852.2	44969800
Athyridida	Spirigerella_media	253.15	-41.26	56.53	Khura,UpperProductus-limestone,SaltRange	6351.36	44969800
Athyridida	Comelicania_megalotis	253.15	4.67	25.35	Balest,HorizonB,Ortisei	1782.43	44969800
Athyridida	Comelicania_merlai	253.15	4.7	25.59	PizdaPeres,transitionalbeds,Dolomites	698.647	44969800
Athyridida	Transcaucasathyris_minor	253.15	35.84	112.52	Vodopadnaya,P2520-3,PartizanskayaRegion	16900000	44969800
Athyridida	Spirigerella_minuta	253.15	-41.04	56.26	Eastofpt2263,ESEofChhidru,Chhidruzone,SaltRange	4722.92	44969800
Athyridida	Spirigerella_obovata	253.15	-41.13	56.32	FootofhighestcliffENEofKumaranwali,SaltRange	22868.5	44969800
Athyridida	Hustedia_orbicostata	253.15	17.28	101.87	Huangzhishansection,undivChangxingFm,XuzhouCity	264458	44969800
Athyridida	Spirigerella_ovoidalis	253.15	-41.31	56.44	WestofKhura,UpperProductus-limestone,SaltRange	16871.1	44969800
Athyridida	Janiceps_papilio	253.15	4.62	25.07	ValBrutta,Beds11-12,Dolomites	625.851	44969800
Athyridida	Cleiothyridina_pectinifera	253.15	-41.13	56.32	FootofhighestcliffENEofKumaranwali,SaltRange	5508950	44969800
Athyridida	Janiceps_peracuta	253.15	4.24	25.75	CaseraFederata,Dolomites	1545.56	44969800
Athyridida	Cleiothyridina_pijaensis	253.15	-40.55	55.35	USNM9049,TapanWahan,southernKhisorRange	7631.66	44969800
Athyridida	Spirigerella_praelonga	253.15	-41.31	56.44	WestofKhura,UpperProductus-limestone,SaltRange	14264.2	44969800
Athyridida	Araxathyris_protea	253.15	6.4	96	Pingqiao,P-1,ZhijinCounty	2978110	44969800
Athyridida	Spirigerella_proxima	253.15	-41.08	56.32	HillslopesbetweentributariesofBaralNala,EofChapri,SaltRange	22471.4	44969800
Athyridida	Araxathyris_quadrilobata	253.15	8.33	93.94	BeifengjingSection,Bed26,ZhongliangHill	651022	44969800
Athyridida	Comelicothyris_recticardinis	253.15	4.62	25.07	ValBrutta,Beds11-12,Dolomites	3230.95	44969800
Athyridida	Hustedia_remota	253.15	8.33	93.94	BeifengjingSection,Bed26,ZhongliangHill	1663480	44969800
Athyridida	Juxathyris_shuizhutangensis	253.15	10.8	97.02	Daluokeng,DaluokengMember1,Gaofeng,CiliCounty	394966	44969800
Athyridida	Araxathyris_sinensis	253.15	8.33	93.94	BeifengjingSection,Bed4,ZhongliangHill	1185980	44969800
Athyridida	Cleiothyridina_subexpansa	253.15	-51.91	62.79	PG1,RidgeAofChuluMassif,Braga,Manangarea	4763870	44969800
Athyridida	Araxathyris_timorensis	253.15	6.72	94.18	ChuanyanSection,Bed12,Xingwen	12000000	44969800
Athyridida	Gruntallina_triangularis	253.15	-1.32	39.32	DorashamII-3,Bed3	538.476	44969800
Athyridida	Araxathyris_yuananensis	253.15	8.33	93.94	BeifengjingSection,Bed9,ZhongliangHill	174.473	44969800
Athyridida	Juxathyris_zhijinensis	253.15	9.17	100.79	DapaichongSection	120752	44969800
Athyridida	Spirigerella_alata	255.65	-42.67	56.03	Dalmiriarea,Kathwai,SaltRange	498.419	44969800
Athyridida	Araxathyris_felina	255.65	-3.16	45.27	UpperNurValley,CentralElburzMountains	20465.2	44969800
Athyridida	Cleiothyridina_interposita	255.65	-42.19	56	NNEofBuriKhel,SaltRange	11046.7	44969800
Athyridida	Spirigerella_paraliensis	255.65	-42.59	55.9	SsideofParaliPlateau,NWofJabbi,K28.442-454,SaltRange	2231.36	44969800
Athyridida	Cleiothyridina_simulans	255.65	-42.51	55.91	WNWofSirra,SaltRange	1264.35	44969800
Athyridida	Cleiothyridina_xetriformis	255.65	-42.62	56.1	JustW.ofKhura,K29.108-119,187-199,SaltRange	3645.8	44969800
Athyridida	Araxathyris_abichi	256.5	-2.79	39.59	Karabaglyar-1,Bed2	32.3588	44969800
Athyridida	Composita_emarginata	256.5	19.09	81.94	Saililongxiuma6867GS10,Sailong,HenanCounty	35645.7	44969800
Athyridida	Himathyris_gerardi	256.5	-55.51	63.72	Qubu,Bed15	70308.4	44969800
Athyridida	Pinegathyris_kotlukovi	256.5	43.12	13.59	CapeSelander,Sample323,Nordaustlandet	183.633	44969800
Athyridida	Cleiothyridina_maynci	256.5	31.23	14.6	Djaevlekloften,Clavering?	1017.94	44969800
Athyridida	Juxathyris_obesa	256.5	-42.96	55.78	N.ofNanga,K36.140-153,SaltRange	495187	44969800
Athyridida	Composita_affinis	262	4.03	-33.42	AMNH25,BenchMark4425,GuadalupeMountains	5162.64	44969800
Athyridida	Septospirigerella_applanata	262	-5.42	40.81	Chanakhchi,ArpinskayaHorizon	1481.25	44969800
Athyridida	Septospirigerella_baissalensis	262	-5.75	40.51	BaisalMountain,WestSlope,KhachikGorizont	1333.45	44969800
Athyridida	Hustedia_elongata	262	15.37	-35.83	CherryCreekRangeCCR-523	15631.7	44969800
Athyridida	Septospirigerella_grandis	262	-5.75	40.51	Baisal,Bed27	522.792	44969800
Athyridida	Uncinella_indica	262	-45.11	55.22	Amb,lowestbedsofcompactMiddleProductus-limestone,SaltRange	2184.95	44969800
Athyridida	Hustedia_longirostris	262	30.37	111.3	KungasniyCreek,Primorye	4296.31	44969800
Athyridida	Septospirigerella_megridagica	262	-5.75	40.51	Baisal,Bed27	522.792	44969800
Athyridida	Composita_mexicana	262	4.66	-28.91	NacoButte,HallCounty(DozierLens,Newell9,Roth361-C)	445.293	44969800
Athyridida	Composita_mira	262	15.37	-35.83	CherryCreekRangeCCR-523	15631.7	44969800
Athyridida	Composita_parasulcata	262	15.57	-35.52	SouthernPequopMountainsSPM-82	5303.1	44969800
Athyridida	Composita_pyriformis	262	4.07	-33.29	AMNH388,RaderRidge,GuadalupeMountains	86.7683	44969800
Athyridida	Hustedia_rupinata	262	4.07	-33.29	AMNH388,RaderRidge,GuadalupeMountains	93.9245	44969800
Athyridida	Thedusia_trigonalis	262	4.03	-33.42	AMNH25,BenchMark4425,GuadalupeMountains	72.62	44969800
Athyridida	Thedusia_ventricosa	262	4.1	-33.28	AMNH373,BearCanyon,GuadalupeMountains	93.9245	44969800
Athyridida	Cleiothyridina_acutomarginalis	263.5	35.6	104.33	Baianhua,JalaidQi	1115440	18008900
Athyridida	Spirigerella_derbyi	263.5	-44.97	54.43	ScarpslopesNWofBilot,Trans-IndusRange	4591260	18008900
Athyridida	Cleiothyridina_deroissyi	263.5	35.62	104.25	ZhaganChulu,Undivided,BayanWulan,JalaidQi	1287600	18008900
Athyridida	Hustedia_grandicosta	263.5	32.67	107.76	SanhetuanSection,Bed9,WuchangArea	7468350	18008900
Athyridida	Spirigerella_numismalis	263.5	-44.97	54.43	ScarpslopesNWofBilot,Trans-IndusRange	3550.93	18008900
Athyridida	Cleiothyridina_semiconcava	263.5	-44.97	54.43	ScarpslopesNWofBilot,Trans-IndusRange	3702.63	18008900
Athyridida	Cryptospirifer_omeishanensis	265.75	2.22	96.78	Liushutang,ChangyangCounty	183986	18008900
Athyridida	Titanothyris_striata	265.75	4.43	98.54	LiujiachangSection,MaokouFm,SongziCounty	122332	18008900
Athyridida	Composita_affinis	266.5	3.65	-33.53	USNM725k,PineTop,GuadalupeMountains	13906.8	18008900
Athyridida	Septospirigerella_baissalensis	266.5	-8.48	41.34	BaisalMountain,WestSlope,GnishikFormation	221.797	18008900
Athyridida	Hustedia_citeria	266.5	3.6	-33.55	AMNH496,GuadalupePass,GuadalupeMountains	0.614174	18008900
Athyridida	Hustedia_demissa	266.5	3.64	-33.48	AMNH33,LigonRanch,GuadalupeMountains	21.3733	18008900
Athyridida	Thedusia_dischides	266.5	3.6	-33.55	AMNH496,GuadalupePass,GuadalupeMountains	0.614174	18008900
Athyridida	Composita_emarginata	266.5	3.63	-33.48	AMNH398,LigonRanch,GuadalupeMountains	10.0605	18008900
Athyridida	Composita_enormis	266.5	1.64	-33.05	USNM706d,HessCanyon,GlassMountains	4.33832	18008900
Athyridida	Xenosaria_exotica	266.5	3.55	-33.54	USNM731,PinyonTank,GuadalupeMountains	0.61415	18008900
Athyridida	Composita_grandis	266.5	11.72	-40.28	USNM806c,CerrosdelosMonos,ElAntimonio,Sonora	1.20562	18008900
Athyridida	Hustedia_indica	266.5	-46.27	55.21	Amb,BasalFossiliferousBeds,SaltRange	6.85846	18008900
Athyridida	Cryptospirifer_iranica	266.5	-16.28	35.19	Naltas,SainbeyliArea	4161500	18008900
Athyridida	Composita_mira	266.5	15.18	-36.03	MedicineRangeMR-(-150)	96797.4	18008900
Athyridida	Hustedia_opsia	266.5	3.64	-33.48	AMNH33,LigonRanch,GuadalupeMountains	21.3733	18008900
Athyridida	Hustedia_papillata	266.5	3.64	-33.53	USGS2930green,PineSpring,GuadalupeMountains	1506.23	18008900
Athyridida	Composita_parasulcata	266.5	14.45	-35.27	GersterGulch,DeepCreekRangeGH-14	3471.02	18008900
Athyridida	Thedusia_procera	266.5	1.62	-33.03	USNM706z,WordFormation(ChinaTankMb.),OldWordRanch,GlassMountains	0.62212	18008900
Athyridida	Hustedia_pugilla	266.5	1.64	-33.05	USNM706d,HessCanyon,GlassMountains	64.0396	18008900
Athyridida	Composita_pyriformis	266.5	3.64	-33.48	AMNH33,LigonRanch,GuadalupeMountains	3.20714	18008900
Athyridida	Hustedia_rupinata	266.5	3.64	-33.48	AMNH33,LigonRanch,GuadalupeMountains	21.3733	18008900
Athyridida	Hustedia_samiata	266.5	3.53	-33.55	AMNH635,PinyonTank,GuadalupeMountains	9.03636	18008900
Athyridida	Titanothyris_striatus	266.5	-1.34	94.15	Mulongdongsection,Maokoubed4,HuayingMountains	430.613	18008900
Athyridida	Spirigerella_subtriangularis	266.5	-25.77	50.08	SurmaqNRsection,horizonR20,Abadeh	34206.1	18008900
Athyridida	Thedusia_trigonalis	266.5	3.63	-33.48	AMNH398,LigonRanch,GuadalupeMountains	21.3733	18008900
Athyridida	Cleiothyridina_uralica	266.5	-10.29	47.31	Shemshak,(61)IA-G178,ElburzMountains	5.45218	18008900
Athyridida	Thedusia_ventricosa	266.5	3.64	-33.48	AMNH33,LigonRanch,GuadalupeMountains	21.3733	18008900
Athyridida	Composita_affinis	270.25	1.38	-33.16	R.E.King144,Hill5611,GlassMountains	2793.16	18008900
Athyridida	Hustedia_bipartita	270.25	1.38	-33.17	USNM706c,HessCanyon,GlassMountains	6.70486	18008900
Athyridida	Hustedia_connorsi	270.25	1.36	-33.44	USNM700v,OldPayneRanch,GlassMountains	50.278	18008900
Athyridida	Hustedia_consuta	270.25	1.36	-33.14	USNM703,OldWordRanch,GlassMountains	64.3102	18008900
Athyridida	Composita_crassa	270.25	1.36	-33.14	USNM703,OldWordRanch,GlassMountains	64.9958	18008900
Athyridida	Hustedia_cuneata	270.25	1.37	-33.22	USNM706f,RoadCanyonFormation,lowerHessCanyon,GlassMountains	19.4797	18008900
Athyridida	Composita_enormis	270.25	1.36	-33.44	USNM700v,OldPayneRanch,GlassMountains	26938	18008900
Athyridida	Thedusia_mesocostata	270.25	1.36	-33.14	USNM703,OldWordRanch,GlassMountains	74.9076	18008900
Athyridida	Composita_mira	270.25	1.38	-33.16	R.E.King144,Hill5611,GlassMountains	3229.18	18008900
Athyridida	Cleiothyridina_nana	270.25	1.37	-33.33	USNM709c,RoadCanyonFormation,SullivanRanch,GlassMountains	7.67109	18008900
Athyridida	Bajtugania_netschaevi	270.25	28.18	47.02	Abishevo,DemaRiver,BajtuganBedsSection17Bed1	201605	18008900
Athyridida	Cryptospirifer_omeishanensis	270.25	-30.46	86.84	WoniusiSection,LowerShazipoFormation,Baoshan	118443	18008900
Athyridida	Hustedia_papillata	270.25	1.37	-33.15	UniversityofTexasT251,WordRanch,GlassMountains	2504.33	18008900
Athyridida	Composita_parasulcata	270.25	1.38	-33.17	USNM706c,HessCanyon,GlassMountains	1705.87	18008900
Athyridida	Cleiothyridina_pectinifera	270.25	27.98	44.87	ChuvashskiiBajtuganFarm,SokRiver,SamaraOblast	634971	18008900
Athyridida	Composita_pilula	270.25	1.37	-33.22	USNM706f,RoadCanyonFormation,lowerHessCanyon,GlassMountains	33.5433	18008900
Athyridida	Thedusia_procera	270.25	1.38	-33.17	USNM706,HessCanyon,GlassMountains	10.0085	18008900
Athyridida	Hustedia_pugilla	270.25	1.37	-33.14	USNM703e,OldWordRanch,GlassMountains	40.1333	18008900
Athyridida	Hustedia_pusilla	270.25	1.39	-33.36	R.E.King53,SullivanPeak,GlassMountains	2200.62	18008900
Athyridida	Hustedia_ratburiensis	270.25	-31.3	107.55	USNM9271,Block3,KoMukIslandnortheast	1174790	18008900
Athyridida	Pinegathyris_royssiana	270.25	33.9	32.29	Dolgoshchel'yeVillage,Section8,Unit3a,KuloyRiver,ArkhangelRegion	170137	18008900
Athyridida	Hustedia_sculptilis	270.25	1.38	-33.17	USNM706c,HessCanyon,GlassMountains	12.3607	18008900
Athyridida	Cleiothyridina_seriata	270.25	-31.31	99.82	USNM9266,Block2,KhaoMangLatHill,BanKao	140.775	18008900
Athyridida	Composita_mira	275.6	13.22	-28.93	ErvayCarbonateRockMember,ParkCityFormationofWyoming	31962.7	160659
Athyridida	Composita_subtilita	275.6	0.47	-29.99	TX7573-ColemanCounty,Texas	143206	160659
Athyridida	Hustedia_ampullacea	276	1.06	-33.26	USNM702,SplitTank,GlassMountains	7208.61	160659
Athyridida	Composita_apheles	276	1.06	-33.36	USNM705a,HessRanch,GlassMountains	1979.38	160659
Athyridida	Composita_bucculenta	276	1.06	-33.26	USNM702,SplitTank,GlassMountains	53.9153	160659
Athyridida	Thedusia_bucrenata	276	1.06	-33.28	USNM702b,SplitTank,GlassMountains	0.504711	160659
Athyridida	Hustedia_catella	276	1.06	-33.36	USNM705a,HessRanch,GlassMountains	580.055	160659
Athyridida	Hustedia_cepacea	276	1.05	-33.32	USNM702d,Hill5725,GlassMountains	23.9665	160659
Athyridida	Hustedia_consuta	276	1.06	-33.29	USNM703a,OldWordRanch,GlassMountains	1.79574	160659
Athyridida	Composita_cracens	276	2.65	-34.04	USNM728e,VictorioCanyon,SierraDiablo	385.834	160659
Athyridida	Composita_crassa	276	1.06	-33.26	USNM702a,SplitTank,GlassMountains	111.762	160659
Athyridida	Hustedia_decollatensis	276	3.13	-33.76	AMNH369,ShirttailCanyon,GuadalupeMountains	273.291	160659
Athyridida	Himathyris_gerardi	276	19.75	-36.11	L8,1milenorthofTuckerButte,Grindstone-TwelvemileCreekarea	0	160659
Athyridida	Hustedia_glomerosa	276	2.65	-34.04	USNM728f,VictorioCanyon,SierraDiablo	19.0341	160659
Athyridida	Hustedia_hessensis	276	1.06	-33.36	USNM705a,HessRanch,GlassMountains	18276.9	160659
Athyridida	Hustedia_lusca	276	1.04	-33.6	USNM700l,DugoutMountain,GlassMountains	33.3366	160659
Athyridida	Composita_mexicana	276	2.87	-34.6	MaloneMountainsandoutlyingfoothills,BriggsFormation	99125.8	160659
Athyridida	Hustedia_narinosa	276	1.06	-33.31	USNM702c,OldWordRanch,GlassMountains	14.1479	160659
Athyridida	Hustedia_papillata	276	1.06	-33.27	R.E.King128,SplitTank,GlassMountains	32.7709	160659
Athyridida	Hustedia_spicata	276	1.05	-33.59	USNM700x,DugoutMountain,GlassMountains	54.3045	160659
Athyridida	Composita_stalagmium	276	1.06	-33.31	USNM702c,OldWordRanch,GlassMountains	23.4847	160659
Athyridida	Cleiothyridina_circularis	284.8	29.87	68.81	UzunbulakSection,Bed16,Piqiang,ArtuxCity	491786	739020
Athyridida	Composita_cracens	284.8	1.61	-35.49	AMNH390,1.1milesNEofRancheriaMountain,HuecoMountains	6807.78	739020
Athyridida	Composita_mexicana	284.8	12.9	-36.35	UCMPD-5614,HighBaldPeaks,MedicineRange	62939.5	739020
Athyridida	Hustedia_mormonii	284.8	-0.8	-34.35	R.E.King196,HessRanchHorst,GlassMountains	2622.96	739020
Athyridida	Composita_subtilita	284.8	-0.8	-34.35	R.E.King196,HessRanchHorst,GlassMountains	204739	739020
Athyridida	Cleiothyridina_ailakensis	292.55	-52.57	65.68	DM35,HunzaValley	167880	2757820
Athyridida	Hustedia_culcitula	292.55	7.8	-39.75	WampSpring,Unit39	498.469	2757820
Athyridida	Hustedia_mormoni	292.55	-34.43	-45.14	CopacabanaFm:ApillapampaSample6-2572	904685	2757820
Athyridida	Hustedia_mormonii	292.55	-0.39	-37.27	R.E.King395,HuecoMountains	36552.5	2757820
Athyridida	Composita_strongyle	292.55	-3.24	-35.87	USNM709t,LenoxHillsFormation,LeonardMountain,GlassMountains	3356.16	2757820
Athyridida	Composita_subtilita	292.55	-34.43	-45.14	CopacabanaFm:ApillapampaSample6-2539	2596890	2757820
Athyridida	Hustedia_meridionalis	294.5	-27.93	-49.89	AMNH297,Bed13a,CerroAmp?ysection7,Abanc?y	1787.38	2757820
Athyridida	Hustedia_sicuaniensis	294.5	-27.69	-50.49	AMNH298,Bed53,Pasaje-PicchuSection8	43846.3	2757820
Athyridida	Cleiothyridina_rectimarginata	296.95	-4.44	-36.6	USNM701,WolfCampHills,GlassMountains	1.23344	2757820
Athyridida	Hustedia_trita	296.95	-4.45	-36.6	USNM701a,WolfCampHills,GlassMountains	2.46074	2757820
Athyridida	Composita_subtilita	302.925	3.54	-37.13	HonakerTrailFormation,Moab,Utah,Unit5	768162	785434
Athyridida	Hustedia_mormoni	309.85	-5.64	-29.7	USGS7744-CrawfordCty,Kansas	314968	785434
Athyridida	Cleiothyridina_orbicularis	309.85	-5.64	-29.7	USGS7744-CrawfordCty,Kansas	242805	785434
Athyridida	Composita_ovata	309.85	-3.02	-40.61	CentralWhiskeyCanyon,BolanderGroup,Collection114	248512	785434
Athyridida	Cleiothyridina_pecosii	310.375	-1.49	-37.45	TalpaNewMexico	26708.2	785434
Athyridida	Cleiothyridina_orbicularis	314.775	2.76	-43.79	Zone21-BirdSpringFm.,ArrowCanyon	31815.4	742832
Athyridida	Composita_ovata	314.775	1.93	-43.29	HiddenCanyon,USGS22231-PC	420503	742832
Athyridida	Composita_subtilita	314.775	2.41	-36.05	USGS3843-PC	303926	742832
Athyridida	Composita_gibbosa	316.35	1.62	-43.88	SnapCanyon,USGS22269-PC	55794.4	742832
Athyridida	Hustedia_miseri	316.35	-12.62	-27.97	ParkwoodFormation,Faunallevel3,FranklinCo.,Alabama	193046	742832
Athyridida	Composita_subtilia	316.35	1.74	-43.52	HiddenCanyon,unnumberedcollection,80ftabovebaseofformation	679.159	742832
Athyridida	Composita_laevis	322.25	4.03	-36.63	USGSbluefileLoc.13395	3.06005	742832
Athyridida	Composita_ozarkana	322.25	4.41	-36.7	USGSbluefileLoc.13370	533.554	742832
Athyridida	Composita_sigma	322.25	3.9	-41.06	ArcoHillstypesection,packstone	368.087	742832
Athyridida	Cleiothyridina_sublamellosa	322.25	-11.17	-26.83	Locality10,GlenDeanLimestone,CrawfordCo.,IN	90082.6	742832
Athyridida	Composita_subquadrata	322.25	-10.94	-26.88	Locality3,GlenDeanLimestone,MartinCo.,IN	56678.4	742832
Athyridida	Composita_sulcata	322.25	4.03	-36.63	USGSbluefileLoc.13395	22278.5	742832
Athyridida	Composita_trinuclea	322.25	-11.49	-27.02	Locality20,GlenDeanLimestone,PerryCo.,IN	11.6207	742832
Athyridida	Eumetria_vera	322.25	-11.25	-38.11	VillageofMilo	36877.9	742832
Athyridida	Cleiothyridina_hirsuta	327	0.79	-39.46	USGS19283-PC	1204680	3507160
Athyridida	Composita_poposiensis	327	0.77	-39.46	USGS19284-PC	4903.49	3507160
Athyridida	Composita_sigma	327	0.79	-39.46	USGS19283-PC	345.329	3507160
Athyridida	Composita_subquadrata	327	2.01	-39.19	UW43106/19A(Univ.WYLaramie)	2268890	3507160
Athyridida	Composita_sulcata	327	0.77	-39.46	USGS19284-PC	17664.1	3507160
Athyridida	Eumetria_sulcata	327	0.79	-39.46	USGS19283-PC	165.324	3507160
Athyridida	Cleiothyridina_sublamellosa	327.05	-11.93	-28.28	Locality1,GolcondaFormation,GreeneCo.,Indiana	936520	3507160
Athyridida	Composita_trinuclea	327.05	-11.93	-28.28	Locality1,GolcondaFormation,GreeneCo.,Indiana	2737630	3507160
Athyridida	Eumetria_vera	327.05	-11.93	-28.28	Locality1,GolcondaFormation,GreeneCo.,Indiana	318082	3507160
Athyridida	Composita_ozarkana	328.75	4.05	-39.04	HossfeldtHills,localityno.236	643612	3507160
Athyridida	Hustedia_mormoni	329.8	-12.17	-40.51	TX7546-StephensCo.,Texas	28505.2	3507160
Athyridida	Composita_subtilita	329.8	-13.1	-41.83	TX7505-McCollochCo.,Texas	28505.2	3507160
Athyridida	Actinoconchus_planosulcatus	332.9	-5.55	3.07	WeaverHillsDistrict,UpperWaterhousesLimestone	157534	4546690
Athyridida	Cleiothyridina_australis	335.85	-44.89	152.94	UniversityofNewSouthWalesCollectionL.233	7863.31	4546690
Athyridida	Athyris_lamina	335.85	-43.2	150.25	17-6BackCreek,WooloomaFormation,NewSouthWales,Australia	3648.49	4546690
Athyridida	Eumetria_mona	335.85	-44.73	152.93	BrownmoreSection85,Bed85-6,FlagstaffSandstone,NewSouthWales	8.82246	4546690
Athyridida	Cleiothyridina_segmentata	335.85	-45.15	152.36	29-1,Malumla,WooloomaFormation,NewSouthWales,Australia	8481.73	4546690
Athyridida	Athyris_wiragullensis	335.85	-44.83	152.16	UpperRouchel,Section44,Bed41-4,WooloomaFormation,NewSouthWales	68.9837	4546690
Athyridida	Athyris_expansa	337.7	-6.43	1.6	Castletonarea,marginalshelfandbackreef	34.4974	4546690
Athyridida	Eumetria_verneuiliana	339.4	-0.47	-74.35	EastofMadredeDiosIsland,TrocaderoBay	4383700	4546690
Athyridida	Cleiothyridina_hirsuta	340.5	-18.2	-32.66	SalemLs.,TaylorandGreenCos.,KY	124895	4546690
Athyridida	Composita_trinuclea	340.5	-18.2	-32.66	SalemLs.,TaylorandGreenCos.,KY	41204.7	4546690
Athyridida	Eumetria_verneuliana	340.5	-17.65	-32.67	SomersetSh.Member,SalemLs.,IU16713,HardinCo.,KY	137.831	4546690
Athyridida	Athyris_lamellosa	345.15	-18.9	-32.82	BoyScoutCamp,IU15109-3000,EdwardsvilleFm.,MonroeCo.,IN	39523.5	64158
Athyridida	Composita_trinuclea	345.15	-18.9	-32.82	BoyScoutCamp,IU15109-9000,EdwardsvilleFm.,MonroeCo.,IN	28588.5	64158
Athyridida	Composita_athabaskensis	353	0.61	-41.89	Mt.Greenock,77m,BanffFormation,WesternAlberta	1841.34	973285
Athyridida	Nucleospira_barrisi	353	-19.84	-35.94	WassonvilleFm.,southeasternIowa	132.256	973285
Athyridida	Composita_humilis	353	-8.52	-46.32	Collection18634-PC,LodgepoleLimestone,ChesterfieldRange	193107	973285
Athyridida	Composita_humulis	353	-9.26	-47.29	BuckskinHill,LodgepoleLimestone	2874.56	973285
Athyridida	Eumetria_iowensis	353	-17.61	-37.34	Z4A-AbandonedQuarry,GilmoreCityLimestone	0.587303	973285
Athyridida	Cleiothyridina_lata	353	0.61	-41.89	Mt.Greenock,77m,BanffFormation,WesternAlberta	6763.82	973285
Athyridida	Cleiothyridina_miettensis	353	-9.26	-47.29	BuckskinHill,LodgepoleLimestone	2874.56	973285
Athyridida	Eumetria_osagensis	353	-19.84	-35.94	WassonvilleFm.,southeasternIowa	140444	973285
Athyridida	Composita_prolixa	353	0.61	-41.89	Mt.Greenock,37m,BanffFormation,WesternAlberta	779.347	973285
Athyridida	Cleiothyridina_tenuilineata	353	-8.52	-46.32	Collection18634-PC,LodgepoleLimestone,ChesterfieldRange	722376	973285
Athyridida	Composita_humilis	357.25	-9.83	-45.48	SouthHossfeldtHills,unitF	165425	973285
Athyridida	Athyris_coloradensis	362.7	-19.69	-48.77	BrokenRibMember,DyerFm.,Locality1,GarfieldCo.,CO	534.206	3426720
Athyridida	Athyris_angelica	367.65	0.34	-40.46	DFM5zonebrachiopods,westernCanada	3374110	3426720
Athyridida	Cleiothyridina_devonica	367.65	-14.89	-46.58	ThreeforksShale,JeffersonIslandCo.,Montana(measuredsection5ofauthor)	24282.1	3426720
Athyridida	Crinisarina_angelicoides	373.35	-16.51	26.9	SetII,TrenchZ-17,nearDebnik,HolyCrossMountains,Poland	827028	5343200
Athyridida	Athyris_concentrica	373.35	-20.94	3.14	FerquesFm.,GrisMbr.,vicinityofFerques,Bas-Boulonnais	127675	5343200
Athyridida	Athyris_davidsoni	373.35	-20.94	3.14	FerquesFm.,GrisMbr.,vicinityofFerques,Bas-Boulonnais	51498.1	5343200
Athyridida	Athyris_gurdoni	373.35	-0.68	107.24	Baqisection,bed7,XiangzhouCounty,Guangxi	43614.8	5343200
Athyridida	Athyris_angelica	377.8	-34.72	-25.79	WiscoySh.andSs.,JavaGp.,Ambocoelia-CariniferellaComm.,southernNewYork	31568.8	5343200
Athyridida	Athyris_bayeti	377.8	31.01	19.13	Solomino	4271290	5343200
Athyridida	Athyris_fultonensis	379.9	-33.32	-39.41	MouthofCowCreek,LocalityB	35398.6	5343200
Athyridida	Athyris_vittata	379.9	-12.52	-41.66	CookingLakecommunity,CookingLakeFm.,Alberta,Canada	412676	5343200
Athyridida	Athyris_concentrica	385.9	-23.02	7.38	RW225,Mittel-Fazies,bombcraternorthoftheBlankenheimRailroad	101146	4602090
Athyridida	Nucleospira_concinna	385.9	-36.56	-26.24	Locality2(WanakahShale,SmokesCreek,NY)	52279.1	4602090
Athyridida	Athyris_cora	385.9	-36.98	-23.64	Locality14(KnightsFallsRavine),Limestoneb,MottvilleMember,MadisonCo.	46233.2	4602090
Athyridida	Plectospira_ferita	385.9	-25.8	36.53	CelechovicenaHane,Horizon9(Moravia)	4266820	4602090
Athyridida	Trematospira_gibbosa	385.9	-36.5	-26.01	HillsGulchBed,ErieandGeneseeCounties,westernNY	5608.25	4602090
Athyridida	Uncites_gryphus	385.9	5.02	23.34	Shubartaubioherm,SouthernUrals,StringocephalusBeds	7699.74	4602090
Athyridida	Parazyga_hirsuta	385.9	-36.5	-26.01	HillsGulchBed,ErieandGeneseeCounties,westernNY	15206.4	4602090
Athyridida	Bifida_lepida	385.9	-23.02	7.38	RW198,Mittel-Fazies,Stra?en51roadcut,attheBlankenheimerrailwaytunnel	10253.8	4602090
Athyridida	Meristella_nasuta	385.9	-38.72	-22.36	HighlandMills-KanouseSandstone-ErieCut	83827.3	4602090
Athyridida	Athyris_spiriferiodes	385.9	-37.1	-23.37	Locality21(PayneBrook),Camarotoechiasandstones,MottvilleMember,MadisonC	34019.3	4602090
Athyridida	Athyris_spiriferoides	385.9	-36.61	-26.12	Locality1(WanakahShale,CazenoviaCreek,NY)	74574.7	4602090
Athyridida	Athyris_vittata	385.9	-20.93	-36.35	Locality7,1stoutcropbelowHwy10bridge,riverbendonRedDeernorthshore	2679.63	4602090
Athyridida	Coelospira_camilla	387.8	-38.49	-22.08	OO1ASchoharieValley	14476.7	4602090
Athyridida	Pentagonia_unisulcata	387.8	-38.03	-24.23	LC3DNECayugaLake	10703.8	4602090
Athyridida	Anoplotheca_acutiplicata	388.35	-42.87	-31.82	Huntersvilleformation(overview)	39784.4	4602090
Athyridida	Plicathyris_collensis	393.1	-41.5	34.22	Locality119DevonianassemblagefromthetopLaVidgroup,Leon,NWSpain	72301.1	96500.3
Athyridida	Plicathyris_ezquerrai	393.1	-41.5	34.22	Locality119DevonianassemblagefromthetopLaVidgroup,Leon,NWSpain	61442.5	96500.3
Athyridida	Anathyris_phalaena	393.1	-41.5	34.22	Locality119DevonianassemblagefromthetopLaVidgroup,Leon,NWSpain	72771.7	96500.3
Athyridida	Pachyplax_transversa	393.1	-41.5	34.22	Locality119DevonianassemblagefromthetopLaVidgroup,Leon,NWSpain	70051.1	96500.3
Athyridida	Plicathyris_alejensis	395.3	-40.77	35.55	Emsian-EifelianassemblagefromtheupperMonielloFm,Asturias,NWSpain	19041.5	96500.3
Athyridida	Pachyplax_elongata	397.2	-41.89	37.19	EmsianassemblagefromtheRanecesGroupCapasdeAguionFm,Asturias,NWSpain	697.247	96500.3
Athyridida	Pachyplax_gyralea	397.2	-41.89	37.19	EmsianassemblagefromthemiddleMonielloFm,Asturias,NWSpain	1147.5	96500.3
Athyridida	Anathyris_inflata	397.2	-41.89	37.19	EmsianassemblagefromtheRanecesGroupCapasdeAguionFm,Asturias,NWSpain	10.8347	96500.3
Athyridida	Anathyris_llanerensis	397.2	-41.89	37.19	EmsianassemblagefromtheRanecesGroupCapasdeAguionFm,Asturias,NWSpain	179.652	96500.3
Athyridida	Anathyris_parva	397.2	-41.89	37.19	EmsianassemblagefromtheRanecesGroupCapasdeAguionFm,Asturias,NWSpain	1275.53	96500.3
Athyridida	Athyris_subconcentrica	397.2	-42.03	37.52	LowerDevassemblfromRanecesGroupCapasdeAguionFm,SouthGrullos,NWSpain	3578.29	96500.3
Athyridida	Meristelloides_riskowskii	398.6	-67.27	-88.65	USNMloc.17941	6617.11	96500.3
Athyridida	Athyris_waratahensis	400.5	-17.06	173.78	ChattertonLoc.Gamma,lowerReceptaculitesLst,nearYass,NSW	1598.62	96500.3
Athyridida	Rhynchospirina_haidingeri	403.95	-44.75	52.4	Seewarte,CarnicAlps,WolayerSee	1475.74	1693.03
Athyridida	Spirigerella_grandis	405.8	4.78	126.72	LiujingVillage,Section1,Loc.27	217.142	1693.03
Athyridida	Protathyris_praecursor	412.55	6.36	126.71	LiujingVillage,Section1,Loc.17	43800000	58090400
Athyridida	Nucleospira_robusta	414.15	-45.04	52.41	Coniproetus-ProtocymostrophiaCommunity,PragueBasin	28077.2	58090400
Athyridida	Homoeospira_baylei	417.35	-15.1	0.79	IsorthisovalisComm.ofJuraForm.	667797	58090400
Athyridida	Dayia_bohemica	417.35	-18.59	6.47	DzwinogorodBedsatS-DboundarysectionsinDniestrValley	305477	58090400
Athyridida	Collarothyris_canaliculata	417.35	-14.79	1.19	MicrosphaeridiorhynchusnuculaCommunityinGrauzai-105borehole	4857880	58090400
Athyridida	Didymothyris_didyma	417.35	-18.4	7.04	ProetusscalicusCommunity,midVarnitsasuite,Podolia	901622	58090400
Athyridida	Coelospira_extensa	417.35	-48.31	-126.52	LosEspejosFormation,FaciesC,beds17and21,CerrodelFuertesection	3672.04	58090400
Athyridida	Dayia_minor	417.35	-49.02	55.28	Loc.4.5,Nabrici,Srbsko,Sect.786,PozaryFmn.	938976	58090400
Athyridida	Dayia_navicula	417.35	-15.1	0.79	IsorthisovalisComm.ofJuraForm.	15300000	58090400
Athyridida	Coelospira_pusilla	417.35	7.25	-46.12	BrachiopodsofthePridolianofRoyalCreek,Yukon	19933.7	58090400
Athyridida	Merista_upsilon	417.35	0.09	14.67	Ust'irgislaBedsofunnamed(Bezymyannyi)Streamsection	56746.1	58090400
Athyridida	Hindella_congregata	419.45	-32.83	-42.9	Unit9,UpperTonolowayLimestone,GrasshopperRunSectionII	352.523	58090400
Athyridida	Retziella_plicata	419.45	8.55	130.41	Eoschizophora-ProtathyrisComm.,Loc.ADH59,MiaokaoFm.,Qujing,Yunnan	3137.44	58090400
Athyridida	Retziella_uniplicata	419.45	8.55	130.41	AtrypoideaCommunity,Loc.ADH28,KuantiFormation,QujingCo.,YunnanProv.	3183.58	58090400
Athyridida	Protathyris_xungmiaoensis	419.45	8.55	130.41	Eoschizophora-ProtathyrisComm.,Loc.ADH59,MiaokaoFm.,Qujing,Yunnan	3137.44	58090400
Athyridida	Rhynchospirina_baylei	420	-16.8	-2.25	EkeBeds:FossilsofHoburgen-typereeflimestone(Manten1971,TableIX)	160970	58090400
Athyridida	Jarovathyris_canaliculata	420	-50.95	56.82	Loc.2.4,CephalopodQuarry,Lochkow,sect.407,unit5	3021.22	58090400
Athyridida	Hyattidina_canalis	420	-26.3	-13.16	HyattidinacanalisCommunityinDyfed,Wales	2390.14	58090400
Athyridida	Whitfieldella_nitida	423.45	5.48	-50.02	Faunak,SectionAV4,DelormeFm.,MackenzieMts.	1750290	10921600
Athyridida	Meristina_obtusa	423.75	-19.08	-2.59	KlintebergBeds:FossilsofHoburgen-typereeflimestone(Manten1971,TableIX)	7466370	10921600
Athyridida	Homoeospira_baylei	424.55	-19.73	-2.64	HallaBedsBrachiopods	254559	10921600
Athyridida	Protozeuga_bicarinata	424.55	-20.06	-2.47	MuldeBedsBrachiopods	8762.28	10921600
Athyridida	Pseudoprotathyris_ephemera	424.55	-54.13	59.53	Hircinisca-AncillotoechiaCommunity,PragueBasin	13143.2	10921600
Athyridida	Nucleospira_lentilca	424.55	-54.92	58.48	Loc.4.1,ListiceSect.,Beroun,Listicesect.760,Motol	1179800	10921600
Athyridida	Nucleospira_pisum	424.55	-20.06	-2.47	MuldeBedsBrachiopods	1532320	10921600
Athyridida	Meristina_vesna	424.55	-54.37	59.42	Strophoprion-EoplectodontaCommunity,PragueBasin	9007.33	10921600
Athyridida	Whitfieldella_ypsilon	424.55	-54.92	58.48	Loc.4.1,ListiceSect.,Beroun,Listicesect.760,Motol	9918.46	10921600
Athyridida	Homoeospira_apriniformis	425.55	-27.06	-44.47	Homocrinus-AsaphocrinusAssoc.,RochesterShale,Lockport	289.17	10921600
Athyridida	Trematospira_camura	425.55	-27.41	-43.69	Coolinia-StegerhynchussubcommunityofthelowerRochesterShaleandHerkimerFo	4461.45	10921600
Athyridida	Whitfieldella_cylindrica	425.55	-27.37	-43.63	Whitfieldella-LargeLeptaenaCommunityoftheIrondequoitLimestone	5398.49	10921600
Athyridida	Homoeospira_evax	425.55	-27.75	-52.21	WaldronShaleFaciesA(Biohermal),SoutheastIndiana	1838.45	10921600
Athyridida	Whitfieldella_intermedia	425.55	-27.37	-43.63	Whitfieldella-LargeLeptaenaCommunityoftheIrondequoitLimestone	18116.7	10921600
Athyridida	Meristina_maria	425.55	-27.75	-52.21	WaldronShaleFaciesA(Biohermal),SoutheastIndiana	4322.38	10921600
Athyridida	Whitfieldella_naviformis	425.55	-27.6	-43.15	SodusCreekatGlenmark-Top25'Rochester	589.711	10921600
Athyridida	Nucleospira_pisiformis	425.55	-27.6	-43.28	Nucleospira-EnterolasmaCommunityoftheGlenmarkShaleatWallington/Sodustown	98297.7	10921600
Athyridida	Meristina_rectirostra	425.55	-27.58	-51.5	Eohalysiocrinusstigmatus-SievertsiaAssoc.,VailStoneQuarry	2483.93	10921600
Athyridida	Retziella_weberi	425.55	-17.6	74.77	RetziellaweberiCommunity,LateWenlockian,SouthernTienShan	510067	10921600
Athyridida	Whitfieldella_sulcatina	425.8	4.72	-49.33	Faunaj,SectionAV1,DelormeFm.,MackenzieMts.	27486.1	10921600
Athyridida	Nucleospira_calypta	427.2	7.22	126.25	UpperWengxiangFm.,UpperPart,atWengxiangnearKaili,SEGuizhouProvince	13105	10921600
Athyridida	Coelospira_sulcata	427.2	-26.94	-43.94	LittleWolcottCreek-bottom5'Irondequoit	39619.3	10921600
Athyridida	Meristospira_dunbari	429.45	-8.82	-51.82	SouthernManitoba,EastArmDolomite,W.Prin.mer.,MooseLake	1395.78	10921600
Athyridida	Meristina_manitobensis	429.85	-9.49	-50.97	S.Manitoba,CedarLakeDolomite,Sec.36W.Prin.mer.	17272.5	10921600
Athyridida	Coelospira_nitens	431.2	-29.41	-47	Unit6,RoseHillFormation,NorthMountainSection,Maryland	32069.7	10921600
Athyridida	Whitfieldella_nitida	433.3	-25.89	-45.43	Clorinda-EoplectodontaSubcommunityoftheRockwayFormation	89442.3	27591900
Athyridida	Coelospira_hemispherica	433.6	-24.89	-46.58	MaplewoodPark-LowerSodusShale	16034.3	27591900
Athyridida	Hindella_ovoides	435.95	-22.27	-58.47	EdgewoodGroup,LocalityA	69.6187	27591900
Athyridida	Coelospira_plicatula	435.95	-23.95	-48.34	NiagaraGorge-NeahgaShale180-186feet	3582.41	27591900
Athyridida	Hyattidina_congesta	437.5	-23.47	-48.57	NiagaraStreet&RR-112.5-122.5feet	372.687	27591900
Athyridida	Hindella_crassa	439.85	-34.98	-16.59	SB53A	1403.52	27591900
Athyridida	Hindella_crassa	441.35	-36.65	-16.82	Garth,G05	27500000	27591900
Athyridida	Hindella_cassidea	444.65	-28.39	-6.07	Borenshult	2392.8	58534600
Athyridida	Hindella_crassa	444.65	-39.15	-16.97	NorthwestflankeastofWenallt	57400000	58534600
Athyridida	Kellerella_misiusi	455.2	-13.66	78.14	Anderkenyn-Akchoku,Chu-IliRange,sample8226	98.5303	98.5303
Bellerophontidae	Cymbularia_klouceki	464.5	-56.85	84.98	?Poleuvily?(fieldnearF.Hanus?villa),Praha-S?rka	60.769	60.769
Bellerophontidae	Sphenosphaera_mohri	446.6	-25.04	-58.01	Richmond,WhitewaterFm.,WayneCo.,Indiana	11677.7	227100
Bellerophontidae	Sphenosphaera_capax	450.75	-27.9	-64.24	Leipers-Wilson,1949	1917.08	227100
Bellerophontidae	Sphenosphaera_burginensis	455.2	-27.3	-63.22	GrierMbr.,LexingtonLimestone,Kentucky	769.111	227100
Bellerophontidae	Bucanopsis_carinifera	455.2	-27.3	-63.22	GrierMbr.,LexingtonLimestone,Kentucky	1278.25	227100
Bellerophontidae	Sphenosphaera_rogersensis	455.2	-28.09	-66.37	Bigby-Cannon(Bigby)-Wilson,1949	213283	227100
Bellerophontidae	Sphenosphaera_troosti	455.2	-28.09	-66.37	Bigby-Cannon(Dovefacies)-Wilson,1949	7681.9	227100
Bellerophontidae	Bubovicus_tarda	420	-51.05	56.72	Bubovice	50242.6	53561.1
Bellerophontidae	Ptychosphaera_constricta	422.1	-52.93	58.36	Praha-Jinovice	29.1648	53561.1
Bellerophontidae	Prosoptychus_globulus	422.1	-52.93	58.36	Praha-Jinovice	1241.18	53561.1
Bellerophontidae	Prosoptychus_sphaera	427.2	-21.64	-2.77	VisbyArea,variousbedsfromcoastfromBbeds	2693.75	53561.1
Bellerophontidae	Coelocyclus_rarissimus	400.5	-34.51	46.69	St.ProkopQuarry,HlubocepyValley	10676.9	16900
Bellerophontidae	Kodymites_nestor	410.7	-40.98	49.75	St.ProkopQuarry	6344.44	16900
Bellerophontidae	Aglaoglypta_maera	379.9	-25.92	-56.72	IslandMesaTank,YavapaiCounty	223669	294858
Bellerophontidae	Retispira_leda	385.9	-36.52	-26.09	BCVS1-10,BuffaloCreek,WanakahShale,ErieCo.,NY	5813.74	294858
Bellerophontidae	Bellerophon_lineatus	385.9	-22.54	8.17	GastropodsoftheLahnBasinLimestones:Oranienstein	11381.2	294858
Bellerophontidae	Bellerophon_newberryi	385.9	-33.24	-29.17	ThunderBayRiveratNorwayPointDam	885.209	294858
Bellerophontidae	Bellerophon_pelops	385.9	-23.37	-36.37	Locality1,2mi.westofNinaLakealongroadtoTheNarrows,LakeManitoba	54043.5	294858
Bellerophontidae	Bellerophon_spergensis	340.5	5.19	-40.46	Unit81,StormCreekSection,Member3,MountHeadFm	279653	319364
Bellerophontidae	Retispira_textilis	340.5	5.19	-40.46	Unit81,StormCreekSection,Member3,MountHeadFm	38429.4	319364
Bellerophontidae	Teutonophon_tangentialis	345.15	-9.53	0.46	WeaverHillsDistrict,CauldonLowLimestone	53722.8	319364
Bellerophontidae	Retispira_culleni	353	-33.93	143.78	SwainsGully(YooLoc.25).250mwestofofBabbinboonLane	310.788	319364
Bellerophontidae	Retispira_cincta	322.25	-12.27	-34.15	Loc.3.USGS15301.BearCreekatSulphurSpringsHollow,ARSH-27	9383.52	1252590
Bellerophontidae	Retispira_exilis	322.25	9.91	66.62	Q2-h-158,neartheroad,3.5kmsoutheastofChenmajiging,Zhongning	1218030	1252590
Bellerophontidae	Bellerophon_welshi	322.25	-12.38	-34.01	Loc.1.USGS14369.RoadcutonsesideUS65,0.8kmswofPeytonCreekBridge	22.6055	1252590
Bellerophontidae	Retispira_yochelsoni	322.25	-12.27	-34.15	Loc.3.USGS15301.BearCreekatSulphurSpringsHollow,ARSH-27	112.042	1252590
Bellerophontidae	Patellilabia_chesterensis	328.75	-12.09	-31.63	SouthBranchCampCreek,2.75milessouthofRuma	1933.61	1252590
Bellerophontidae	Retispira_ornatus	328.75	-12.09	-31.63	SouthBranchCampCreek,2.75milessouthofRuma	336.759	1252590
Bellerophontidae	Cymatospira_welleri	328.75	-12.09	-31.63	SouthBranchCampCreek,2.75milessouthofRuma	83.6516	1252590
Bellerophontidae	Bellerophon_costatus	331.2	-6.37	4.84	CliffQuarry,450yardsW27&730;SofComptonMartinChurch,ComptonMartin,Mar	53787.9	1252590
Bellerophontidae	Bellerophon_hiulcus	331.2	-4	3.62	Bolland,Yorkshire(=Queensbury,Bradford)	77986.1	1252590
Bellerophontidae	Bellerophon_tenuifascia	331.2	-4	3.62	Bolland,Yorkshire(=Queensbury,Bradford)	77986.1	1252590
Bellerophontidae	Bellerophon_crassus	299.2	-7.1	-16.04	AmesShale,GarrettCounty	456142	925390
Bellerophontidae	Bellerophon_graphicus	299.2	-1.86	-37.58	beds39-40,Milepost5roadcutsection	317869	925390
Bellerophontidae	Cymatospira_montfortianus	299.2	-7.1	-16.04	AmesShale,GarrettCounty	741499	925390
Bellerophontidae	Pharkidonotus_percarinatus	299.2	-4.46	-22.74	TypelocalitityofShumwayLimestoneMember,MatttoonFm.,ShumwayCyclothem	554970	925390
Bellerophontidae	Retispira_tenuilineata	299.2	-1.86	-37.58	bed31,milepost5roadcutsection	220092	925390
Bellerophontidae	Bellerophon_wewokanus	309.85	-7.05	-32.25	C-796.2	5264.54	925390
Bellerophontidae	Yochelsonellisa_eximia	284.8	-1.34	-30.91	USGS9802,SofHighway67,Coleman	28282.3	47002
Bellerophontidae	Bellerophon_huecoensis	284.8	0.8	-35.01	AMNH626,VictorioCanyon,SierraDiablo	7087.47	47002
Bellerophontidae	Bellerophon_parvicristus	284.8	2.57	-35.77	USNM712,Orogrande	40465.1	47002
Bellerophontidae	Yochelsonellisa_eximia	292.55	0.24	-37.2	RobledoMountainsUNM-1465	124.351	47002
Bellerophontidae	Bellerophon_parvicristus	292.55	-3.24	-36	USNM707o,LenoxHillsFormation,LenoxHills,GlassMountains	4023.05	47002
Bellerophontidae	Waagenella_jonesianus	262	-14.65	103.64	PhnomAngkor,Battambang	4476900	5815880
Bellerophontidae	Bellerophon_deflectus	265.75	3.24	-33.54	USGS2935green,southernDelawareMountains	1397.04	5815880
Bellerophontidae	Bellerophon_deflectus	270.25	9.22	-36.57	BottomlessPits,Bed2,KaibabFormation,WalnutCanyon	276584	5815880
Bellerophontidae	Bellerophon_hilli	270.25	1.36	-33.14	AMNH503,OldWordRanch,GlassMountains	10567	5815880
Bellerophontidae	Bellerophon_kingorum	270.25	1.38	-33.17	USNM706c,HessCanyon,GlassMountains	327.573	5815880
Bellerophontidae	Retispira_lyelli	270.25	1.37	-33.34	USNM707e,SullivanPeak,GlassMountains	665591	5815880
Bellerophontidae	Retispira_modesta	270.25	1.36	-33.14	USNM703,OldWordRanch,GlassMountains	27017.4	5815880
Bellerophontidae	Patellilabia_junior	276	0.87	-30.23	USGS9862,ElmCreek,RunnelsCounty	26.4514	5815880
Bellerophontidae	Waagenella_lineatus	276	0.72	-30.2	B.E.G.199-T7-P19-1.3A15,HerringsBluff,ColoradoRiver,RunnelsCounty	73.6023	5815880
Bellerophontidae	Bellerophon_majusculus	276	2.41	-29.73	CrotonFalls,StonewallCounty	2532.41	5815880
Bellerophontidae	Knightites_maximus	276	0.66	-30.23	B.E.G.199-T13-P22,PonyCreek,RunnelsCounty	47.5348	5815880
Bellerophontidae	Bellerophon_parvicristus	276	1.05	-33.51	USNM708e,LenoxHills,GlassMountains	79451.9	5815880
Bellerophontidae	Dicellonema_abrekensis	251.8	40.95	110.39	AbrekBayAB1012	18100000	18621300
Bellerophontidae	Bellerophon_affinis	253.15	-41.31	56.44	KhundGhat,UpperProductus-limestone,SaltRange(Wynnecoll)	5333.5	18621300
Bellerophontidae	Retispira_angustifasciata	253.15	-40.95	56.28	Chidru,topmostProductusLimestone,SaltRange	1032.38	18621300
Bellerophontidae	Bellerophon_blanfordianus	253.15	-40.95	56.28	Chidru,UpperProductus-limestone,SaltRange	91153.3	18621300
Bellerophontidae	Bellerophon_equivicalus	253.15	-41.08	56.32	HillslopesbetweentributariesofBaralNala,EofChapri,SaltRange	1652.21	18621300
Bellerophontidae	Retispira_integra	253.15	-41.25	56.34	Virgal,topmostbedsofUpperProductus-limestone,SaltRange	316.249	18621300
Bellerophontidae	Waagenella_jonesianus	253.15	-41.13	56.32	Bridle-pathtoUchhalineardivideaboveKumaranwalidhok,SaltRange	380240	18621300
Bellerophontidae	Bellerophon_orientalis	253.15	-41.13	56.32	Bridle-pathtoUchhalineardivideaboveKumaranwalidhok,SaltRange	3908.73	18621300
Bellerophontidae	Bellerophon_politus	253.15	-41.31	56.44	KhundGhat,UpperProductus-limestone,SaltRange(Wynnecoll)	155.18	18621300
Bellerophontidae	Mogulia_regularis	253.15	-40.84	56.44	SSWofpt2338,NNEofGhundi,sandybed,SaltRange	840.681	18621300
Bellerophontidae	Bellerophon_roemeri	253.15	-40.95	56.28	Chidru,topmostProductusLimestone,SaltRange	10506	18621300
Bellerophontidae	Bellerophon_squamatus	253.15	-40.99	56.32	Banschang,EofChhidru,no3bed,K31.379-390,SaltRange	11467.3	18621300
Bellerophontidae	Bellerophon_triangularis	253.15	-40.95	56.28	Chidru,UpperProductus-limestone,SaltRange	14133.6	18621300
Bellerophontidae	Pharkidonotus_acutocarinatus	255.65	-42.62	56.01	0.75milesSSWofSodhiZairin,K28.891,904-910,SaltRange	735.107	18621300
Bellerophontidae	Pharkidonotus_khairliensis	255.65	-42.62	55.87	SEsideofJabbigorge,SEofpt2900,SaltRange	328.907	18621300
Auloporida	Fletcheriella_gigantica	446.6	15.47	-4.7	SukhoyRiver,SetteDabanMountains,unit1	1812820	3001080
Auloporida	Troedssonites_conspiratus	446.6	15.47	-4.7	SukhoyRiver,SetteDabanMountains,unit5	1549350	3001080
Auloporida	Cannapora_junciformis	437.5	-23.91	-47.42	MinkCreek&Brasser-Reynales	6.20493	6.20493
Auloporida	Romingeria_niagarensis	432.6	4.04	-61.19	SandpileGroup,GSC35165	1.22794	2745.07
Auloporida	Syringopora_verticillata	432.6	8.57	-71.28	SandpileGroup,GSC35164	2686.05	2745.07
Auloporida	Syringopora_novella	425.55	33.44	15.42	Atrypa-LeptaenaCommunity	49762.4	49762.4
Auloporida	Syringopora_fascicularis	420	1.4	12.74	BankovyiHorizon,Kolpakovo,Barabanovo,Kamensk-Ural'skii,MiddleUrals,Russia	876104	876104
Auloporida	Roemeripora_progenitor	400.5	-13.17	174.17	Benny'sTopsarea	220839	220839
Auloporida	Syringopora_eifeliensis	390	0.13	119.43	DaleandZhongpingVillages,Section2,Loc.35	3049940	3058320
Auloporida	Syringopora_hanshanensis	390	-23.53	8.05	Gr?newiesequarry,Sauerland,Germany	8441.74	3058320
Auloporida	Aulocystis_auloporoidea	385.9	-36.41	-30.96	SilicaFormationUnit1	140.343	37338.4
Auloporida	Aulocystis_jacksoni	385.9	-36.52	-26.09	BCVS1-4b,BuffaloCreek,WanakahShale,ErieCo.,NY	28874.9	37338.4
Auloporida	Aulocystis_lucasensis	385.9	-36.41	-30.96	SilicaFormationUnit5A	1966.21	37338.4
Auloporida	Aulopora_microbuccinata	385.9	-36.52	-26.09	BCVS1-7,BuffaloCreek,WanakahShale,ErieCo.,NY	4308.98	37338.4
Auloporida	Aulopora_serpens	385.9	-22.99	7.27	Tabulates,S?tenichSyncline,LooghFm.,Germany	31931.9	37338.4
Auloporida	Planalveolitella_parasitica	385.9	-36.41	-30.96	SilicaFormationUnit7(7A,7B,7C)	855.22	37338.4
Auloporida	Aulocystis_tikhyi	379.9	-18.24	30.63	Sitkowka-KowalaQuarry,unitC	1938.37	1938.37
Auloporida	Syringopora_surcularia	351.75	-9.69	-51.72	DutchJohnMountain	7201.81	7201.81
Auloporida	Cladochonus_beecheri	345.15	-18.9	-32.82	BoyScoutCamp,IU15109-1000,EdwardsvilleFm.,MonroeCo.,IN	4056.36	9057.95
Auloporida	Cladochonus_crassus	345.15	-21.25	-32.87	FortPayneFm.,HarmonCreeklocality,H3-A3.5,WayneCo.,KY	5000.88	9057.95
Auloporida	Cladochonus_beecheri	340.5	-18.2	-32.66	SalemLs.,TaylorandGreenCos.,KY	820.543	884.931
Auloporida	Syringopora_monroensis	340.5	-17.63	-32.69	SomersetSh.Member,SalemLs.,IU16712,HardinCo.,KY	42.7143	884.931
Auloporida	Syringopora_virginica	340.5	-19.89	-30.56	LittleValleyLimestone(overview)	29.8931	884.931
Auloporida	Roemeripora_wimani	294.5	30.93	13.4	Treskelen,CH1a,Hornsund,UpperTreskeloddenBeds,Spitsbergen	0.682871	42948.3
Auloporida	Syringopora_quadriserialis	294.5	30.93	13.4	Treskelen,CH5c,Hornsund,UpperTreskeloddenBeds,Spitsbergen	0.682871	42948.3
Auloporida	Neosyringopora_multattenuata	296.95	6.82	-40.83	LACMIP1255,LeeCanyon	42942.3	42948.3
Auloporida	Hayasakaia_elegantula	276	2.59	97.96	Yangtiantang,Bed4,Guankou,GuichiCounty	47159.7	1012630
Auloporida	Hayasakaia_infundibula	276	2.59	97.96	Yangtiantang,Bed4,Guankou,GuichiCounty	119778	1012630
Auloporida	Hayasakaia_raricystata	276	2.59	97.96	Yangtiantang,Bed5,Guankou,GuichiCounty	74960.8	1012630
Auloporida	Hayasakaia_syringoporoides	276	3.24	96.75	Pingdingshan,Bed10,ChaohuCity	393543	1012630
Auloporida	Multithecopora_dendroidea	276	3.24	96.75	Pingdingshan,Bed10,ChaohuCity	686498	1012630
Auloporida	Multithecopora_dendroidea	270.25	-25.43	58.77	BashlangSettlement,Musa-KalaRiverValley	839660	839660
Auloporida	Sinopora_asiatica	266.5	-9.11	41.73	Kuh-eAliBashi,Jolfa,GnishikFormation	4086050	4086050
Auloporida	Sinopora_asiatica	262	-45.48	55.83	SaltRange,LowerWargalFormation	22357.6	22357.6
Cystoporida	Eridopora_inaudita	253.15	39.81	110.76	NakhodkaReef,upperquarry	39438.1	1865740
Cystoporida	Fistulipora_timorensis	253.15	37.39	113.35	Arsen'evkiRiver,RightTributaryNorthofMariyanovkaVillage,Primorye	33952.4	1865740
Cystoporida	Hexagonella_ramosa	253.15	37.39	113.35	Arsen'evkiRiver,RightTributaryNorthofMariyanovkaVillage,Primorye	1743690	1865740
Cystoporida	Dybowskiella_grandis	256.5	34.62	80.52	HajierFormation,southQilianMts	435680	33176100
Cystoporida	Eridopora_parasitica	256.5	-42.76	55.68	Chidru,topmostMiddleProductus,SaltRange	729.215	33176100
Cystoporida	Fistulipora_elegantula	256.5	-23.28	50.37	Abadeh,SectionH,HambastMountains	18500000	33176100
Cystoporida	Fistulipora_jakovlevi	256.5	-2.64	39.43	Arpa-ChayRiver,Transcaucasus	1014.23	33176100
Cystoporida	Fistulipora_timorensis	256.5	37.56	113.3	Babstovo,LyudyanzaFormation,BolshieChurkirange,KhabarovskRegion	16500000	33176100
Cystoporida	Hexagonella_ramosa	256.5	-42.47	54.94	Bilot,KalabaghBeds,KhisorRange	9662390	33176100
Cystoporida	Eridopora_oculata	262	-22.75	47.98	LaKaftari,Esfahan	748506	33176100
Cystoporida	Etherella_crassa	262	30.35	111.51	TavayzaBay,ArtemovRegion	333.595	33176100
Cystoporida	Fistulipora_hangchouensis	262	30.41	110.88	BarabashLimestoneQuarry,BarabashRiver	25430.5	33176100
Cystoporida	Fistulipora_octonaria	262	23.06	105.62	S124,Shigeyasu,AkiyoshiLimestone	92469.4	33176100
Cystoporida	Fistulipora_tchurkensis	262	30.41	110.88	BarabashLimestoneQuarry,BarabashRiver	13570.1	33176100
Cystoporida	Prismopora_triangulata	262	30.41	110.88	BarabashevkaRiver,MiddleChandalaz,Primorye	4647.59	33176100
Cystoporida	Eridopora_parasitica	265.75	-26.92	95.54	KhaoHinKling,LocalityK(860810-04)	83108.9	3609910
Cystoporida	Fistulipora_guadalupensis	265.75	3.3	-33.49	USGS2957green,southernDelawareMountains	112.073	3609910
Cystoporida	Fistulipora_timorensis	265.75	-26.92	95.54	KhaoHinKling,LocalityK(860810-04)	1983390	3609910
Cystoporida	Cyclotrypa_multiformis	270.25	28.85	41.52	Atary,VyatkaRiver,KirovRegion	67770.8	3609910
Cystoporida	Fistulipora_basleoensis	270.25	31.64	110.55	NesterovkaRiver,VladivostokHorizon,Primorye	155.535	3609910
Cystoporida	Fistulipora_dybowskii	270.25	33.9	32.29	Dolgoshchel'yeVillage,KuloyRiver,ArkhangelRegion	143262	3609910
Cystoporida	Fistulipora_guadalupensis	270.25	3.35	-33.65	USGS2919green,ElCapitan,GuadalupeMountains	207.735	3609910
Cystoporida	Goniocladia_timorensis	270.25	-27.9	61.17	AliSang,SectionB'',PremiersHorizonsGreso-Calcaires,Wardak	2046060	3609910
Cystoporida	Fistulipora_sinensis	276	-2.38	93.94	BY84,Liushutang,Maanshanarea	125884	125884
Cystoporida	Coscinium_cyclops	284.8	32.46	31.84	BelayaRiver,Artinskian,northernTiman	7100.7	308161
Cystoporida	Fistulipora_volongensis	284.8	32.84	1.43	GreatBearCape(StoreBjornekap),EllesmereIsland	67891	308161
Cystoporida	Hexagonella_petschorica	284.8	32.32	32.52	SulaRiver,Artinskian,NorthernTimanMountains	1745.03	308161
Cystoporida	Ramiporidra_variolata	284.8	32.84	1.43	GreatBearCape(StoreBjornekap),EllesmereIsland	623.846	308161
Cystoporida	Coscinium_cyclops	292.55	29.97	29.46	BelayaRiver,Sakmarian,NorthernTimanMountains	166015	308161
Cystoporida	Fistulipora_carbonaria	292.55	1.68	-26.25	ML03LLLH,MarshallCounty	7082.46	308161
Cystoporida	Fistulipora_incrustans	292.55	1.68	-26.25	ML03LLLH,MarshallCounty	64347	308161
Cystoporida	Fistulipora_volongensis	292.55	29.85	30.13	SulaRiver,Sakmarian,NorthernTimanMountains	160.808	308161
Cystoporida	Meekopora_prosseri	292.55	1.59	-26.19	GE01UMSh,GearyCounty	29096.5	308161
Cystoporida	Goniocladia_peruviana	294.5	-27.93	-49.89	AMNH297,Bed13a,CerroAmp?ysection7,Abanc?y	4848.44	8783.07
Cystoporida	Fistulipora_volongensis	296.95	30.14	29.37	Nariyan-MarWellP-1,Asselian,MalozemelskayaTundra	3934.25	8783.07
Cystoporida	Prismopora_triangulata	309.85	-5.77	-30.04	USGS7750-CrawfordCo.,Kansas	6720.75	6720.75
Cystoporida	Fistulamina_dispersa	322.25	-43.14	153.58	UQL2082,Yarrol	141.597	141.597
Cystoporida	Fistulipora_excellens	327.05	-13.03	-28.65	Locality1,GolcondaFormation,PerryCo.,Indiana	124.026	124.029
Cystoporida	Fistulipora_perdensa	327.05	-13.03	-28.65	Locality1,GolcondaFormation,PerryCo.,Indiana	77.9219	124.029
Cystoporida	Fistulipora_incrustans	335.85	-7.18	7.64	Westenfeld,Sauerland	19805.5	20084.7
Cystoporida	Goniocladia_cellulifera	335.85	-7.18	7.64	Westenfeld,Sauerland	247.95	20084.7
Cystoporida	Cystodictya_lineata	340.5	-17.65	-32.67	SomersetSh.Member,SalemLs.,IU16713,HardinCo.,KY	280.235	20084.7
Cystoporida	Fistulipora_spergenensis	340.5	-17.63	-32.69	SomersetSh.Member,SalemLs.,IU16712,HardinCo.,KY	146.522	20084.7
Cystoporida	Cyclotrypa_cyclostoma	385.9	-23.02	7.5	Br?hlbornnearRommersheim,Pr?mSyncline,M?llertSubformation	1274950	1284070
Cystoporida	Sulcoretepora_deissi	385.9	-36.41	-30.96	SilicaFormationUnit5B	856.772	1284070
Cystoporida	Sulcoretepora_incisurata	385.9	-39.28	-25.3	Unit9,MontebelloMember,MahantangoFm.,Rockville,PerryCo.,PA	6149.59	1284070
Cystoporida	Sulcoretepora_obliqua	385.9	-45.93	5.32	SabkhatLafyrinareefcomplex,TindoufBasin,Terguetarea	55437.1	1284070
Cystoporida	Cyclotrypa_communis	398.6	-41.9	31.74	CaldasdeLuna,SantaLuciaFm,SampleRGM211-541andRGM211-544	678.958	678.958
Cystoporida	Fistulipora_hennigi	417.35	-16.98	3.75	Lepidoleptaenapoulseni-HennigoporaflexuosaComm.,KantinovoFm.,SWByelorussia	150.31	16093.2
Cystoporida	Fistulipora_incerta	417.35	-18.59	6.47	DzwinogorodBedsatS-DboundarysectionsinDniestrValley	15934.6	16093.2
Cystoporida	Fistulipora_incomperta	417.35	-16.98	3.75	Dayiabohemica-AnisotrypacallosaComm.,KustinFormation,SWByelorussia	150.31	16093.2
Cystoporida	Fistulipora_crustula	425.55	-26.79	-45.06	NiagaraGorge-RochesterShale120-124feet	6701.65	6701.65
Euomphalidae	Leptomphalus_pusillus	253.15	-41.04	56.26	Eastofpt2263,ESEofChhidru,Chhidruzone,SaltRange	2346.5	388957
Euomphalidae	Euomphalus_uedai	253.15	34.67	117.84	Iwanosawa,Locality12,Senmatsu	1070.84	388957
Euomphalidae	Euomphalus_parvus	256.5	-43.07	55.92	Khura,compactlimestones,MiddleProductus-limestone,SaltRange	124.28	388957
Euomphalidae	Cylicioscapha_khmeriana	262	-13.9	103.44	PhnomTakream,Battambang	388815	388957
Euomphalidae	Planotectus_cymbellatus	270.25	1.38	-33.17	USNM706c,HessCanyon,GlassMountains	1975.67	674847
Euomphalidae	Euomphalus_kaibabensis	270.25	9.22	-36.57	BottomlessPits,Bed2,KaibabFormation,WalnutCanyon	64621.5	674847
Euomphalidae	Euomphalus_levicarinatus	270.25	1.36	-33.14	USNM703,OldWordRanch,GlassMountains	304.679	674847
Euomphalidae	Discotropis_publicus	270.25	1.38	-33.17	USNM706c,HessCanyon,GlassMountains	257.313	674847
Euomphalidae	Discotropis_sulcifer	270.25	1.36	-33.14	USNM703,OldWordRanch,GlassMountains	2817.71	674847
Euomphalidae	Euomphalus_cornudanus	276	3.51	-34.58	AMNH391,RuddyTank,HuecoMountains	197318	674847
Euomphalidae	Amphiscapha_gigantea	276	0.78	-30.17	USGS9848,MustangCreek,RunnelsCounty	213.421	674847
Euomphalidae	Euomphalus_glabribasis	276	2.64	-34.06	USNM716,VictorioPeak,SierraDiablo	16.6011	674847
Euomphalidae	Amphiscapha_proxima	276	14.32	-36.27	ButteMountains,Unit5	76349.6	674847
Euomphalidae	Amphiscapha_proxima	292.55	0.24	-37.2	RobledoMountainsL-03018	2704.86	211354
Euomphalidae	Amphiscapha_muricata	296.95	-0.57	-27.09	USGSLoc.13711,BurrLSmember,GrenolaLSformation	62852.1	211354
Euomphalidae	Amphiscapha_catilloides	299.2	-6	-33.31	Gunsight,WaylandShale	40394.6	211354
Euomphalidae	Amphiscapha_subrugosa	299.2	-4.53	-22.75	ShumwayCyclothem,MattoonFm.,Unit10	124420	211354
Euomphalidae	Euomphalus_marginatiformis	301.7	15.2	31.63	Locality006.SectionneartheGzhelstation,Bed8	886.323	211354
Euomphalidae	Nodeuomphalus_moniliferus	301.7	15.17	31.64	Locality008.Outcropnearthe55kmstation	1764.77	211354
Euomphalidae	Amphiscapha_marginatus	307.975	13.44	29.7	Locality039.Zamoskvorechye,researchofmetro	791.531	211354
Euomphalidae	Amphiscapha_catilloides	308.5	-7.99	-21.42	Springfield,OH	116828	120893
Euomphalidae	Amphiscapha_subrugosa	309.85	-5.77	-29.72	Loc.1A.Wastebanksofstripmine1.5mileswestofMindenmines,1milenorthfromKS-MOstatelineroad	21750.1	120893
Euomphalidae	Euomphalus_konobasis	322.25	-12.27	-34.15	Loc.3.USGS15301.BearCreekatSulphurSpringsHollow,ARSH-27	17.1539	120893
Euomphalidae	Euomphalus_variabilis	322.25	-12.27	-34.15	Loc.3.USGS15301.BearCreekatSulphurSpringsHollow,ARSH-27	82.6066	120893
Euomphalidae	Euomphalus_planodorsatus	328.75	-12.08	-31.62	TributarytoCampCreek,1.75milessouthofRuma	444.583	1338030
Euomphalidae	Euomphalus_similis	328.75	-10.87	-28.88	BedNo.8,FountainCreek,2milessouthwestofWaterloo	154021	1338030
Euomphalidae	Euomphalus_catillus	331.2	-6.37	4.84	CliffQuarry,450yardsW27&730;SofComptonMartinChurch,ComptonMartin,Mar	1063730	1338030
Euomphalidae	Phanerotinus_cristatus	331.2	-4	3.62	Bolland,Yorkshire(=Queensbury,Bradford)	8679.7	1338030
Euomphalidae	Straparollus_levigatus	331.2	-6.37	4.84	CliffQuarry,450yardsW27&730;SofComptonMartinChurch,ComptonMartin,Mar	4049.87	1338030
Euomphalidae	Euomphalus_pentangulatus	337.7	-6.43	1.6	Castletonarea,marginalshelfandbackreef	5.87134	1338030
Euomphalidae	Straparollus_spergenensis	340.5	-18.08	-32.49	SalemLs.,Ooliticbeds,TaylorCo.,KY	110556	1338030
Euomphalidae	Straparollus_davidi	353	-33.93	143.78	SwainsGully(YooLoc.25).250mwestofofBabbinboonLane	338.693	344.834
Euomphalidae	Araeonema_microspirulata	353	-34.84	144.58	GlenBawn.YooLoc.29,1.7kmeastofGlenbawnDam	279.28	344.834
Euomphalidae	Straparollus_serpens	377.8	-18.72	31.4	GrabinaSection,SetC,upperBeds	3833.49	890737
Euomphalidae	Straparollus_laevis	385.9	-22.47	8.27	GastropodsoftheLahnBasinLimestones:Villmar	884318	890737
Euomphalidae	Pleuronotus_decewi	390	-39.52	-21.62	EasternArea,Berne,SchoharieandAlbanyQuadrangles,OnondagaLimestone,NY	2127.74	2127.74
Euomphalidae	Euomphalopterus_aliger	417.35	-48.88	55.37	Lochkov	4335.28	10005500
Euomphalidae	Poleumita_octavia	419.45	-7.36	-66.33	GrouseCreek,KlamathMountains	1911420	10005500
Euomphalidae	Poleumita_discors	420	-16.54	-2.22	longwallonKaupungsklintHillock,Ardre	5977710	10005500
Euomphalidae	Centrifugus_planorbis	420	-16.54	-2.22	longwallonKaupungsklintHillock,Ardre	48545.4	10005500
Euomphalidae	Euomphalopterus_valeria	420.8	-27.72	-43.27	Eurypterid-associatedbiotaofthedolomiteoftheLockportFmn.atElora,Ont.	2354.78	10005500
Euomphalidae	Euomphalopterus_alatus	422.1	-22.68	7.1	Orynin	4649460	10005500
Euomphalidae	Straparollus_mopsus	422.1	-25.39	-49.39	RacineFm,SEWisconsin,IvesQuarry-Patzkowsky	1839.54	10005500
Euomphalidae	Poleumita_rugosa	422.1	-22.68	7.1	Orynin	542866	10005500
Euomphalidae	Poleumita_walmstedti	422.1	-18.68	-2.46	SandarveKulle,steephillock1kmnorthofFardhemChurch	10792.2	10005500
Euomphalidae	Euomphalopterus_alatus	431.1	-23.47	-3.24	UpperVisbyBeds:Fossilsofreeflimestone(Manten1971,TableIX)	517502	517502
Euomphalidae	Linsleyella_spinosa	455.2	-24.95	-54.96	CobourgHill(S6)No1,westrailway-cut,lot15,LakeSimcoearea	1034.07	1034.07
Cystiphyllida	Tryplasma_cylindrica	435.95	-26.84	-54.82	CoralsofBrassfieldFm,mid-Llandovery,1-Patzkowsky	8.25747	8.25747
Cystiphyllida	Palaeocyclus_rotuloides	432.1	-23.54	-35.23	ChaleursGroup,GaspePeninsula,AnseaPierreFm,95000-Patzkowsky	1144.17	1144.17
Cystiphyllida	Cystiphyllum_cylindricum	425.55	-0.68	4.39	KozhymRiver,PripolyarnyyUral	1079550	1089550
Cystiphyllida	Cystiphyllum_niagarense	425.55	-27.06	-44.37	Favosites-MassiveSTromatoporoidBiohermCommunityoftheGasportLimestone	2518.01	1089550
Cystiphyllida	Tryplasma_loveni	419.45	-19.91	7.49	DidymothyrisdidymaCommunity,Podolia	470598	470624
Cystiphyllida	Tryplasma_formosa	417.35	-18.4	7.04	ProetusscalicusCommunity,midVarnitsasuite,Podolia	26.8552	470624
Cystiphyllida	Tryplasma_aequabilis	414.15	-7.72	74.15	KunjakStage,Unit26,IsfaraRiverS-DSection	470174	470624
Cystiphyllida	Tryplasma_altaica	410.7	6.31	127.81	SongHiem,MiaLeBeds	135063	135063
Cystiphyllida	Calceola_sandalina	405.8	2.17	125.69	DaleandZhongpingVillages,Section2,Loc.3	29129	29129
Cystiphyllida	Tryplasma_aequabilis	398.6	6.46	131.04	NamPia,LowerBanPapBeds	729994	729994
Cystiphyllida	Calceola_sandalina	395.3	-42.76	36.26	Locality92DevonianfaunafromtheupperSantaLuciaFm,Leon,NWSpain	20100000	20100000
Cystiphyllida	Calceola_sandalina	390	0.13	119.43	DaleandZhongpingVillages,Section2,Loc.35	26000000	26156600
Cystiphyllida	Cystiphylloides_americanum	390	-38.95	-23.5	CentralArea,ZoneB(Amphigeniazone),OnondagaLimestone,NY	1620.73	26156600
Cystiphyllida	Cystiphylloides_duplicatum	390	-23.46	8.07	Springespringblocks,Sauerland,Germany	11430.2	26156600
Cystiphyllida	Lekanophyllum_mediale	390	-11.45	-43.14	GasKegRidge	21495.2	26156600
Cystiphyllida	Microplasma_caespitosum	390	-4.53	-36.74	HumeFm.GSClocalityC-25839	72019.3	26156600
Cystiphyllida	Zonophyllum_petilum	390	-4.58	-36.72	HumeFm.GSClocalityC-3871	21874.6	26156600
Cystiphyllida	Calceola_sandalina	385.25	-36.8	28	Locality120GivetianfaunafromthetopPortillaFm,Leon,NWSpain	17600000	25788500
Cystiphyllida	Cystiphylloides_macrocystis	385.25	-36.8	28	Locality120GivetianfaunafromthetopPortillaFm,Leon,NWSpain	1587800	25788500
Cystiphyllida	Cystiphylloides_secundum	385.25	-36.8	28	Locality120GivetianfaunafromthetopPortillaFm,Leon,NWSpain	15700000	25788500
Cystiphyllida	Mesophyllum_maximum	385.25	-36.8	28	Locality120GivetianfaunafromthetopPortillaFm,Leon,NWSpain	314083	25788500
Cystiphyllida	Cystiphylloides_americanum	385.9	-36.88	-23.73	Sample50(CenterfieldMember,LudlowvilleFormation),Locality5(SweetRoadro	34386.2	25788500
Cystiphyllida	Cystiphylloides_crassiseptatum	385.9	14.09	61.36	Kul'tukkenMountains,Chingiz-KaraaulDistrict	39729	25788500
Desmoceratidae	Spitidiscus_rotula	133.2	34.42	16.02	Unit13(Hauterivien)-PointSublimeduRougon	11907.6	466521
Desmoceratidae	Plesiospitidiscus_ligatus	133.2	34.42	16.02	Unit14(Hauterivien)-PointSublimeduRougon	6.12535	466521
Desmoceratidae	Subsaynella_sayni	133.2	34.42	16.02	Unit14(Hauterivien)-PointSublimeduRougon	4612.77	466521
Desmoceratidae	Abrytusites_neumayri	133.2	25.26	-4.3	Addarsection,bed80[TaboulouartFm]	357831	466521
Desmoceratidae	Plesiospitidiscus_subdifficilis	133.2	29.13	6.7	ArroyodeGilico(X.V1),Crioceratitesangulicostatussubzone,Cehegin,Murcia	1612.41	466521
Desmoceratidae	Abrytusites_julianyi	133.2	29.31	25.24	Marvany-banyaquarry,Zirc,BakonyMts,VeszpremMegye	97134.1	466521
Desmoceratidae	Barremites_difficilis	127.725	-5.87	45.52	Georgia4	340123	432060
Desmoceratidae	Torcapella_barremensis	127.725	24.89	-3.95	Imsouanesection,bed26[TaboulouartFm]	289.793	432060
Desmoceratidae	Barremites_vocontius	127.725	24.89	-3.95	Imsouanesection,bed36[TaboulouartFm]	289.793	432060
Desmoceratidae	Torcapella_suessi	127.725	24.89	-3.95	Imsouanesection,bed36[TaboulouartFm]	73.8784	432060
Desmoceratidae	Barremites_strettostoma	127.725	34.05	16.33	Unit19(Barremian)-Castagne(WofBargeme)	55.7209	432060
Desmoceratidae	Pseudohaploceras_matheroni	119.025	27.99	6.46	24.8m-SectionX.HA(CortijodelHielo)	93.5616	93.5616
Desmoceratidae	Melchiorites_melchioris	117.53	8.21	-32.63	4.5kmEofCumanacoa[ValleGrandeFm]	3994920	3994920
Desmoceratidae	Desmoceras_latidorsatum	110.8	-0.64	-45.34	AlbianOliniCreek14	10700000	10700000
Desmoceratidae	Desmoceras_latidorsatum	106.15	-40.26	31.48	Ambarimaninga	11700000	12546300
Desmoceratidae	Puzosia_quenstedti	106.15	-40.26	31.48	Ambarimaninga	1730200	12546300
Desmoceratidae	Grantziceras_affine	106.15	66.36	-64.36	FortNorman-FortGoodHope,McKenzieRiverValley	223331	12546300
Desmoceratidae	Grantziceras_glabrum	106.15	66.36	-64.36	FortNorman-FortGoodHope,McKenzieRiverValley	79479.5	12546300
Desmoceratidae	Beudanticeras_newtoni	106.15	39.29	4.71	SXfspf,WestWindsPoultryFarm[Folkestone,LowerGreensand]	17359.6	12546300
Desmoceratidae	Desmoceras_latidorsatum	102.5	-37.75	36.39	Androiavy,unit4	35300000	47603800
Desmoceratidae	Puzosia_mayoriana	102.5	34.61	8.7	BaseCalcairesdesFiz,Fiz,MassifdePlat?,Haute-Savoie	124220	47603800
Desmoceratidae	Beudanticeras_beudanti	102.5	34.61	8.34	BasecouchesduFreu,ColdeFreu,MassifdesBornes,Haute-Savoie	7041050	47603800
Desmoceratidae	Desmoceras_dawsoni	102.5	23.46	-109.09	GSCLoc.137606,BeresfordCreek[HaidaFm]	12300000	47603800
Desmoceratidae	Desmoceras_latidorsatum	97	34.95	7.29	Bargyconglomerate,Commanderie2,massifdesBornes,Haute-Savoie	25500000	35082900
Desmoceratidae	Puzosia_mayoriana	97	35.09	7.66	CalcairesdeFiz,ChaletduCriou,Haut-Giffre,Haute-Savoie	336062	35082900
Desmoceratidae	Desmoceras_japonicum	97	59.97	-88.21	USGSLoc.M1292,YoungsLakes	6907070	35082900
Desmoceratidae	Desmoceras_kossmati	97	69.44	174.62	Member3,NaibaFm	34442.8	35082900
Desmoceratidae	Desmoceras_scotti	97	37.43	-72.89	MNALoc296:BM4	292.255	35082900
Desmoceratidae	Moremanoceras_elgini	97	31.07	-69.12	CherryRanch,JeffDavisCo.[BudaLimestone]	88649	35082900
Desmoceratidae	Mesopuzosia_yubarensis	91.8	52.01	134.46	Obatalocality8,loc,ob.00103p	26736.5	1824790
Desmoceratidae	Damesites_ainuanus	91.8	52.09	134.44	R2003-Obira(SakuFormation)	508849	1824790
Desmoceratidae	Mesopuzosia_pacifica	91.8	52.09	134.44	R2113-Obira(SakuFormation)	684.91	1824790
Desmoceratidae	Pachydesmoceras_denisonianum	91.8	-16.93	-13.28	Mata11,49,5m	1321410	1824790
Desmoceratidae	Damesites_damesi	87.55	48.65	-87.95	CASLoc.455A-Hornbrook	1368880	1368880
Desmoceratidae	Damesites_damesi	85.35	53.75	131.93	NaibuchiArea,Kitchinitesjaponicusammonitezone,Sakhalin	423.77	448.711
Desmoceratidae	Hauericeras_meridionale	85.35	33.72	8.38	AunorddeBrausc,Peillon,Alpes-Maritimes	21.6433	448.711
Desmoceratidae	Desmophyllites_diphylloides	77.75	51.81	-92.56	CASLoc.444-Hornbrook	25700000	25700000
Favositida	Manipora_amicarum	452.3	-7.77	-52.58	PortageChuteFormation,Member2(ChurchillRiverExposure)	1294.44	1294.44
Favositida	Manipora_feildeni	452.3	-7.77	-52.58	PortageChuteFormation,Member2(ChurchillRiverExposure)	1294.44	1294.44
Favositida	Agetolites_aseptatus	446.6	18.62	-5.57	OtvorotRiver,SetteDabanMountains,unit14	602.122	18627.2
Favositida	Manipora_amicarum	446.6	-7.01	-51	CautionCreekFormation,Member1(ChurchillRiverExposure)	18081.6	18627.2
Favositida	Favosites_discoideus	435.95	-25.15	-53.41	CoralsofBrassfieldFm,mid-Llandovery,7a-Patzkowsky	9774.93	21224300
Favositida	Favosites_favosiformis	435.95	25.64	20.63	WesternSayanRange,Aktashbiostrome	9385.98	21224300
Favositida	Favosites_favosus	435.95	-21.81	-34.42	AnticostiIsland,Rhuddanian,JupiterFm-Patzkowsky	20600000	21224300
Favositida	Favosites_gothlandicus	435.95	-10.59	14.92	AtrypaorbicularisCommunity,LateLlandoverian,C.Urals	17100000	21224300
Favositida	Favosites_hirsutus	435.95	23.23	-9.28	OtvorotRiver,SetteDabanMountains,unit22	686.793	21224300
Favositida	Favosites_hisingeri	435.95	-26.84	-54.82	CoralsofBrassfieldFm,mid-Llandovery,1-Patzkowsky	686458	21224300
Favositida	Gephuropora_infera	435.95	23.23	-9.28	OtvorotRiver,SetteDabanMountains,unit21	12901	21224300
Favositida	Multisolenia_tortuosa	435.95	-8.43	-46.63	KaskattamaNo.1Well,2116ft.level	2129600	21224300
Favositida	Paleofavosites_alveolaris	435.95	-20.99	-7.86	Norderon,LakeStorsjon,BergeFormation,Jamtland	3632680	21224300
Favositida	Paleofavosites_balticus	435.95	-10.59	14.92	AtrypaorbicularisCommunity,LateLlandoverian,C.Urals	63267.8	21224300
Favositida	Paleofavosites_forbesiformis	435.95	25.64	20.63	WesternSayanRange,Aktashbiostrome	9385.98	21224300
Favositida	Paleofavosites_prolificus	435.95	-8.43	-46.63	KaskattamaNo.1Well,2116ft.level	177843	21224300
Favositida	Paleofavosites_schmidti	435.95	34.35	68.45	SarePori,DevalakFormation	920601	21224300
Favositida	Favosites_favosideus	437.5	-23.81	-47.78	MaplewoodPark-Reynales	166.642	21224300
Favositida	Favosites_gothlandicus	429.45	-12.21	-52.1	SouthernManitoba,FisherBranchDolomite,NECornerW.Prin.mer.	48700000	53201200
Favositida	Favosites_hisingeri	429.45	-12.31	-52.56	SManitoba,CedarLakeDolomite,ChemahawinMem,EastofLundar	52117.4	53201200
Favositida	Favosites_niagarensis	429.45	-10	-51.36	SManitoba,CedarLakeDolomite,ChemahawinMem,Chemahawin,SaskatchewanRiver	689924	53201200
Favositida	Multisolenia_confluens	429.45	-12.21	-52.1	SouthernManitoba,FisherBranchDolomite,NECornerW.Prin.mer.	3385.6	53201200
Favositida	Multisolenia_tortuosa	429.45	-8.82	-51.82	SouthernManitoba,EastArmDolomite,CenterSec.33W.Prin.mer.,MooseLake	121217	53201200
Favositida	Paleofavosites_kirki	429.45	-12.54	-52.34	SouthernManitoba,FisherBranchDolomite,SouthofNarcisse	12398.3	53201200
Favositida	Paleofavosites_poulseni	429.45	-10	-51.36	SouthernManitoba,FisherBranchDolomite,SaskatchewanRiver	301.304	53201200
Favositida	Paleofavosites_transiens	429.45	-13.04	-52.62	SouthernManitoba,FisherBranchDolomite,SWCornerofSevenMilePoint	95191.4	53201200
Favositida	Coenites_rectilineatus	429.85	-26.33	-51.56	PipeCreekJr.Reef,PipeCreekJr.quarry,GrantCounty	9022.37	53201200
Favositida	Favosites_favosus	429.85	-28.17	-52.83	LouisvilleLimestone(FallsofOhioarea)	1298730	53201200
Favositida	Favosites_forbesi	429.85	-26.33	-51.56	PipeCreekJr.Reef,PipeCreekJr.quarry,GrantCounty	15800000	53201200
Favositida	Coenites_laminatus	432.6	8.57	-71.28	SandpileGroup,GSC35164	3048.59	53201200
Favositida	Favosites_gothlandicus	423.75	-19.08	-2.59	KlintebergBeds:FossilsofHoburgen-typereeflimestone(Manten1971,TableIX)	59300000	100593000
Favositida	Coenites_juniperinus	424.55	-10.51	-9.53	CateniporaCommunityatGaserumpen	408407	100593000
Favositida	Favosites_forbesi	424.55	-54.92	58.48	Loc.4.1,ListiceSect.,Beroun,Listicesect.760,Motol	71900000	100593000
Favositida	Favosites_hisingeri	424.55	-10.51	-9.53	Solitaryrugosecoral-SyringoporaComm.,SteinsfjordenFm.,HolmestrandDist.	17000000	100593000
Favositida	Cladopora_salairica	425.55	-36.73	126.97	ZhouquFormation(LowerPart:ShellyFauna)inZhouquCounty,GansuProvince	31200000	100593000
Favositida	Cladopora_seriata	425.55	-27.06	-44.37	Favosites-MassiveSTromatoporoidBiohermCommunityoftheGasportLimestone	33333.5	100593000
Favositida	Favosites_kennihoensis	425.55	0.73	-0.84	ActinodictyonjavorskiiCommunity,LwrKlenovaFm.,NovayaZemlya	5108880	100593000
Favositida	Favosites_moyeroensis	425.55	0.73	-0.84	ActinodictyonjavorskiiCommunity,LwrKlenovaFm.,NovayaZemlya	126656	100593000
Favositida	Favosites_niagarensis	425.55	-27.06	-44.37	Favosites-MassiveSTromatoporoidBiohermCommunityoftheGasportLimestone	4831.75	100593000
Favositida	Favosites_parasiticus	425.55	-26.99	-44.77	Striispirifer-AmphistrophiacommunityoftheHomocrinusbedsoftheRochesterSh	44.1573	100593000
Favositida	Favosites_pyriformis	425.55	-27.6	-43.28	Nucleospira-EnterolasmaCommunityoftheGlenmarkShaleatWallington/Sodustown	2709.67	100593000
Favositida	Favosites_spinigerus	425.55	-27.58	-51.5	Eohalysiocrinusstigmatus-SievertsiaAssoc.,VailStoneQuarry	2449.3	100593000
Favositida	Gephuropora_infera	425.55	25.55	-16.04	KhalyyaRiver,SetteDabanMountains,unit5	179.291	100593000
Favositida	Mesosolenia_festiva	425.55	30.7	14.58	WesternSayanRange,Karakhembioherm	77100	100593000
Favositida	Multisolenia_tortuosa	425.55	3.93	132.74	MiddleNingqiangFormationatDazhubanearNingqiangCounty,SShaanxiProvince	45900000	100593000
Favositida	Striatopora_flexuosa	425.55	-27.4	-43.6	Eoplectodonta-DicoelosiaSubcommunityoftheRochesterShaleatDensmoreCreek	472.637	100593000
Favositida	Planalveolites_fougti	427.2	-21.64	-2.85	HogklintBeds:FossilsofHoburgen-typereeflimestone(Manten1971,TableIX)	215.374	100593000
Favositida	Favosites_gothlandicus	419.45	6.49	80.17	BayinburukFormation,LowerLimestone,NalateMts.,west-centralXinjiangProv.	57700000	59913300
Favositida	Favosites_forbesi	420	-17.09	-2.24	Hoburgen2,Gotland,HamraBeds,stromatoporoid-calcimicrobialreef	2032010	59913300
Favositida	Favosites_ramiferus	420	1.4	12.74	BankovyiHorizon,Kolpakovo,Barabanovo,Kamensk-Ural'skii,MiddleUrals,Russia	30726.1	59913300
Favositida	Cladopora_salairica	420.8	39.31	38.98	ShovdolOboMountains,Baruun-Urt,EasternGobi,S?khbaatarFormation	2644870	59913300
Favositida	Favosites_allani	420.8	-1.11	175.1	PossibleBarrandina-Atrypoidea-SpirinellaComm.,CowombatFm.	555845	59913300
Favositida	Mesofavosites_obliquus	420.8	-4.75	71.22	LimestonesoftheKekexiongkudukeFormation,EasternBorderofDzhungarBasin	1099070	59913300
Favositida	Cladopora_actuosa	414.15	0.54	16.31	LowerSiyakBedsofSiyakRiverSection	803275	20889800
Favositida	Favosites_intricatus	414.15	0.54	16.31	LowerSiyakBedsofSiyakRiverSection	774357	20889800
Favositida	Favosites_socialis	414.15	3.86	9.93	Sarainayafacies,Sos'vaRiverValleySection	15100000	20889800
Favositida	Pachyfavosites_kozlowskii	414.15	-18.84	10.63	TajnaBedsatS-DboundarysectionsinDniestrValley	5743950	20889800
Favositida	Pleurodictyum_megastoma	414.15	-10.14	174.12	HeathcoteDistrict,Mt.IdaFormation,centralVictoria,Australia	27120.8	20889800
Favositida	Riphaeolites_virgosus	414.15	0.54	16.31	LowerSiyakBedsofSiyakRiverSection	725080	20889800
Favositida	Mesosolenia_reliqua	417.35	-18.58	7.3	CalymenednestrovianaCommunity,Zvenigorodsuite,Podolia	112.047	20889800
Favositida	Cladopora_rectilineata	410.7	6.31	127.81	SongHiem,MiaLeBeds	2803.46	53486800
Favositida	Emmonsia_yenlacensis	410.7	6.31	127.81	SongHiem,MiaLeBeds	2803.46	53486800
Favositida	Favosites_admirabilis	410.7	39.86	32.8	BatalKhuduk,MandalObo	2996610	53486800
Favositida	Favosites_fedotovi	410.7	3.71	10.81	VizhayRiver,NorthernUrals,VizhayHorizon	18800000	53486800
Favositida	Favosites_gregalis	410.7	-3.39	74.46	KarakavakFm,KaukRiver,AlaiRidge,Kyrgystan	947321	53486800
Favositida	Favosites_interstinctus	410.7	-7.45	73.15	Zinzil'banGorgePragian/Emsianboundarystratotype,Pragianpart	8610750	53486800
Favositida	Favosites_intricatus	410.7	0.41	18.56	ByelayaRiver,SouthernUrals	31900000	53486800
Favositida	Favosites_moonbiensis	410.7	-14.01	175.83	Loc.50.MitchellRiverNationalPark	1.80366	53486800
Favositida	Favosites_preplacentus	410.7	0.41	18.56	ByelayaRiver,SouthernUrals	2398160	53486800
Favositida	Favosites_stellaris	410.7	-4.9	73.47	ManakStage,Unit29,IsfaraRiverS-DSection	1115300	53486800
Favositida	Favosites_styriacus	410.7	-46.72	53.85	Seewarte-Kellerwand,CarnicAlps	629867	53486800
Favositida	Favosites_subnitellus	410.7	6.31	127.81	SongHiem,MiaLeBeds	2454.39	53486800
Favositida	Pleurodictyum_megastoma	410.7	-12.06	172.65	MountIdaFormation,MoormboolWestDistrict,Victoria,Australia	25635.5	53486800
Favositida	Riphaeolites_virgosus	410.7	-4.9	73.47	ManakStage,Unit29,IsfaraRiverS-DSection	5985270	53486800
Favositida	Squameofavosites_baolacensis	410.7	6.03	129.17	TongVaiSection,KaoLocFormation	4051.15	53486800
Favositida	Squameofavosites_frequens	410.7	3.14	-0.39	ValnevHorizon(lowerpart),platformfacies,SWNovayaZemlya	21555.3	53486800
Favositida	Squameofavosites_vanchieni	410.7	6.03	129.17	TongVaiSection,KaoLocFormation	4144.2	53486800
Favositida	Thamnopora_yavorskyi	410.7	-50.18	37.12	LebanzaQuarry	81.1284	53486800
Favositida	Thamnopora_plumosa	403.95	-44.75	52.4	Seewarte,CarnicAlps,WolayerSee	827328	827328
Favositida	Emmonsia_yenlacensis	398.6	6.46	131.04	NamPia,LowerBanPapBeds	0.570453	12525400
Favositida	Favosites_goldfussi	398.6	6.46	131.04	NamPia,LowerBanPapBeds	10300000	12525400
Favositida	Favosites_regularissimus	398.6	6.46	131.04	NamPia,LowerBanPapBeds	0.570453	12525400
Favositida	Favosites_stellaris	398.6	6.46	131.04	NamPia,LowerBanPapBeds	729787	12525400
Favositida	Parastriatopora_champungensis	398.6	6.46	131.04	NamPia,LowerBanPapBeds	0.570453	12525400
Favositida	Pleurodictyum_americanum	398.6	-51.67	-48.12	FlorestaSeriesFauna	63793.8	12525400
Favositida	Squameofavosites_kulkovi	398.6	6.46	131.04	NamPia,LowerBanPapBeds	962477	12525400
Favositida	Thamnopora_irregularis	398.6	-42.03	31.85	Beberino,SantaLuciaFormation,Castilla-Leon	469.281	12525400
Favositida	Caliapora_elegans	400.5	37.94	34.19	Tsakhirin-Khuduk,GobiAltay-Layer3	1459740	12525400
Favositida	Coenites_dunginensis	400.5	37.94	34.19	Tsakhirin-Khuduk,GobiAltay-Layer3	221.804	12525400
Favositida	Favosites_duni	400.5	-7.1	166.64	DouglasCreekFormation,ClermontDistrict,Queensland,Australia	2347.86	12525400
Favositida	Oculipora_angulata	400.5	37.94	34.19	Tsakhirin-Khuduk,GobiAltay-Layer3	55081.7	12525400
Favositida	Pachypora_tortuosa	400.5	37.94	34.19	Tsakhirin-Khuduk,GobiAltay-Layer2	2243.51	12525400
Favositida	Pleurodictyum_bokkeveldense	400.5	-59.5	-151.95	GydoFormation(1stShale),PrinceAlbertarea	9599.32	12525400
Favositida	Squameofavosites_bryani	400.5	-13.17	174.17	Benny'sTopsarea	618629	12525400
Favositida	Squameofavosites_dubatolovi	400.5	37.94	34.19	Tsakhirin-Khuduk,GobiAltay-Layer2	55081.7	12525400
Favositida	Thamnopora_compacta	400.5	37.94	34.19	Tsakhirin-Khuduk,GobiAltay-Layer5	221.804	12525400
Favositida	Favosites_goldfussi	395.3	3.22	2.82	CabaninHorizon,platformfacies,SWNovayaZemlya	2126980	2126980
Favositida	Thamnopora_irregularis	397.2	-41.14	30.79	AltodelaFarrapona,LaVidGroup,ColadillaFormation,Asturias	1475.11	2126980
Favositida	Alveolites_levis	390	36.96	40.06	BatalKhuduk,MandalObo	28311.7	2677440
Favositida	Crassialveolites_crassus	390	-24.54	7.95	Tabulates,S?tenichSyncline,JunkerbergFm.,Germany	1361700	2677440
Favositida	Emmonsia_emmonsi	390	-37.02	-27.73	2.5miNofFormosa,highwayroadcut	281608	2677440
Favositida	Favosites_basalticus	390	-38.95	-23.5	CentralArea,ZoneB(Amphigeniazone),OnondagaLimestone,NY	2349.97	2677440
Favositida	Favosites_canadensis	390	-38.95	-23.5	CentralArea,ZoneC(Biostrome),OnondagaLimestone,NY	591.908	2677440
Favositida	Favosites_emmonsi	390	-38.95	-23.5	CentralArea,ZoneB(Amphigeniazone),OnondagaLimestone,NY	1620.44	2677440
Favositida	Favosites_epidermatus	390	-38.95	-23.5	CentralArea,ZoneC(Biostrome),OnondagaLimestone,NY	2349.97	2677440
Favositida	Favosites_turbinatus	390	-38.95	-23.5	CentralArea,ZoneB(Amphigeniazone),OnondagaLimestone,NY	1620.44	2677440
Favositida	Pachyfavosites_abnormis	390	36.96	40.06	BatalKhuduk,MandalObo	192795	2677440
Favositida	Pachyfavosites_polymorphus	390	-23.46	8.02	Br?ke,Sauerland,Germany	1199070	2677440
Favositida	Placocoenites_medius	390	36.96	40.06	BatalKhuduk,MandalObo	145414	2677440
Favositida	Squameoalveolites_robustus	390	-36.05	43.79	Plabutsch,Grazarea	19558.5	2677440
Favositida	Alveolites_suborbicularis	385.25	-22.22	7.12	Oetelshofen,Dornap,Germany	8598930	68154000
Favositida	Favosites_goldfussi	385.25	-22.22	7.12	Oetelshofen,Dornap,Germany	2634280	68154000
Favositida	Thamnopora_cervicornis	385.25	-22.22	7.12	Oetelshofen,Dornap,Germany	9089420	68154000
Favositida	Alveolitella_fecunda	385.9	-22.99	7.27	Tabulates,S?tenichSyncline,LooghFm.,Germany	5042870	68154000
Favositida	Alveolitella_polenowi	385.9	2.17	117.62	HaLang,HaLangBeds	1897300	68154000
Favositida	Alveolites_admirabilis	385.9	2.17	117.62	HaLang,HaLangBeds	48505	68154000
Favositida	Alveolites_maillieuxi	385.9	-25.8	36.53	CelechovicenaHane,Horizon9(Moravia)	559427	68154000
Favositida	Alveolites_obtortus	385.9	-23.57	37.71	Poslovice,unitB	6826.59	68154000
Favositida	Alveolites_parvus	385.9	-23.02	36.74	SowieGorkiQuarry,unitB	5151.56	68154000
Favositida	Caliapora_battersbyi	385.9	-3.61	115.14	JukoupureefinXinshao,Hunan	4550750	68154000
Favositida	Cladopora_gracilis	385.9	8.96	122.41	PhaChanDai,Loeiarea	135569	68154000
Favositida	Crassialveolites_cavernosus	385.9	-22.96	36.87	Poslovice,unitA	449227	68154000
Favositida	Crassialveolites_crassiformis	385.9	-3.61	115.14	JukoupureefinXinshao,Hunan	179120	68154000
Favositida	Crassialveolites_crassus	385.9	-22.99	7.27	TabulatesandGlossophyllum,S?tenichSyncline,K?rtenFm.,Germany	38400000	68154000
Favositida	Crassialveolites_evidens	385.9	-23.02	36.74	SowieGorkiQuarry,unitB	689.231	68154000
Favositida	Crassialveolites_multiperforatus	385.9	-22.96	36.87	Poslovice,unitA	695.181	68154000
Favositida	Favosites_hamiltoniae	385.9	-36.88	-23.91	Locality8,Limestonea,MottvilleMember,OnondagaCo.,NY	37128.3	68154000
Favositida	Favosites_turbinatus	385.9	-36.41	-30.96	SilicaFormationUnit1	86281.6	68154000
Favositida	Natalophyllum_giveticum	385.9	-23.02	36.74	Olowianka,unitB	943.822	68154000
Favositida	Pachyfavosites_polymorphus	385.9	-23.2	7.36	Keldenich,EifelHills,Germany	30400000	68154000
Favositida	Pleurodictyum_cornu	385.9	-36.41	-30.96	SilicaFormationUnit7(7A,7B,7C)	195.503	68154000
Favositida	Pleurodictyum_styloporum	385.9	-39.28	-25.3	Unit9,MontebelloMember,MahantangoFm.,Rockville,PerryCo.,PA	63.3824	68154000
Favositida	Scoliopora_denticulata	385.9	-22.11	7.44	BrookintheL?ger,Sauerland,Germany	8485790	68154000
Favositida	Striatopora_enigmatica	385.9	-23.02	36.74	SowieGorkiQuarry,unitB	822.184	68154000
Favositida	Striatopora_linneana	385.9	33.67	65.04	HeitaiFm.Tabulates,MishanDistrict,HeilongjiangProvince	3659.98	68154000
Favositida	Thamnopora_boloniensis	385.9	-25.76	0.56	InfracombeSlates:CombeMartinSlates(JennyStartLimestone)SiteC	24800000	68154000
Favositida	Thamnopora_irregularis	385.9	-23.22	7.35	S?tenich,EifelHills,Germany	29700000	68154000
Favositida	Thamnopora_limitaris	385.9	-8.56	-36.62	HornPlateauReef,N.W.T.,Canada	1296450	68154000
Favositida	Thamnopora_micropora	385.9	-21.69	7.88	Moosspringtal,Brilon	580379	68154000
Favositida	Thamnopora_nicholsoni	385.9	-22.99	7.27	Tabulates,S?tenichSyncline,LooghFm.,Germany	7714940	68154000
Favositida	Thamnopora_polyforata	385.9	-20.99	-36.45	Locality2,1.6milesupfrommouthofRedDeerRiver,onnorthbank.	38400000	68154000
Favositida	Thamnopora_polygonalis	385.9	8.97	122.44	BanChomNoiQuarry,Loeiarea	156575	68154000
Favositida	Thamnopora_reticulata	385.9	-22.66	37.13	SkalskaSeries,Skaly,Polandcorals	18241.6	68154000
Favositida	Thamnopora_tumefacta	385.9	-22.11	7.44	BrookintheL?ger,Sauerland,Germany	419970	68154000
Favositida	Thamnoptychia_dubatolovi	385.9	3.9	120.37	KinhMon,LoSonBeds	10856.3	68154000
Favositida	Thamnoptychia_minuitissima	385.9	-36.41	-30.96	SilicaFormationUnit7(7A,7B,7C)	854.766	68154000
Favositida	Thamnoptychia_silicensis	385.9	-36.41	-30.96	SilicaFormationUnit7(7A,7B,7C)	104.068	68154000
Favositida	Favosites_hemisphericus	387.8	-20.56	-80.65	HotspurIsland	2747.05	68154000
Favositida	Alveolites_complanatus	379.9	-18.29	30.58	JazwicaQuarry(LgawaHill),unitsH-K	79185.1	44152700
Favositida	Alveolites_maillieuxi	379.9	-18.24	30.63	Sitkowka-KowalaQuarry,unitC	5232.95	44152700
Favositida	Alveolites_obtortus	379.9	-18.3	30.5	SowieGorkiQuarry,unitG	4238.4	44152700
Favositida	Alveolites_suborbicularis	379.9	-18.74	125.74	CanningBasinReef,Frasnian,Australia	43200000	44152700
Favositida	Crassialveolites_evidens	379.9	-18.35	30.61	GoraZamkova,unitG	75116.8	44152700
Favositida	Scoliopora_denticulata	379.9	-20.93	29.42	MokraM3	1338590	44152700
Favositida	Thamnopora_angusta	379.9	-18.74	125.74	CanningBasinReef,Frasnian,Australia	1445030	44152700
Favositida	Thamnopora_boloniensis	379.9	-19.03	126.4	SadlerLimestoneCorals,Loc.G1004,CanningBasin	36600000	44152700
Favositida	Thamnopora_cervicornis	379.9	-18.24	30.63	Sitkowka-KowalaQuarry,unitC	457139	44152700
Favositida	Alveolites_tenuissimus	377.8	-18.83	31.29	JazwicaQuarry(LgawaHill),unitsP-R,HolyCrossMountains	7473.7	7473.7
Favositida	Protomichelinia_favositoides	270.25	-19.19	43.61	GeliKhana,Ora,MicheliniaBeds	2546.8	2546.8
Favositida	Protomichelinia_microstoma	265.75	-5.23	96.28	Yaoshang,LowerPermian,PanxianCounty	426428	426624
Favositida	Protomichelinia_favositoides	266.5	-10.31	47.36	RutehII,(63)IA-2772,ElburzMountains	2049.42	426624
Favositida	Michelinia_medifixa	256.5	-2.32	39.75	Chanakhchi,DzhulfianStage	1123.73	1131.48
Favositida	Protomichelinia_allata	256.5	-3.19	39.99	Kuh-eAliBashi,Pseudogastrioceras-PermophricodothyrisZone	55.5458	1131.48
Favositida	Michelinia_nana	253.15	-0.81	38.79	Dzhegazur,AliBashiFm	24.1374	614.872
Favositida	Michelinia_parva	253.15	-1.32	39.32	DorashamII-3,Bed9	510.895	614.872
Favositida	Michelinia_vaga	253.15	-0.91	38.83	Akhura	522.31	614.872
Fenestrida	Fenestella_sinopermiana	253.15	17.28	101.87	Huangzhishansection,Bed24(new),Huzhoucity	1820520	8041930
Fenestrida	Polypora_ornata	253.15	-41.26	56.53	Khura,middleregionofUpperProductus-limestone,SaltRange	9920.09	8041930
Fenestrida	Polypora_sinokoninckiana	253.15	5.62	95.64	JiaozishanSectionBed25(AJ-43),AnshunCounty	154095	8041930
Fenestrida	Synocladia_dubia	255.65	15.4	23.32	AltenburgnearP?ssneck	2689360	8041930
Fenestrida	Acanthocladia_anceps	256.5	17.45	14.62	HumbletonHill,Durham(Howsecoll)	5971200	8041930
Fenestrida	Minilya_perelegans	256.5	-43.07	55.92	Khura,upperregionofMiddleProductus-limestone,SaltRange	1041.48	8041930
Fenestrida	Polypora_gigantea	256.5	-42.93	55.67	Vurcha,middlezoneofMiddleProductus-limestone,SaltRange	5.31191	8041930
Fenestrida	Polypora_koninckiana	256.5	-42.76	55.68	Chidru,CephalopodBed,SaltRange	175.306	8041930
Fenestrida	Polypora_megastoma	256.5	-43.17	55.81	Morah,MiddleProductus-limestone,SaltRange	2087.93	8041930
Fenestrida	Polypora_sykesi	256.5	-43.19	56.08	Katta,massivelimestones,MiddleProductus-limestone,SaltRange	543.566	8041930
Fenestrida	Acanthocladia_guadalupensis	262	4.09	-33.42	USGS2906green,ButterfieldTrail,GuadalupeMountains	261.361	20670900
Fenestrida	Fabifenestella_vediensis	262	-22.75	47.98	LaKaftari,Esfahan	18768.5	20670900
Fenestrida	Fenestella_sinopermiana	262	35.78	113.3	BolshieChurkiRange,Quarryat94kmalongBirobidzhan-LeninskoyRoute	38805.6	20670900
Fenestrida	Hinganotrypa_conspecta	262	30.38	110.91	BolshoyMongugayStream,Primorye	410.853	20670900
Fenestrida	Mackinneyella_hinganensis	262	31.97	111.06	ShirokayaFalls,BarabashevkaRiverTributary	45608	20670900
Fenestrida	Mackinneyella_robustiformis	262	31.46	112.76	UgodinzaRiverBasin,YakovlevRegion	15600000	20670900
Fenestrida	Mackinneyella_dzhulfensis	262	-22.75	47.98	LaKaftari,Esfahan	24929.7	20670900
Fenestrida	Mackinneyella_praepluriformis	262	-22.75	47.98	LaKaftari,Esfahan	46072.4	20670900
Fenestrida	Minilya_girtyi	262	4.08	-33.39	USGS2966green,ElCapitan,GuadalupeMountains	140.913	20670900
Fenestrida	Minilya_paratuberculifera	262	30.49	111.69	GolubinayaMountainQuarry,MaykheRiverValley,Primorye	50775	20670900
Fenestrida	Minilya_perelegans	262	-7.44	46.41	EmamiII,(62)IA-384,ElburzMountains	57113.1	20670900
Fenestrida	Permofenestella_labuensis	262	56.91	79.62	UldzaRiver,Ulz-GolBasin	1565190	20670900
Fenestrida	Polypora_koninckiana	262	-25.23	94.5	KhlongKhonKaen,LocalityN(860810-01)	2631450	20670900
Fenestrida	Polypora_sinokoninckiana	262	-22.75	47.98	LaKaftari,Esfahan	526817	20670900
Fenestrida	Polypora_soyanensis	262	-22.75	47.98	LaKaftari,Esfahan	634854	20670900
Fenestrida	Polypora_tubulosa	262	-25.29	50.32	Abadeh,CollectionC-0,HambastMountains	937387	20670900
Fenestrida	Rectifenestella_microretiformis	262	30.41	110.88	BarabashVillage,MiddleChandalaz,Primorye	8840100	20670900
Fenestrida	Rectifenestella_superretiformis	262	31.97	111.06	ShirokayaRiverQuarry,Primorye	6349.07	20670900
Fenestrida	Rectifenestella_araxensis	262	-22.75	47.98	LaKaftari,Esfahan	46072.4	20670900
Fenestrida	Septopora_flabellata	262	-22.75	47.98	LaKaftari,Esfahan	46072.4	20670900
Fenestrida	Septopora_lineata	262	-25.29	50.32	Abadeh,CollectionC-0,HambastMountains	32177.3	20670900
Fenestrida	Septopora_orientalis	262	35.78	113.3	BolshieChurkiRange,Quarryat94kmalongBirobidzhan-LeninskoyRoute	53553.4	20670900
Fenestrida	Septopora_quasiorientalis	262	-6.29	40.98	JulfaSection,Bed27,Kuh-eAliBashi	5039.49	20670900
Fenestrida	Fenestella_subconstans	265.75	4.4	99.95	Yangshanli,WuningCounty	3897790	20670900
Fenestrida	Hinganotrypa_sichuanensis	265.75	3.97	99.92	Fengbin,WuningCounty	26753.9	20670900
Fenestrida	Spinofenestella_popovi	266.5	75.44	-2.39	KhivachRiver,GizhigaBasin,OmolonHorizon,OmolonMassif	412346	20670900
Fenestrida	Wjatkella_curta	266.5	65.43	-17.01	GlukosRiver,Omolonbasin	500.711	20670900
Fenestrida	Acanthocladia_guadalupensis	270.25	1.35	-33.45	USNM736x,DugoutMountain,GlassMountains	7005.09	3305010
Fenestrida	Alternifenestella_horologia	270.25	-50.99	117.81	BMR627/1,TableHill,PortKeatsDistrict	8102.52	3305010
Fenestrida	Cavernella_nitidaeformis	270.25	37.16	41.6	PilesWell,KomiRegion	392448	3305010
Fenestrida	Fenestella_dispersa	270.25	-67.55	161.19	AbbeyGreen,WittinghamParish	3224.93	3305010
Fenestrida	Fenestella_fossula	270.25	-67.41	162.01	GlendonHomestead,HunterRiver(USNMcoll)	186.67	3305010
Fenestrida	Fenestella_markini	270.25	33.89	32.28	KuloyRiver,ArkhangelRegion	18301.8	3305010
Fenestrida	Mackinneyella_robustiformis	270.25	1.37	-33.16	USNM735w,OldWordRanch,GlassMountains	590.586	3305010
Fenestrida	Mackinneyella_granulosa	270.25	-77.55	164.44	T2,TunbridgeTierDDHWell,250.5mdepth	17834.8	3305010
Fenestrida	Minilya_shurae	270.25	27.39	42.65	Pechishchiravinemouth,Kazan,Tatarstan	42764.1	3305010
Fenestrida	Parafenestralia_arborescens	270.25	28.85	41.52	Atary,VyatkaRiver,KirovRegion	58767.3	3305010
Fenestrida	Parafenestralia_longa	270.25	28.85	41.52	Atary,VyatkaRiver,KirovRegion	501836	3305010
Fenestrida	Parapolypora_novella	270.25	28.54	41.45	DenesyatoVillage,GremetskaCreek,KirovRegion	18407.1	3305010
Fenestrida	Parapolypora_sparsa	270.25	28.85	41.52	Atary,VyatkaRiver,KirovRegion	80638.5	3305010
Fenestrida	Permofenestella_labuensis	270.25	39.37	100.07	Dal'niyDaur,Transbaikal	1201770	3305010
Fenestrida	Polypora_soyanensis	270.25	1.35	-33.45	USNM732j,SierradelNorte,GlassMountains	711992	3305010
Fenestrida	Polypora_ellipticopora	270.25	28.85	41.52	Atary,VyatkaRiver,KirovRegion	5242.11	3305010
Fenestrida	Polypora_hirsuta	270.25	1.37	-33.16	USNM735w,OldWordRanch,GlassMountains	189.035	3305010
Fenestrida	Polypora_keyserlingi	270.25	28.85	41.52	Atary,VyatkaRiver,KirovRegion	82818.8	3305010
Fenestrida	Polypora_magnicava	270.25	32.54	33.98	PinegaRiver,ArchangelRegion	8821.87	3305010
Fenestrida	Polypora_virga	270.25	-78.69	170.22	H38,OspreyHead,EaglehawkNeck	66398	3305010
Fenestrida	Polyporella_internata	270.25	-67.41	162.01	GlendonHomestead,HunterRiver(USNMcoll)	315.474	3305010
Fenestrida	Polyporella_perturbata	270.25	1.37	-33.25	USNM734l,HessCanyon,GlassMountains	168.155	3305010
Fenestrida	Polyporella_rebarbensis	270.25	-78.15	165.5	H31,MountNassau,Rathbone'sQuarry	5233.74	3305010
Fenestrida	Protoretepora_ampla	270.25	-67.41	162.01	GlendonHomestead,HunterRiver(USNMcoll)	23581	3305010
Fenestrida	Rectifenestella_microretiformis	270.25	28.85	41.52	Atary,VyatkaRiver,KirovRegion	458358	3305010
Fenestrida	Rectifenestella_permulta	270.25	27.98	44.87	ChuvashskiiBajtuganFarm,SokRiver,SamaraOblast	601891	3305010
Fenestrida	Rectifenestella_pseudoretiformis	270.25	28.85	41.52	Atary,VyatkaRiver,KirovRegion	509057	3305010
Fenestrida	Rectifenestella_retiformis	270.25	40.52	31.52	PervayaSavinaRiver,Collection15049-1,NovayaZemlya	437397	3305010
Fenestrida	Reteporidra_atarensis	270.25	28.85	41.52	Atary,VyatkaRiver,KirovRegion	18011.6	3305010
Fenestrida	Reteporidra_hexagona	270.25	28.62	41.43	NemdaRiver,BetweenKameniandTyapchichiVillages	28363.7	3305010
Fenestrida	Reteporidra_quasimicropora	270.25	28.81	41.6	BikovoVillage,VyatkaRiver	14259.4	3305010
Fenestrida	Reteporidra_soloduchoi	270.25	28.79	41.51	NemdaRiver,Gremechkacreek,ravinebetweenMininoandPikhtyataVillages	66.3721	3305010
Fenestrida	Septopora_orientalis	270.25	1.37	-33.34	USNM707e,SullivanPeak,GlassMountains	1012.12	3305010
Fenestrida	Shulgapora_magnafenestrata	270.25	-60.89	153.89	UQL2580,FossilRidge,Cracow	72975.9	3305010
Fenestrida	Thamniscus_indubius	270.25	27.31	45.43	KamyshlaVillage,SokRiver,SamaraRegion	70072.6	3305010
Fenestrida	Triznella_permiana	270.25	28.54	41.45	DenesyatoVillage,GremetskaCreek,KirovRegion	60847.9	3305010
Fenestrida	Triznella_viatkensis	270.25	27.31	45.43	KamyshlaVillage,SokRiver,SamaraRegion	66817.3	3305010
Fenestrida	Wjatkella_grandis	270.25	28.84	41.4	Petropavlovskoye,VyatkaRiver,KirovRegion	4445.3	3305010
Fenestrida	Wjatkella_nekhoroshevi	270.25	31.64	110.55	NesterovkaRiver,VladivostokHorizon,Primorye	156.098	3305010
Fenestrida	Wjatkella_permiana	270.25	33.56	33.12	MezenskayaPizhmaRiver,ArkhangelRegion	505127	3305010
Fenestrida	Wjatkella_wjatkensis	270.25	28.85	41.52	Atary,VyatkaRiver,KirovRegion	604823	3305010
Fenestrida	Laxifenestella_exserta	275.6	-69.75	165.88	WardenHeadUlladulla	3991.6	3305010
Fenestrida	Polyporella_woodsi	275.6	-69.75	165.88	WardenHeadUlladulla	3722.93	3305010
Fenestrida	Hinganotrypa_sichuanensis	276	3.18	96.87	Baimushan,WuweiCounty	4656.86	3305010
Fenestrida	Levifenestella_altacarinata	276	-67.02	164.42	Branxtonwestrailwaycutting	1137.71	3305010
Fenestrida	Penniretepora_oppositus	276	11.53	-37.77	GeorgiaPacificGypsumMineRoad,Section1,Zone1,NorthMuddyMountains	161.416	3305010
Fenestrida	Polypora_montuosa	276	-67.05	164.27	BelfordParish,Portion15	82.9504	3305010
Fenestrida	Polypora_sargaensis	276	11.53	-37.77	GeorgiaPacificGypsumMineRoad,Section1,Zone3,NorthMuddyMountains	161.416	3305010
Fenestrida	Rectifenestella_sparsa	276	-69.81	165.87	DP2,DolphinPoint,Ulladulla	2.14263	3305010
Fenestrida	Septopora_bilateralis	276	11.53	-37.77	GeorgiaPacificGypsumMineRoad,Section1,Zone1,NorthMuddyMountains	161.416	3305010
Fenestrida	Alternifenestella_horologia	281.3	-54.61	111.19	Keevie'sWell,8miNofMountAndersonHomestead	11600000	56114200
Fenestrida	Polyporella_woodsi	281.3	-54.61	111.19	Keevie'sWell,8miNofMountAndersonHomestead	27181.9	56114200
Fenestrida	Protoretepora_ampla	281.3	-55.85	114.28	ChristmasCreekHomestead,scarp2milesE	214315	56114200
Fenestrida	Alternifenestella_subquadratopora	284.8	-4.89	26.28	Garnitzenbach,TrogkofelFormation,CarnicAlps	1309.56	56114200
Fenestrida	Fenestella_simulatrix	284.8	-56.65	158.39	LakesCreekQuarry,Trachyporahorizon,Rockhampton	86.6064	56114200
Fenestrida	Fenestella_fossula	284.8	-58.76	155.75	BMRSp720,AOEReidsDomeNo2Well	819.802	56114200
Fenestrida	Flexifenestella_eichwaldi	284.8	-31.41	65.39	Watershed1kmnorthwestofKarabelesPass	466360	56114200
Fenestrida	Flexifenestella_foraminosa	284.8	64.4	35.66	BituchanRiver,UyanaBasin,WesternVerkhoyan	137579	56114200
Fenestrida	Flexifenestella_reteporinaeformis	284.8	32.72	31.87	IndigaRiver,Artinskian,northernTiman	1498.59	56114200
Fenestrida	Mackinneyella_brevicellata	284.8	34.99	15.16	AkseloyaAKS-A-11.8m	3324410	56114200
Fenestrida	Neopolypora_reciderata	284.8	64.4	35.66	BituchanRiver,Verkhoyan	47821.2	56114200
Fenestrida	Paraseptopora_uralica	284.8	33.85	33.09	Nariyan-MarWellP-1,Artinskian,MalozemelskayaTundra	25257.4	56114200
Fenestrida	Polypora_confirmata	284.8	32.84	1.43	GreatBearCape(StoreBjornekap),EllesmereIsland	60587.2	56114200
Fenestrida	Polypora_consanguinea	284.8	0.47	-60.03	AzureLakeSection,MarblePeak,VancouverIsland	272392	56114200
Fenestrida	Polypora_martis	284.8	34.99	15.16	AkseloyaAKS-A-7.0m	247.354	56114200
Fenestrida	Polypora_pertinax	284.8	-58.27	155.02	BMRSP132,EmeraldRoad,Springsure	6916.01	56114200
Fenestrida	Polypora_virga	284.8	-73.86	172.43	B5c,WestArm,Beaconsfield	299235	56114200
Fenestrida	Polypora_voluminosa	284.8	32.84	1.43	GreatBearCape(StoreBjornekap),EllesmereIsland	293855	56114200
Fenestrida	Polyporella_borealis	284.8	34.99	15.16	AkseloyaAKS-A-5.0m	51524.9	56114200
Fenestrida	Polyporella_perfecta	284.8	32.72	31.87	IndigaRiver,NerminskayaGorizont,northernTiman	1482.59	56114200
Fenestrida	Rectifenestella_granulifera	284.8	-56.14	156.73	BMRDu179,StoodleighHomestead	2107.33	56114200
Fenestrida	Rectifenestella_retiformis	284.8	-35.41	110.49	KhaoTaMongRaishorelinesandstoneblocks,PrachuapKhiriKhan	118647	56114200
Fenestrida	Rectifenestella_expansa	284.8	-56.65	158.39	LakesCreekQuarry,Trachyporahorizon,Rockhampton	33825.3	56114200
Fenestrida	Rectifenestella_microporata	284.8	34.99	15.16	AkseloyaAKS-A-1.5m	3598940	56114200
Fenestrida	Spinofenestella_basleoensis	284.8	-35.43	110.52	KhaoChongKrachok,PrachuapKhiriKhan	48000000	56114200
Fenestrida	Synocladiella_georgii	284.8	34.89	36.52	IntaRiver,Outcrop71	21183	56114200
Fenestrida	Acanthocladia_guadalupensis	292.55	1.59	-26.19	GE01UMSh,GearyCounty	11972.4	6368150
Fenestrida	Alternifenestella_cervoidea	292.55	-31.96	-46.69	CuyaviSection,SampleCu115	2581.38	6368150
Fenestrida	Archimedes_stuckenbergi	292.55	29.97	29.46	BelayaRiver,Sakmarian,NorthernTimanMountains	437.49	6368150
Fenestrida	Flexifenestella_eichwaldi	292.55	-36.05	68.96	Kurteke1,BazardarinFm,Limestone	3704.85	6368150
Fenestrida	Flexifenestella_foraminosa	292.55	30.23	29.47	IndigaRiver,Sakmarian,NorthernTimanMountains	379.612	6368150
Fenestrida	Flexifenestella_reteporinaeformis	292.55	30.23	29.47	IndigaRiver,Sakmarian,NorthernTimanMountains	248.942	6368150
Fenestrida	Laxifenestella_lahuseni	292.55	-48.52	58.3	USB2218-21,Sang-Varizsection,Halvan	170527	6368150
Fenestrida	Mackinneyella_brevicellata	292.55	-36.05	68.96	Kurteke1,BazardarinFm,Limestone	1078.41	6368150
Fenestrida	Mackinneyella_supraornamentata	292.55	-36.05	68.96	Kurteke1,BazardarinFm,Limestone	60684.6	6368150
Fenestrida	Minilya_rhomboidea	292.55	-42.42	69.1	DoniYarchi	45304.5	6368150
Fenestrida	Minilya_binodata	292.55	1.68	-26.25	ML03LLLH,MarshallCounty	55692.2	6368150
Fenestrida	Penniretepora_auernigiana	292.55	1.15	-26.77	GE30LMSh,GearyCounty	6061.38	6368150
Fenestrida	Penniretepora_curvula	292.55	0.77	-26.67	MS05UUH,MorrisCounty	7063.39	6368150
Fenestrida	Penniretepora_flexistriata	292.55	0.76	-26.67	MS06UUH,MorrisCounty	7239.63	6368150
Fenestrida	Permofenestella_plana	292.55	29.97	29.46	BelayaRiver,Sakmarian,NorthernTimanMountains	5.66672	6368150
Fenestrida	Polypora_elliptica	292.55	1.59	-26.19	GE01UMSh,GearyCounty	56811.9	6368150
Fenestrida	Polypora_aestacella	292.55	1.59	-26.19	GE01UMSh,GearyCounty	4780.88	6368150
Fenestrida	Polypora_sulaensis	292.55	29.85	30.13	SulaRiver,Sakmarian,NorthernTimanMountains	91920.5	6368150
Fenestrida	Polyporella_lyndoni	292.55	-57.99	98.99	BMRML106,RoundHillWell,WinningStation	211601	6368150
Fenestrida	Polyporella_micropora	292.55	29.85	30.13	SulaRiver,Sakmarian,NorthernTimanMountains	132.039	6368150
Fenestrida	Polyporellina_subcrotilla	292.55	29.85	30.13	SulaRiver,Sakmarian,NorthernTimanMountains	101.284	6368150
Fenestrida	Rectifenestella_tenax	292.55	1.59	-26.19	GE01UMSh,GearyCounty	14747.4	6368150
Fenestrida	Rectifenestella_microporata	292.55	33.02	13.54	RejmyrefjelletREF-2-4.0m	35333.8	6368150
Fenestrida	Rectifenestella_nikiforovae	292.55	30.23	29.47	IndigaRiver,Sakmarian,NorthernTimanMountains	6368150	6368150
Fenestrida	Rectifenestella_ornata	292.55	29.85	30.13	SulaRiver,Sakmarian,NorthernTimanMountains	114.487	6368150
Fenestrida	Septopora_spinulosa	292.55	1.59	-26.19	GE01UMSh,GearyCounty	17454.3	6368150
Fenestrida	Spinofenestella_spinulosa	292.55	1.59	-26.19	GE01UMSh,GearyCounty	9912.63	6368150
Fenestrida	Alternifenestella_bifida	301.15	30.27	11.41	RejmyrefjelletREF-0-25.0m	168.602	168.602
Fenestrida	Fenestella_cincta	308.5	-49.05	159.12	UQL2140,Yarrol	127.66	140509
Fenestrida	Fenestella_micropora	308.5	-49.17	159.17	UQL2136,Yarrol	23242	140509
Fenestrida	Polypora_remota	310.775	3.78	-43.67	UCLAlocality4426,IndianSprings,Nevada	119533	140509
Fenestrida	Fenestella_osbornei	312.525	-53.11	164.82	OakyCreeksection,nearSherwood,11milesWNWofKempsey	458.106	140509
Fenestrida	Archimedes_communis	322.25	-11.35	-26.98	Locality16,GlenDeanLimestone,PerryCo.,IN	1261.05	81579.5
Fenestrida	Archimedes_distans	322.25	-11.25	-38.11	VillageofMilo	81054.8	81579.5
Fenestrida	Archimedes_invaginatus	322.25	-11.29	-26.92	Locality12,GlenDeanLimestone,CrawfordCo.,IN	3709.69	81579.5
Fenestrida	Archimedes_lativolvis	322.25	-11.35	-26.98	Locality16,GlenDeanLimestone,PerryCo.,IN	2100.1	81579.5
Fenestrida	Archimedes_macfarlani	322.25	-10.92	-26.84	Locality2,GlenDeanLimestone,OrangeCo.,IN	1902.1	81579.5
Fenestrida	Archimedes_meekanoides	322.25	-11.25	-38.11	VillageofMilo	56240.7	81579.5
Fenestrida	Archimedes_meekanus	322.25	-11.35	-26.98	Locality16,GlenDeanLimestone,PerryCo.,IN	198.051	81579.5
Fenestrida	Archimedes_proutanus	322.25	-11.41	-27.01	Locality19,GlenDeanLimestone,PerryCo.,IN	15.1393	81579.5
Fenestrida	Archimedes_swallovanus	322.25	-9.07	-29.33	Locality37,FraileysShale/HaneyLimestone,HardinCo.,IL	3701.45	81579.5
Fenestrida	Archimedes_terebriformis	322.25	-10.92	-26.84	Locality2,GlenDeanLimestone,OrangeCo.,IN	3566.3	81579.5
Fenestrida	Fenestella_cestriensis	322.25	-11.25	-38.11	VillageofMilo	6248.03	81579.5
Fenestrida	Fenestella_exigua	322.25	-11.25	-38.11	VillageofMilo	7927.16	81579.5
Fenestrida	Fenestella_malchii	322.25	-43.14	153.58	UQL2082,Yarrol	208.694	81579.5
Fenestrida	Fenestella_micropora	322.25	-43.97	154.07	UQL2059,Yarrol	358.306	81579.5
Fenestrida	Fenestella_osbornei	322.25	-43.77	153.94	UQL1943,Yarrol	43.8766	81579.5
Fenestrida	Polypora_neerkolensis	322.25	-43.14	153.58	UQL2082,Yarrol	339.912	81579.5
Fenestrida	Rectifenestella_tenax	322.25	-11.25	-38.11	VillageofMilo	7927.16	81579.5
Fenestrida	Rectifenestella_tenax	328.75	0.75	-43.43	BryozoafromthelowerGreatBluelimestone,Locality11032,TooeleCo.,UT	399731	399731
Fenestrida	Dissotrypa_sincera	385.9	-45.93	5.32	SabkhatLafyrinareefcomplex,TindoufBasin,Terguetarea	51934	51934
Fenestrida	Fenestella_reticulata	420	-16.54	-2.22	longwallonKaupungsklintHillock,Ardre	692.255	15324.8
Fenestrida	Fenestella_elegans	425.55	-26.99	-44.77	Howellella-Plecatrypa-FenestrateBryozoanCommunityoftheRochesterShaleatNi	14626.5	15324.8
Fenestrida	Polypora_incepta	425.55	-26.99	-44.77	Howellella-Plecatrypa-FenestrateBryozoanCommunityoftheRochesterShaleatNi	55.608	15324.8
Fenestrida	Fenestella_tenuis	432.1	-25.41	-46.04	FishCreek-Wolcott	4860.51	4860.51
Lophospiridae	Worthenia_superstes	186.3	28.61	25.37	BakonyMts.,Kericser(L?k?t),sectionVIBedNo.25	459.783	459.783
Lophospiridae	Worthenia_contabulata	213.55	21.3	21.1	RoadcutbetweenTapolcaandS?meg	1034.59	1068.54
Lophospiridae	Worthenia_escheri	213.55	21.28	21.46	S?dValley,M?rk?	32.206	1068.54
Lophospiridae	Worthenia_windowblindensis	249.25	8.45	-39.21	BeaverDamMountainsBM5,Bed12A	24683.8	24683.8
Lophospiridae	Worthenia_corrugata	262	16.29	-31.51	AMNHB72213,ElkRidge,SubletteCounty	15632.1	35288
Lophospiridae	Worthenia_pagoda	262	-14	103.32	PhnomAnseh,Battambang	2268.61	35288
Lophospiridae	Worthenia_schirjaevensis	262	-14.65	103.64	PhnomAngkor,Battambang	12702.7	35288
Lophospiridae	Manzanospira_manzanicum	266.5	3.6	-33.56	AMNH514,GuadalupeCanyon,GuadalupeMountains	3.43942	35288
Lophospiridae	Worthenia_alticarinata	270.25	1.36	-33.14	USNM703,OldWordRanch,GlassMountains	789.346	35288
Lophospiridae	Worthenia_corrugata	270.25	9.22	-36.57	BottomlessPits,Bed9,KaibabFormation,WalnutCanyon	4503.16	35288
Lophospiridae	Worthenia_kingi	270.25	1.37	-33.34	USNM707e,SullivanPeak,GlassMountains	19.8922	35288
Lophospiridae	Manzanospira_manzanicum	270.25	1.36	-33.14	USNM703,OldWordRanch,GlassMountains	2394.75	35288
Lophospiridae	Biarmeaspira_multilineata	270.25	1.36	-33.14	USNM703,OldWordRanch,GlassMountains	789.346	35288
Lophospiridae	Worthenia_tabulata	270.25	1.36	-33.14	USNM703,OldWordRanch,GlassMountains	24.8141	35288
Lophospiridae	Worthenia_arizonensis	275.6	4.85	-34.41	U.S.G.Scollection19780-PC,YesoFm.,NewMexico	49019.3	178357
Lophospiridae	Worthenia_alticarinata	276	3.22	-33.74	AMNH678,CutoffMountain,GuadalupeMountains	11639.3	178357
Lophospiridae	Worthenia_corrugata	276	14.32	-36.27	ButteMountains,Unit8	7970.44	178357
Lophospiridae	Worthenia_crenulata	276	1.06	-33.29	USNM703c,OldWordRanch,GlassMountains	27801.1	178357
Lophospiridae	Worthenia_kingi	276	1.06	-33.26	USNM702,SplitTank,GlassMountains	7040.11	178357
Lophospiridae	Worthenia_latialveozona	276	3.13	-33.76	AMNH369,ShirttailCanyon,GuadalupeMountains	11413.9	178357
Lophospiridae	Biarmeaspira_multilineata	276	1.06	-33.26	USNM702,SplitTank,GlassMountains	62517.2	178357
Lophospiridae	Worthenia_pilula	276	1.05	-33.53	USNM710d,LenoxHills,GlassMountains	353.912	178357
Lophospiridae	Worthenia_speciosa	276	1.04	-33.49	USNM707d,LenoxHills,GlassMountains	133803	178357
Lophospiridae	Worthenia_tabulata	276	1.06	-33.29	USNM703c,OldWordRanch,GlassMountains	35010.9	178357
Lophospiridae	Worthenia_kingi	292.55	-0.64	-36.92	USNM712g,PowwowCanyon,HuecoMountains	18583	235929
Lophospiridae	Worthenia_speciosa	292.55	0.24	-37.2	RobledoMountainsUNM-1465	94013	235929
Lophospiridae	Biarmeaspira_verideclinata	292.55	26.45	29.89	KholmVillage4919/2,PinegaRiver	1.10502	235929
Lophospiridae	Worthenia_tabulata	299.2	-4.46	-22.74	TypelocalitityofShumwayLimestoneMember,MatttoonFm.,ShumwayCyclothem	170729	235929
Lophospiridae	Yochelsonospira_tenuilineata	322.25	-12.38	-34.01	Loc.1.USGS14369.RoadcutonsesideUS65,0.8kmswofPeytonCreekBridge	96557.7	96557.7
Lophospiridae	Hanusispira_confinis	400.5	-34.51	46.69	St.ProkopQuarry,HlubocepyValley	1540740	1540740
Lophospiridae	Hanusispira_fugitiva	400.5	-34.51	46.69	St.ProkopQuarry,HlubocepyValley	5837.33	1540740
Lophospiridae	Loxoplocus_gothlandicus	420	-51.05	56.72	Bubovice	11000000	11005700
Lophospiridae	Ruedemannia_robusta	420	-23.49	-11.58	AnkerdineHill,Abberley,Malvern	235544	11005700
Lophospiridae	Loxoplocus_soluta	420.8	-27.72	-43.27	Eurypterid-associatedbiotaofthedolomiteoftheLockportFmn.atElora,Ont.	1624.57	11005700
Lophospiridae	Frodospira_imbricata	422.1	-18.68	-2.46	SandarveKulle,steephillock1kmnorthofFardhemChurch	436.114	11005700
Lophospiridae	Longstaffia_pulchra	432.1	-32.63	-15.16	MarshbrookFaultedOutlier,ShelveOutliers,Shropshire	137894	10361000
Lophospiridae	Loxoplocus_silurica	441.35	-40.59	-33.51	USNM10114.2050'northeastofMcGillivrayBrook,150'north-northwestofoverburdenline.Arisaig	290792	10361000
Lophospiridae	Arjamannia_cancellatula	441.35	-40.59	-33.51	USNM10114.2050'northeastofMcGillivrayBrook,150'north-northwestofoverburdenline.Arisaig	1247.2	10361000
Lophospiridae	Paupospira_bowdeni	446.6	-26.18	-59.68	WaynesvilleFormation,westernCincinnatiArch,Kentucky	181984	10361000
Lophospiridae	Ruedemannia_lirata	446.6	-25.15	-49.39	PulaskiShale,Dalmanella-Sowerbyellacommunity	1183860	10361000
Lophospiridae	Lophospira_milleri	446.6	-19.5	-55.43	Michigan,RichmondFmStoningtonBeds,OgontzMember,Stratton'sFarmDitch	947.657	10361000
Lophospiridae	Paupospira_moorei	446.6	-22.71	-38.95	GSC99917.Smallexposures1.5mileseastofJunctionCliff,Zone4	134.691	10361000
Lophospiridae	Lophospira_perangulata	446.6	-25.04	-58.01	Richmond,WhitewaterFm.,WayneCo.,Indiana	2055100	10361000
Lophospiridae	Paupospira_tropidophora	446.6	-25.04	-58.01	Richmond,WhitewaterFm.,WayneCo.,Indiana	7473840	10361000
Lophospiridae	Loxoplocus_vermetus	447.55	-30.17	-9.53	TrosvikenvedBrevik	82717.9	10361000
Lophospiridae	Paupospira_bowdeni	455.2	-26.91	-62.03	Arnheim-typeCincinnatian	48903.9	34453700
Lophospiridae	Paupospira_burginensis	455.2	-28.09	-66.37	Lebanon	805687	34453700
Lophospiridae	Eunema_centralis	455.2	-28.09	-66.37	Murfreesboro	761468	34453700
Lophospiridae	Eunema_concinnula	455.2	-16.76	-62.32	DecorahShaleGastropodaandMonoplacophora,Minnesota	259605	34453700
Lophospiridae	Paupospira_elevata	455.2	-16.76	-62.32	ProsserLimestoneGastropodaandMonoplacophora,Minnesota	225916	34453700
Lophospiridae	Eunema_helicteres	455.2	-16.76	-62.32	PlattevilleFormationGastropodaandMonoplacophora,Minnesota	629370	34453700
Lophospiridae	Ruedemannia_lirata	455.2	-26.77	-62.42	Cincinnatiarea,KopeFm.,KentonCo.,KY	252010	34453700
Lophospiridae	Lophospira_milleri	455.2	-26.91	-62.03	Arnheim-typeCincinnatian	931245	34453700
Lophospiridae	Lophospira_obliqua	455.2	-28.09	-66.37	UpperCarters-Wilson,1949	67042.1	34453700
Lophospiridae	Paupospira_oweni	455.2	-28.09	-66.37	Bigby-Cannon(Bigby)-Wilson,1949	6864720	34453700
Lophospiridae	Lophospira_perangulata	455.2	-26.91	-62.03	Arnheim-typeCincinnatian	2504930	34453700
Lophospiridae	Ectomaria_prisca	455.2	-28.09	-66.37	Murfreesboro	1227360	34453700
Lophospiridae	Gyronema_pulchellum	455.2	-16.76	-62.32	St.PeterSandstoneGastropodaandMonoplacophora,Minnesota	71711.3	34453700
Lophospiridae	Gyronema_semicarinatum	455.2	-16.76	-62.32	St.PeterSandstoneGastropodaandMonoplacophora,Minnesota	310257	34453700
Lophospiridae	Lophospira_serrulata	455.2	-16.76	-62.32	PlattevilleFormationGastropodaandMonoplacophora,Minnesota	842289	34453700
Lophospiridae	Lophospira_spironema	455.2	-16.76	-62.32	CummingsvilleFormationGastropodaandMonoplacophora,Minnesota	2837.04	34453700
Lophospiridae	Paupospira_sumnerensis	455.2	-28.09	-66.37	Bigby-Cannon(WardMember)-Wilson,1949	149511	34453700
Lophospiridae	Paupospira_tropidophora	455.2	-26.91	-62.03	Arnheim-typeCincinnatian	1715.39	34453700
Lophospiridae	Lophospira_ventricosa	455.2	-16.76	-62.32	PlattevilleFormationGastropodaandMonoplacophora,Minnesota	609375	34453700
Lophospiridae	Lophospira_milleri	461.75	-26.11	-45.56	ClearwaterPoint,MinganIslands	214643	34453700
Lophospiridae	Lophospira_perangulata	461.75	-26.11	-45.56	ClearwaterPoint,MinganIslands	26100000	34453700
Lophospiridae	Lophospira_rectistriata	461.75	-28.13	-54.93	A20.SouthendofValcourIsland,LakeChamplain	689882	34453700
Lophospiridae	Donaldiella_cicelia	473.35	-25.23	-76.38	MF-1,lowerbeds,1.2kmeast,1kmsouthofMarbleHill	54472.3	61958.5
Lophospiridae	Lophospira_perangulata	473.35	-25.24	-76.32	MF-17,6kmeastand2.6kmnorthofMarbleHill	44418.7	61958.5
Orthotetida	Orthothetina_eusarkos	252.65	-42.2	60.02	GuryulRavineKhunamuhFormation,E1,Beds50,51	14200000	44919500
Orthotetida	Derbyia_acutangula	253.15	8.33	93.94	BeifengjingSection,Bed8,ZhongliangHill	917238	44919500
Orthotetida	Geyerella_alpina	253.15	-6.64	57.02	Kutali2,UpperTakhtabulakFm	281.295	44919500
Orthotetida	Derbyia_altestriata	253.15	32.16	111.31	KP14,KuwanoePass,Monobe,Ayabe-cho,KyotoPrefecture	435768	44919500
Orthotetida	Meekella_arakeljani	253.15	8.33	93.94	BeifengjingSection,Bed26,ZhongliangHill	2577600	44919500
Orthotetida	Schuchertella_asperulus	253.15	-41.04	56.26	Eastofpt2263,ESEofChhidru,Bellerophonbed,SaltRange	1708.63	44919500
Orthotetida	Meekella_beipeiensis	253.15	8.18	94.61	NantongSection,Bed22	476.888	44919500
Orthotetida	Orthotetes_bisulcatus	253.15	-50.28	61.85	W1213,LuriMb,KarnaliUnspecified	7301.39	44919500
Orthotetida	Perigeyerella_costellata	253.15	8.33	93.94	BeifengjingSection,Bed26,ZhongliangHill	3584630	44919500
Orthotetida	Kiangsiella_distorta	253.15	-40.69	55.55	Bilot,uppermostProductusLimestone,KhisorRange	1828.6	44919500
Orthotetida	Orthothetina_ellipsoides	253.15	8.33	93.94	BeifengjingSection,Bed26,ZhongliangHill	23388.7	44919500
Orthotetida	Perigeyerella_fastigiata	253.15	8.33	93.94	BeifengjingSection,Bed26,ZhongliangHill	11390.6	44919500
Orthotetida	Orthothetina_frechi	253.15	6.72	94.18	ChuanyanSection,P-TBed3,Xingwen	68698.1	44919500
Orthotetida	Paraorthotetina_glausi	253.15	-1.05	45.37	Amolsection,Beds26-29,lowerHerazValley	86849.7	44919500
Orthotetida	Derbyia_grandis	253.15	-41.31	56.44	KhundGhat,UpperProductus-limestone,SaltRange(Wynnecoll)	7067230	44919500
Orthotetida	Derbyia_hemisphaerica	253.15	-40.95	56.28	Chidru,UpperProductus-limestone,SaltRange	519580	44919500
Orthotetida	Arctitreta_intercalata	253.15	-51.38	61.96	PP1,CrestofPuchenpraridge,Manangarea,upperPuchenpraMember	35.1214	44919500
Orthotetida	Streptorhynchus_kayseri	253.15	6.57	96.35	WenjiangsiSection,Bed55,GuidingCounty	271971	44919500
Orthotetida	Meekella_kueichowensis	253.15	-15.21	88.48	HuaiMaePhlung,DoiPhaPhlung20F,LampangProvince	1181640	44919500
Orthotetida	Orthothetina_ladina	253.15	-1.07	32.78	B?lvanyNorthsection,bed1	26377.6	44919500
Orthotetida	Streptorhynchus_memor	253.15	-41.04	56.26	Eastofpt2263,ESEofChhidru,calcareoussandstone,K30.24-49,SaltRange	134.002	44919500
Orthotetida	Kiangsiella_pectiniformis	253.15	-41.31	56.44	KhundGhat,UpperProductus-limestone,SaltRange(Wynnecoll)	3521700	44919500
Orthotetida	Streptorhynchus_pelargonatus	253.15	8.33	93.94	BeifengjingSection,Bed26,ZhongliangHill	40000000	44919500
Orthotetida	Streptorhynchus_pendulus	253.15	5.35	99.34	MatanSectionAct544,Heshan	29793	44919500
Orthotetida	Orthothetina_persica	253.15	-1.51	44.68	ElikahRiversectionIR166,Alborzmountains	102484	44919500
Orthotetida	Streptorhynchus_plata	253.15	-50.28	61.85	W1256,KarnaliUnspecified	1530.77	44919500
Orthotetida	Derbyia_plicatella	253.15	-41.12	56.3	Aboutmidwayuphill2604NofFazalwali,SaltRange	10523.4	44919500
Orthotetida	Orthothetina_regularis	253.15	17.25	101.57	Bed13,MeishanCSection,ChangxingLimestone	773045	44919500
Orthotetida	Derbyia_regularis	253.15	-40.95	56.28	Chidru,UpperProductus-limestone,SaltRange	2053320	44919500
Orthotetida	Orthothetina_ruber	253.15	5.13	95.08	ZhongyingSectionBed21(QZ-3,2),QinglongCounty	5920400	44919500
Orthotetida	Derbyia_schellwieni	253.15	8.33	93.94	BeifengjingSection,Bed9,ZhongliangHill	3752730	44919500
Orthotetida	Schuchertella_semiplana	253.15	6.57	96.35	WenjiangsiSection,Bed56,GuidingCounty	29000000	44919500
Orthotetida	Orthothetina_shuangtangensis	253.15	8.33	93.94	BeifengjingSection,Bed26,ZhongliangHill	476972	44919500
Orthotetida	Derbyia_subaurita	253.15	-41.04	56.26	Eastofpt2263,ESEofChhidru,calcareoussandstone,K30.24-49,SaltRange	3090.69	44919500
Orthotetida	Derbyia_subsinuata	253.15	-41.04	56.26	Eastofpt2263,ESEofChhidru,calcareoussandstone,K30.24-49,SaltRange	1671.92	44919500
Orthotetida	Goniarina_subulata	253.15	-7.53	26.82	USNM9264,KakiVigla,SalamisIsland	335.468	44919500
Orthotetida	Derbyia_sulcata	253.15	1.04	-34.27	RustlerFormation,Locality1,RustlerSpring	132.982	44919500
Orthotetida	Streptorhynchus_tenuiplicatus	253.15	5.35	99.34	HeshanSection,Bed68	97.1644	44919500
Orthotetida	Ombonia_tirolensis	253.15	-1.07	32.78	B?lvanyNorthsection,bed1	26490.6	44919500
Orthotetida	Tropidelasma_triangularis	253.15	8.33	93.94	BeifengjingSection,Bed26,ZhongliangHill	68.7863	44919500
Orthotetida	Tropidelasma_zhongliangshanensis	253.15	8.33	93.94	BeifengjingSection,Bed26,ZhongliangHill	6221.59	44919500
Orthotetida	Streptorhynchus_operculatus	255.65	-42.6	55.94	JustNWofSathra,K28.625-642,SaltRange	405.353	44919500
Orthotetida	Orthothetina_peregrina	255.65	-3.16	45.27	UpperNurValley,CentralElburzMountains	554961	44919500
Orthotetida	Derbyia_buriensis	256.5	-43.18	55.96	NWofNali,K33.403-426,SaltRange	7700.76	44919500
Orthotetida	Kiangsiella_deltoidens	256.5	28.07	110.6	TakauchiLimestone,Yakuno,KyotoPrefecture	22583	44919500
Orthotetida	Orthothetina_dzhulfensis	256.5	-23.3	50.37	HambastMountains,Section6,Unit6	150325	44919500
Orthotetida	Meekella_julfensis	256.5	-3.14	39.98	Dorasham,AraxilevisBeds,DzhulfaGorge,AraxRiver	980.375	44919500
Orthotetida	Arctitreta_kempei	256.5	31.38	15.03	Brachiopoddal,LK410,WollastonForeland	11661.2	44919500
Orthotetida	Streptorhynchus_lenticularis	256.5	2.27	97.03	Erhp'u,Locality1327,Kueiyang-hsien	174649	44919500
Orthotetida	Streptorhynchus_luluigui	256.5	-51.32	104.94	GSWA69561,MillyitRange	47419.2	44919500
Orthotetida	Derbyia_regis	256.5	-8.75	26.83	USNM9260,Episkopi,HydraIsland	1.82538	44919500
Orthotetida	Streptorhynchus_stoschensis	256.5	31.19	14.58	KapStoschBlockNa	1088.71	44919500
Orthotetida	Geyerella_americana	262	4.1	-33.25	AMNH347,McKittrickCanyonDraw,GuadalupeMountains	113.945	44919500
Orthotetida	Orthothetina_azarjani	262	-5.75	40.51	Baisal,Bed29	2293.26	44919500
Orthotetida	Streptorhynchus_capuloides	262	-45.65	55.9	HillSWofSultanNaru,ESEofMusaKhel	292.569	44919500
Orthotetida	Tropidelasma_gregarium	262	4.03	-33.42	AMNH25,BenchMark4425,GuadalupeMountains	183.082	44919500
Orthotetida	Ombonia_guadalupensis	262	4.03	-33.42	AMNH25,BenchMark4425,GuadalupeMountains	170.72	44919500
Orthotetida	Orthothetina_iljinae	262	-5.42	40.81	Chanakhchi,KhachikFm	1511.45	44919500
Orthotetida	Derbyia_sulca	262	15.37	-35.83	CherryCreekRangeCCR-8	15606.7	44919500
Orthotetida	Orthothetina_vediensis	262	-5.75	40.51	BaisalMountain,WestSlope,KhachikGorizont	29781.3	44919500
Orthotetida	Streptorhynchus_capuloides	263.5	-44.97	54.43	ScarpslopesNWofBilot,Trans-IndusRange	630.207	38845900
Orthotetida	Streptorhynchus_lenticularis	263.5	35.6	104.33	Baianhua,JalaidQi	683803	38845900
Orthotetida	Magniderbyia_magnifica	263.5	32.67	107.76	SanhetuanSection,Bed11,WuchangArea	1009870	38845900
Orthotetida	Streptorhynchus_pelargonatus	263.5	34.04	101.35	ShabulengMountain,Zhaowuda,Bailinzuoqi	37800000	38845900
Orthotetida	Derbyia_regularis	263.5	35.3	103.45	Xiaosanjiazi,WujiatunFormation,Ke'erqinYouyiQianqi	3095380	38845900
Orthotetida	Meekella_attenuata	265.75	3.58	-33.51	USGS3764green,DiabloMountains	4055.51	38845900
Orthotetida	Derbyia_crenulata	265.75	3.32	-33.47	USGS2969green,southernDelawareMountains	1361.37	38845900
Orthotetida	Ombonia_guadalupensis	265.75	3.22	-33.51	USGS2962green,southernDelawareMountains	81.9347	38845900
Orthotetida	Derbyia_nasuta	265.75	3.58	-33.51	USGS3764green,DiabloMountains	1764.35	38845900
Orthotetida	Meekella_skenoides	265.75	3.13	-33.58	USGS3501green,JonesRanch,DelawareMountains	11632	38845900
Orthotetida	Derbyia_buriensis	266.5	-46.28	55.2	Baralnala,SWofAmb,K32.961-981,SaltRange	34.3417	38845900
Orthotetida	Derbyia_filosa	266.5	1.64	-33.05	USNM706d,HessCanyon,GlassMountains	32.508	38845900
Orthotetida	Tropidelasma_gregarium	266.5	3.55	-33.54	USNM731,PinyonTank,GuadalupeMountains	2.83465	38845900
Orthotetida	Orthothetina_iljinae	266.5	-8.48	41.34	BaisalMountain,WestSlope,GnishikFormation	71484.8	38845900
Orthotetida	Derbyia_pannucia	266.5	1.64	-33.05	USNM706d,HessCanyon,GlassMountains	983.106	38845900
Orthotetida	Arctitreta_pelicanensis	266.5	-73.2	-165.79	GS3616,ProductusCreek,LethamBurn(D44/f9478)	25028.9	38845900
Orthotetida	Perigeyerella_raffaellae	266.5	-36.6	52.73	HaushiUpliftOL4,Section1	277.667	38845900
Orthotetida	Perigeyerella_rutehiana	266.5	-9.96	47.14	KhoubanPassIR123,ElburzMountains	89.5912	38845900
Orthotetida	Derbyia_schellwieni	266.5	7.67	100.73	DushanSection,KufengFm,GuangdeCounty	2963.99	38845900
Orthotetida	Derbyia_sulca	266.5	15.23	-35.67	SpruceMountainSM-(-75)	1781.87	38845900
Orthotetida	Derbyia_texta	266.5	1.64	-33.05	USNM706d,HessCanyon,GlassMountains	1728.49	38845900
Orthotetida	Orthothetina_vediensis	266.5	-8.47	41.41	AvushGorge,GnishikGorizont	27445.5	38845900
Orthotetida	Tropidelasma_anthicum	270.25	1.38	-33.17	USNM706,HessCanyon,GlassMountains	17.7001	38845900
Orthotetida	Meekella_attenuata	270.25	3.35	-33.66	USGS2967green,ElCapitan,GuadalupeMountains	26999.5	38845900
Orthotetida	Meekella_calathica	270.25	1.36	-33.44	USNM700v,OldPayneRanch,GlassMountains	137.871	38845900
Orthotetida	Derbyia_cincinnata	270.25	1.36	-33.14	USNM703,OldWordRanch,GlassMountains	109.175	38845900
Orthotetida	Meekella_colpata	270.25	-30.94	100.51	USNM9269,Block1,KhaoChangHill,RatBuri	10.0608	38845900
Orthotetida	Derbyia_complicata	270.25	1.36	-33.14	USNM703,OldWordRanch,GlassMountains	105.464	38845900
Orthotetida	Tropidelasma_corniculum	270.25	1.36	-33.44	USNM700v,OldPayneRanch,GlassMountains	95.9241	38845900
Orthotetida	Derbyia_crenulata	270.25	1.38	-33.36	R.E.King54,SullivanPeak,GlassMountains	42.4999	38845900
Orthotetida	Bothrostegium_derbyoideum	270.25	1.36	-33.32	USNM710u,RoadCanyonFormation,SullivanRanch,GlassMountains	16.0553	38845900
Orthotetida	Derbyia_filosa	270.25	1.38	-33.17	USNM706c,HessCanyon,GlassMountains	1651.84	38845900
Orthotetida	Geyerella_inexpectata	270.25	1.38	-33.21	USNM726e,HessCanyon,GlassMountains	0.259706	38845900
Orthotetida	Derbyia_informis	270.25	1.36	-33.14	USNM703,OldWordRanch,GlassMountains	24.1735	38845900
Orthotetida	Streptorhynchus_johnstonei	270.25	-56.31	90.26	BMRML117,SouthernCrossBore,MiddalyaStation	1125.58	38845900
Orthotetida	Derbyia_laqueata	270.25	1.36	-33.44	USNM700v,OldPayneRanch,GlassMountains	77.0721	38845900
Orthotetida	Derbyia_nasuta	270.25	1.38	-33.16	R.E.King144,Hill5611,GlassMountains	64.4937	38845900
Orthotetida	Derbyia_pannucia	270.25	1.38	-33.17	USNM706c,HessCanyon,GlassMountains	1892.31	38845900
Orthotetida	Meekella_skenoides	270.25	1.38	-33.17	USNM706,HessCanyon,GlassMountains	27882.5	38845900
Orthotetida	Goniarina_striata	270.25	1.36	-33.32	USNM710u,RoadCanyonFormation,SullivanRanch,GlassMountains	15.2318	38845900
Orthotetida	Derbyia_texta	270.25	1.38	-33.17	USNM706c,HessCanyon,GlassMountains	768.082	38845900
Orthotetida	Meekella_attenuata	276	1.15	-34.44	USNM728l,CiboloRanch,SierraAltaCreek,ChinatiMountains	14942.8	721414
Orthotetida	Meekella_calathica	276	1.04	-33.6	USNM700l,DugoutMountain,GlassMountains	105.767	721414
Orthotetida	Meekella_caperata	276	1.06	-33.36	USNM705a,HessRanch,GlassMountains	4690.55	721414
Orthotetida	Derbyia_cincinnata	276	1.06	-33.31	USNM702c,OldWordRanch,GlassMountains	41.8784	721414
Orthotetida	Derbyia_complicata	276	1.04	-33.6	USNM700l,DugoutMountain,GlassMountains	43.5632	721414
Orthotetida	Derbyia_crenulata	276	1.05	-33.32	USNM702d,Hill5725,GlassMountains	17600.5	721414
Orthotetida	Goniarina_futilis	276	1.06	-33.26	USNM702,SplitTank,GlassMountains	24.2811	721414
Orthotetida	Niviconia_globosa	276	1.06	-33.26	USNM702a,SplitTank,GlassMountains	2.98336	721414
Orthotetida	Orthotetes_guppyi	276	-55.05	108.95	BMRKNA28,MountAndersonHomestead,GrantRange	8977.69	721414
Orthotetida	Meekella_hessensis	276	1.05	-33.32	USNM702d,Hill5725,GlassMountains	22138.2	721414
Orthotetida	Geyerella_hessi	276	1.06	-33.36	USNM705a,HessRanch,GlassMountains	938.116	721414
Orthotetida	Streptorhynchus_hoskingae	276	-57.14	91.27	BMRMG170,BarrabiddyDam,WandageeStation	785.998	721414
Orthotetida	Derbyia_informis	276	1.06	-33.26	USNM702,SplitTank,GlassMountains	40.9232	721414
Orthotetida	Meekella_intermedia	276	2.58	-34.07	USNM725c,Hill4402,BaylorMountains	18.7399	721414
Orthotetida	Orthotetes_jugorica	276	34.23	91.68	KhovsgolSomon,Unit6	174460	721414
Orthotetida	Arctitreta_kempei	276	38.17	36.08	KozhimRiver,Section5,LekvorkutaSvita,PechoraBasin	490340	721414
Orthotetida	Diplanus_lamellatus	276	1.04	-33.6	USNM700l,DugoutMountain,GlassMountains	15760.6	721414
Orthotetida	Derbyia_laqueata	276	1.06	-33.26	USNM702,SplitTank,GlassMountains	1162.15	721414
Orthotetida	Arctitreta_macrocardinalis	276	38.15	37.36	Adz'vaRiver,Section176,Bed28,PechoraBasin	87658.3	721414
Orthotetida	Derbyia_nasuta	276	1.06	-33.36	USNM705a,HessRanch,GlassMountains	17772.6	721414
Orthotetida	Meekella_occidentalis	276	1.06	-33.26	USNM702,SplitTank,GlassMountains	10445.5	721414
Orthotetida	Goniarina_permiana	276	2.58	-34.07	USNM725c,Hill4402,BaylorMountains	36819	721414
Orthotetida	Tropidelasma_pygmaeum	276	2.63	-34.08	R.E.King478,VictorioPeak,SierraDiablo	373.39	721414
Orthotetida	Diplanus_rarus	276	1.06	-33.36	USNM705a,HessRanch,GlassMountains	545.33	721414
Orthotetida	Meekella_skenoides	276	-5.54	-34.42	Locality3,QuebradadePortachuelo,firsthighwaterfall	28089	721414
Orthotetida	Kiangsiella_tingi	276	1.49	98.87	Nan'gang,QixiaFm,ShanggaoCounty	448.823	721414
Orthotetida	Tropidelasma_undulatum	276	1.08	-33.34	R.E.King105,HessRanchHorst,GlassMountains	19.0253	721414
Orthotetida	Meekella_attenuata	284.8	12.03	-36.91	UCMPD-5540,MurrySummit	1155.89	8647160
Orthotetida	Notostrophia_bifurcata	284.8	-58.59	159.31	UQL847,CracowStation(FairylandFormation)	10.479	8647160
Orthotetida	Derbyia_buchi	284.8	-0.8	-34.35	R.E.King198,HessRanchHorst,GlassMountains	3194.35	8647160
Orthotetida	Orthotetes_canadensis	284.8	35.38	-29.18	GSC53947,Section116C-1,TatondukRiver	892.391	8647160
Orthotetida	Meekella_circularis	284.8	0.7	-35.03	AMNH700,RedTankRoad,BaylorMountains	3867.29	8647160
Orthotetida	Orthothetina_curvata	284.8	29.72	66.39	Paojianggousection,Bed21,AET416,KeziliqimanFormation,TarimBasin	8501890	8647160
Orthotetida	Meekella_mexicana	284.8	1.62	-35.48	R.E.King443,RancheriaMountain,HuecoMountains	1667.66	8647160
Orthotetida	Orthotetes_canadensis	292.55	35.96	-23.79	GSC53710,Section116H-1A,PeelRiver	90591.6	8647160
Orthotetida	Arctitreta_costellata	292.55	-71.42	175.94	LakeRiver,GreatWesternTiers(EP168585)	1724.68	8647160
Orthotetida	Derbyia_dorsosulcata	292.55	18.29	108.35	Yukisawa,Yahagi-cho,RikuzentakadaCity	354.924	8647160
Orthotetida	Derbyia_grandis	292.55	-42.53	70.62	CaparayGharSectionC-1C,Beds26-31,Wardak	13595.3	8647160
Orthotetida	Derbyia_haroubi	292.55	-44.44	53.45	Huqf3	73.2349	8647160
Orthotetida	Meekella_striatocostata	292.55	-10.9	95.88	Longyin,LongyinFm,Pu'anCounty	781.315	8647160
Orthotetida	Derbyia_buchi	294.5	-29.5	-48.69	AMNH291,Bed16,Mameura,RioVilcanotasection2	458580	3907380
Orthotetida	Derbyia_carteri	296.95	-4.44	-36.6	USNM701,WolfCampHills,GlassMountains	145.709	3907380
Orthotetida	Diplanus_catatonus	296.95	-4.44	-36.6	USNM701,WolfCampHills,GlassMountains	156.704	3907380
Orthotetida	Derbyia_crassa	296.95	-1.43	-27.97	USGS14835,Beaumont	714193	3907380
Orthotetida	Tropidelasma_culmenatum	296.95	-4.44	-36.6	USNM701,WolfCampHills,GlassMountains	218.887	3907380
Orthotetida	Derbyia_cymbula	296.95	-0.3	-27.09	I70NN-7	100812	3907380
Orthotetida	Meekella_eximia	296.95	-10.84	96.63	Longyin,ShazitangFm,Pu'anCounty	753407	3907380
Orthotetida	Geyerella_kingorum	296.95	-4.44	-36.6	USNM701,WolfCampHills,GlassMountains	78.903	3907380
Orthotetida	Meekella_magnifica	296.95	-4.44	-36.6	USNM701,WolfCampHills,GlassMountains	138.649	3907380
Orthotetida	Meekella_prionota	296.95	-4.44	-36.6	USNM701,WolfCampHills,GlassMountains	3023.42	3907380
Orthotetida	Derbyia_profunda	296.95	-4.44	-36.6	USNM701,WolfCampHills,GlassMountains	226.582	3907380
Orthotetida	Diplanus_redactus	296.95	-4.44	-36.6	USNM701,WolfCampHills,GlassMountains	1001.62	3907380
Orthotetida	Chelononia_straminea	296.95	-4.45	-36.59	USNM701a3,WolfCampHills,GlassMountains	156.704	3907380
Orthotetida	Meekella_striaticostata	296.95	-0.88	-27.37	WBESK2-6	48716.8	3907380
Orthotetida	Meekella_striatocostata	296.95	-0.57	-27.09	USGS13709,Eskridge	2438570	3907380
Orthotetida	Meekella_texana	296.95	-4.45	-36.6	R.E.King93,WolfCampHills,GlassMountains	6540.51	3907380
Orthotetida	Derbyia_wabaunseensis	296.95	-0.88	-27.37	WBESK2-6	266620	3907380
Orthotetida	Orthotetella_wolfcampensis	296.95	-4.44	-36.6	USNM701,WolfCampHills,GlassMountains	5332.84	3907380
Orthotetida	Derbyia_crassa	302.925	3.54	-37.13	HonakerTrailFormation,Moab,Utah,Unit11C	652445	652445
Orthotetida	Meekella_striatocostata	305.175	4.71	-41.66	(ZoneofCylindricalTriticites)-BirdSpringFm.,ArrowCanyon	13232.1	652445
Orthotetida	Orthotetes_kaskaskiensis	322.25	-11.25	-38.11	VillageofMilo	24563.8	24563.8
Orthotetida	Orthotetes_kaskaskiensis	327	0.79	-39.46	USGS19283-PC	2235380	2235380
Orthotetida	Schellwienella_crenistria	332.9	-5.55	3.07	WeaverHillsDistrict,UpperWaterhousesLimestone	3875.89	270482
Orthotetida	Orthotetes_australis	335.85	-45.15	152.36	29-7,Malumla,WooloomaFormation,NewSouthWales,Australia	11644.2	270482
Orthotetida	Schuchertella_concentrica	335.85	-45.15	152.36	29-6,Malumla,WooloomaFormation,NewSouthWales,Australia	12548.2	270482
Orthotetida	Streptorhynchus_spinigera	335.85	-44.89	152.94	UniversityofNewSouthWalesCollectionL.233	8882.85	270482
Orthotetida	Orthotetes_kaskaskiensis	339.4	-10.08	-51.79	SeventhmemberoftheParadiseFormation	253758	270482
Orthotetida	Orthotetes_keokuk	344.05	-17.16	-32.56	Crawfordsville,UpperQuarry,Bed6	1772.12	1772.12
Orthotetida	Schuchertella_hardinensis	353	-21.65	-36.88	GlenParkFormation,stratigraphiclocality393(BrownBranch),PikeCo.,IL,Ea	20487.1	33129.7
Orthotetida	Schellwienella_inflata	357.25	-9.94	-45.47	Logan,unitF	236.024	33129.7
Orthotetida	Schuchertella_lens	357.25	-8.27	-44.98	SouthwestCrownMountain,UnitE	12521.8	33129.7
Orthotetida	Floweria_chemungensis	362.7	-19.69	-48.77	BrokenRibMember,DyerFm.,Locality1,GarfieldCo.,CO	125996	668197
Orthotetida	Schuchertella_lens	362.7	-27.46	-38.09	USGSLoc.593a	545187	668197
Orthotetida	Schuchertella_arctostriata	368.4	-14.21	-46.34	ThreeForks	56.1643	668197
Orthotetida	Floweria_chemungensis	377.8	-34.84	-25.72	WiscoySh.andSs.,JavaGp.,Tylothyris-SchizophoriaComm.,southernNewYork	23056.8	215414
Orthotetida	Floweria_prava	377.8	-25.86	-56.41	brachiopodsoftheFrasnianJeromeMbr,MartinFm	115159	215414
Orthotetida	Schuchertella_parva	379.9	-29.22	-37.59	Rockford(Ager)	77210.5	215414
Orthotetida	Floweria_arctostriata	385.9	-36.31	-26.35	TrilobiteBeds7,LudlowvilleFormation	4524.8	5721650
Orthotetida	Floweria_chemungensis	385.9	-36.9	-24.75	SouthLansing1C	1660.95	5721650
Orthotetida	Schuchertella_pandora	385.9	-38.72	-22.36	HighlandMills-KanouseSandstone-ErieCut	42606.1	5721650
Orthotetida	Xystostrophia_umbraculum	385.9	-25.8	36.53	CelechovicenaHane,Horizon9(Moravia)	5332190	5721650
Orthotetida	Schellwienella_umbraculum	385.9	-22.95	7.39	RW10,NE-Fazies,roadatthesouthernslopeofBuirerLey	397038	5721650
Orthotetida	Schuchertella_variabilis	385.9	-39.28	-25.3	Unit3,MontebelloMember,MahantangoFm.,Rockville,PerryCo.,PA	172.637	5721650
Orthotetida	Eoschuchertella_perversa	387.8	-38.49	-22.08	OO1ASchoharieValley	1283.63	5721650
Orthotetida	Schellwienella_sulivani	400.5	-59.5	-151.95	GydoFormation(1stShale),PrinceAlbertarea	36041.5	36041.5
Orthotetida	Schellwienella_lantenoisi	410.7	5.69	127.67	HaLang,LuocKhieuBeds	698.983	714.417
Orthotetida	Hipparionyx_major	410.7	-13.85	175.71	KilgowerSandstoneatTabberabbera,EasternVictoria	16.7706	714.417
Orthotetida	Schellwienella_umbraculum	410.7	5.69	127.67	HaLang,LuocKhieuBeds	698.983	714.417
Orthotetida	Iridistrophia_umbella	414.15	-45.34	52.94	KotysLimestoneoftheLochkovFm,Lockovian(CZE)	6.22057	53582.4
Orthotetida	Morinorhynchus_crispus	419.45	-19.91	7.49	DidymothyrisdidymaCommunity,Podolia	53582.4	53582.4
Orthotetida	Morinorhynchus_crispus	423.45	5.48	-50.02	Faunak,SectionAV4,DelormeFm.,MackenzieMts.	50056.2	7890230
Orthotetida	Coolinia_pecten	423.75	-19.08	-2.59	KlintebergBedsBrachiopods	7554030	7890230
Orthotetida	Plectotreta_lindstroemi	424.55	-19.73	-2.64	HallaBedsBrachiopods	1268.56	7890230
Orthotetida	Brachymimulus_americanus	425.55	-27.48	-58.43	ArticulateBrachiopods,St.ClairLimestone,BatesvilleDistrict,Arkansas	12049	7890230
Orthotetida	Coolinia_applanata	425.55	-29.65	-18.76	Dolerorthisrusticaassociation,FerritersCoveFm.,Dingle,Ireland	374475	7890230
Orthotetida	Streptis_glomerata	425.55	-27.48	-58.43	ArticulateBrachiopods,St.ClairLimestone,BatesvilleDistrict,Arkansas	24442.6	7890230
Orthotetida	Streptis_grayii	425.55	-20.89	0.96	Dicoelosiabiloba-PtychopleurellalamellosaComm.inSutkaiBeds,Grauzai-105bo	1733560	7890230
Orthotetida	Triplesia_putillus	425.55	-27.58	-51.5	Eohalysiocrinusstigmatus-SievertsiaAssoc.,VailStoneQuarry	10333.4	7890230
Orthotetida	Coolinia_subplana	425.55	-27.6	-43.28	Whitfieldella-RhynchotretaCommunityoftheRochesterShaleatSecondCreek	170080	7890230
Orthotetida	Schuchertella_subplana	425.55	-26.79	-45.06	NiagaraGorge-RochesterShale125-145feet	14876.6	7890230
Orthotetida	Schuchertella_tenuis	425.55	-27.49	-43.35	SalmonCreekEast&104-Rochester	8547.41	7890230
Orthotetida	Fardenia_ellipsoides	429.45	-10	-51.38	SouthernManitoba,InwoodFormation,BroadValley	44650	7890230
Orthotetida	Fardenia_transversalis	429.45	-10	-51.36	SouthernManitoba,FisherBranchDolomite,SaskatchewanRiver	142.65	7890230
Orthotetida	Streptis_grayi	433.3	-28.28	7.02	CalymenerestevensisCommunity,Restevosubsuite,Podolia	912.424	790980
Orthotetida	Coolinia_subplana	433.3	-25.78	-45.49	Monograptid-StrophochonetesCommunityatthelowermeteroftheWilliamsonShale	1748.14	790980
Orthotetida	Coolinia_applanata	435.95	-20.77	-54.11	BrandonBridge,30231,4,Orthislayer	666859	790980
Orthotetida	Coolinia_pecten	437.5	-61.35	67.66	Aegironetes-AulacopleuraComm.,ZelkoviceFmn.,PragueBasin	43888.4	790980
Orthotetida	Streptis_altosinuata	438.85	-21.45	-37.83	Gasp?Peninsula,Saint-JeanRiverAnticline,MatapediaGroup`	83264	790980
Orthotetida	Cliftonia_oxoplecioides	444.65	-37.68	-19.3	ChairofKildare,easternIreland	10500000	10500000
Orthotetida	Oxoplecia_holstonensis	455.2	-29.32	-65.96	Offshorezone-2,EastRidgeQuadrangle,LittleChickamaugaCreek	8240.45	8302.31
Orthotetida	Placotriplesia_spissa	455.2	-13.66	78.14	Anderkenyn-Akchoku,Chu-IliRange,sample8223	57.7099	8302.31
Orthida	Acosarina_minuta	251.8	10.18	93.54	HuayingSection,bed24b2,Linshui	19000000	24642800
Orthida	Kotlaia_strophiria	251.8	18.19	101.8	Huangzhishansection,Bed12,Huzhoucity	100737	24642800
Orthida	Enteletes_andrewsi	253.15	35.81	118.36	Maeda,LocalityB,OfunatoCity,MiyagiPrefecture	1287310	24642800
Orthida	Orthotichia_derbyi	253.15	-41.25	56.34	Virgal,topmostbedsofUpperProductus-limestone,SaltRange	11890.1	24642800
Orthida	Acosarina_dorashamensis	253.15	6.4	96	Pingqiao,P-1,ZhijinCounty	3201040	24642800
Orthida	Enteletes_dzhagrensis	253.15	-6.92	57.46	Kur-Istik1,UpperTakhtabulakFm	281097	24642800
Orthida	Enteletes_hemiplicata	253.15	9.17	100.79	Dapaichong,Huatang,ChenxianCounty	398734	24642800
Orthida	Enteletes_kayseri	253.15	6.57	96.35	WenjiangsiSection,Bed45,GuidingCounty	3511200	24642800
Orthida	Peltichia_kwangtungensis	253.15	-14.92	87.93	HuaiThakFormation	2683180	24642800
Orthida	Enteletes_lateroplicatus	253.15	-1.05	45.37	Amolsection,Bed34,lowerHerazValley	11830.8	24642800
Orthida	Enteletes_meridionalis	253.15	-6.92	57.46	Kur-Istik1,UpperTakhtabulakFm	594.399	24642800
Orthida	Acosarina_regularis	253.15	5.13	95.08	ZhongyingSectionBed26(QZ-8),QinglongCounty	735.126	24642800
Orthida	Enteletes_retardata	253.15	6.57	96.35	WenjiangsiSection,Bed45,GuidingCounty	234710	24642800
Orthida	Peltichia_ruzhencevi	253.15	-6.92	57.46	Kur-Istik2,LowerTakhtabulakFm	5630860	24642800
Orthida	Peltichia_sinensis	253.15	8.33	93.94	BeifengjingSection,Bed26,ZhongliangHill	230452	24642800
Orthida	Enteletes_subaequivalvis	253.15	-9.09	71.35	Lizai,Bed7,MountGeladundongArea,AnduoCounty,ZizhiDistrict	3296450	24642800
Orthida	Peltichia_transversa	253.15	9.25	93.76	HuayingshanSection,LinshuiCounty	1195190	24642800
Orthida	Enteletes_tschernyscheffi	253.15	-11.74	81.03	Luohedong,Tangyang,MuliCounty	3068320	24642800
Orthida	Enteletes_waageni	253.15	-9.09	71.35	Lizai,Bed7,MountGeladundongArea,AnduoCounty,ZizhiDistrict	3707810	24642800
Orthida	Peltichia_zigzag	253.15	5.62	95.64	JiaozishanSectionBed25(AJ-43),AnshunCounty	49583	24642800
Orthida	Enteletina_sublaevis	255.65	7.71	96.1	EnshiCounty,UpperPermian	488620	24642800
Orthida	Enteletina_acuteplicata	256.5	-43.14	55.98	NsideofLunwalaWahan,K29.44-57,58-74,N.ofNali,SaltRange	33.1326	24642800
Orthida	Acosarina_juresanensis	256.5	-42.69	55.76	RightbankofBakhravine,marlbands,ENEofMusaKhel,SaltRange	38.6751	24642800
Orthida	Enteletina_latesinuatus	256.5	-43.06	55.73	Virgal,corallimestone,upperMiddleProductus-limestone,SaltRange	90.2997	24642800
Orthida	Orthotichia_marmorea	256.5	-42.8	55.64	BazarWan,HardSiliceousLimestone,MiddleProductus,SaltRange	105672	24642800
Orthida	Enteletes_socialis	256.5	-43.14	55.98	HighcliffsofLunwalaWahan,SaltRange	515.941	24642800
Orthida	Enteletes_andrewsi	262	30.39	111.44	BogatayaRiver,UpperChandalaz,Muravyeva-AmurskogoPeninsula,Primorye	6384780	17540100
Orthida	Orthotichia_avushensis	262	-5.75	40.51	BaisalMountain,WestSlope,KhachikGorizont	167196	17540100
Orthida	Kotlaia_bistriata	262	-40.36	60.49	ShirinabadsectionIR648,ElburzMountains	29484.7	17540100
Orthida	Acosarina_incisiva	262	-45.41	55.6	Chambalwalagorge,marlyMiddleProductus,Narsinghphoar,SaltRange	559934	17540100
Orthida	Acosarina_minuta	262	-25.76	107.24	SungaiToh,Horizon2	11100000	17540100
Orthida	Enteletes_nucleolus	262	30.39	111.44	BogatayaRiver,UpperChandalaz,Muravyeva-AmurskogoPeninsula,Primorye	108652	17540100
Orthida	Enteletes_tschernyschewi	262	-6.62	18.17	SouiniaTS13,DjebelTebaga	254.31	17540100
Orthida	Enteletes_waageni	262	-6.61	18.2	UpperDolomiteSeries,Saikra,DjebelTebaga	6738.85	17540100
Orthida	Enteletes_angulatoplicata	266.5	31.01	90.51	JisuHonguer1190,EnteletesBed	0.529601	17540100
Orthida	Enteletes_wordensis	266.5	1.63	-33	R.E.King154,HessRanch,GlassMountains	3202	17540100
Orthida	Enteletes_conjunctus	270.25	-27.89	61.17	AliSangSectionB,Bed2,Wardak	36.5927	17540100
Orthida	Rhipidomella_cordialis	270.25	-31.3	107.55	USNM9271,Block3,KoMukIslandnortheast	2522.95	17540100
Orthida	Enteletes_densus	270.25	1.37	-33.22	USNM706f,RoadCanyonFormation,lowerHessCanyon,GlassMountains	1.82007	17540100
Orthida	Enteletes_dumblei	270.25	1.37	-33.23	R.E.King241,Hill5800,GlassMountains	40.7381	17540100
Orthida	Acosarina_juresanensis	270.25	-27.89	61.17	AliSangSectionB,Bed5,Wardak	23914.1	17540100
Orthida	Acosarina_mesoplatys	270.25	1.36	-33.14	USNM703,OldWordRanch,GlassMountains	122.926	17540100
Orthida	Enteletes_subnudus	270.25	1.38	-33.21	USNM721j,HessCanyon,GlassMountains	0.611088	17540100
Orthida	Kotlaia_waterhousei	270.25	-30.94	100.51	USNM9269,Block1,KhaoChangHill,RatBuri	36.0861	17540100
Orthida	Enteletes_wordensis	270.25	1.38	-33.17	USNM706,HessCanyon,GlassMountains	26.5144	17540100
Orthida	Acosarina_mesoplatys	272.25	1.43	-33.25	DeloD3,GlassMountains	23340.2	7543840
Orthida	Orthotichia_chekiangensis	276	2.53	97.46	Bailujian,Bed2,AnqingCounty	1624390	7543840
Orthida	Enteletes_dumblei	276	1.04	-33.3	R.E.King222,Hill5767,GlassMountains	12592.9	7543840
Orthida	Rhipidomella_hessensis	276	1.05	-33.32	USNM702d,Hill5725,GlassMountains	18754.8	7543840
Orthida	Rhipidomella_hispidula	276	1.04	-33.6	USNM700l,DugoutMountain,GlassMountains	17226.9	7543840
Orthida	Orthotichia_irregularis	276	2.65	-34.04	USNM728e,VictorioCanyon,SierraDiablo	219.369	7543840
Orthida	Enteletes_leonardensis	276	1.05	-33.59	USNM700x,DugoutMountain,GlassMountains	9309.31	7543840
Orthida	Enteletes_liumbonus	276	1.06	-33.35	R.E.King245,Hill5726,HessRanchHorst,GlassMountains	2467.16	7543840
Orthida	Acosarina_minuta	276	1.05	-33.57	USNM700y,DugoutMountain,GlassMountains	6048260	7543840
Orthida	Orthotichia_newelli	276	1.06	-33.36	USNM705a,HessRanch,GlassMountains	4734.45	7543840
Orthida	Enteletes_plummeri	276	1.04	-33.6	USNM700l,DugoutMountain,GlassMountains	4421.06	7543840
Orthida	Enteletes_rotundobesus	276	1.04	-33.49	USNM707,LenoxHills,GlassMountains	550.571	7543840
Orthida	Enteletes_stehlii	276	1.06	-33.36	USNM705a,HessRanch,GlassMountains	8784.29	7543840
Orthida	Enteletes_subcircularis	276	1.05	-33.32	USNM702e,Hill5725,GlassMountains	3319.54	7543840
Orthida	Orthotichia_kozlowskii	284.8	-0.83	-34.4	USNM705k,LeonardMountain,GlassMountains	7343.66	10500.8
Orthida	Acosarina_minuta	284.8	29.87	68.81	UzunbulakSection,Bed15,Piqiang,ArtuxCity	3102.05	10500.8
Orthida	Rhipidomella_cora	292.55	-34.43	-45.14	CopacabanaFm:ApillapampaSample6-2539	39533	27994700
Orthida	Enteletes_hemiplicata	292.55	-11.68	97.43	GP20,Bunuosection,Changmedistrict,Longlincounty	22100000	27994700
Orthida	Orthotichia_kozlowskii	292.55	-3.26	-35.88	USNM705m,LenoxHillsFormation,LeonardMountain,GlassMountains	27317.5	27994700
Orthida	Orthotichia_morganiana	292.55	36.78	-22.01	GSC53857,Section116P-10,RichardsonMountains	11741.3	27994700
Orthida	Parenteletes_superbus	292.55	-3.24	-35.87	USNM709t,LenoxHillsFormation,LeonardMountain,GlassMountains	1403.62	27994700
Orthida	Enteletes_wolfcampensis	292.55	-3.26	-35.88	USNM705m,LenoxHillsFormation,LeonardMountain,GlassMountains	4890.27	27994700
Orthida	Enteletes_gibbosus	294.5	-26.67	-50.65	AMNH301,Bed58a,RasuvilcaHillssection9,PajegeCanyon	797783	27994700
Orthida	Enteletes_kayseri	294.5	27.89	69.75	Kukurtuk-Tal,TianShan	24404.9	27994700
Orthida	Rhipidomella_pecosi	294.5	27.89	69.75	Kukurtuk-Tal,TianShan	21100000	27994700
Orthida	Rhipidomella_carbonaria	296.95	-0.03	-27.18	TC1-22	350312	27994700
Orthida	Parenteletes_cooperi	296.95	-4.45	-36.61	USNM701l,WolfCampHills,GlassMountains	6270.63	27994700
Orthida	Enteletes_lamarcki	296.95	-19.7	102.8	ThamNamMaholan,BanNongHin,ChangwatLoei	3838.82	27994700
Orthida	Enteletina_mirabilis	296.95	-10.84	96.63	Longyin,ShazitangFm,Pu'anCounty	2475.32	27994700
Orthida	Rhipidomella_miscella	296.95	-4.45	-36.59	USNM701a3,WolfCampHills,GlassMountains	194.799	27994700
Orthida	Acosarina_rectimarginata	296.95	-4.44	-36.6	USNM701,WolfCampHills,GlassMountains	1.22729	27994700
Orthida	Rhipidomella_carbonaria	309.85	-5.56	-29.49	Loc.19.TributarytoDrywoodCreek,justwestofbridgewheresectioncrossesstream,3milesnorthwestofMoundville	86549.3	86549.3
Orthida	Schizophoria_altirostris	316.35	1.62	-43.88	SnapCanyon,USGS22269-PC	585.738	585.738
Orthida	Schizophoria_depressa	322.25	3.9	-41.06	ArcoHillstypesection,wackestone	12833.4	141596
Orthida	Schizophoria_resupinata	322.25	-0.82	6.01	Wensleydale,MainLimestoneIX	130104	141596
Orthida	Schizophoria_resupinata	332.9	-5.55	3.07	WeaverHillsDistrict,UpperWaterhousesLimestone	601890	614884
Orthida	Rhipidomella_australis	335.85	-44.89	152.94	UniversityofNewSouthWalesCollectionL.233	9311.13	614884
Orthida	Rhipidomella_fortimuscula	335.85	-44.69	152.81	BigCreek,Section90,Bed90-6,UnnamedFm.aboveFlagstaffSS.	15.05	614884
Orthida	Schizophoria_verulamensis	335.85	-44.89	152.94	UniversityofNewSouthWalesCollectionL.233	13095.3	614884
Orthida	Perditocardinia_dubia	340.5	-18.28	-32.61	SomersetSh.Member,SalemLs.,IU16715,TaylorCo.,KY	755.288	614884
Orthida	Rhipidomella_michelini	342.2	-8.22	-1.89	FeltrimHill,Waulsortianbuildup,covershales	14339.8	14339.8
Orthida	Schizophoria_resupinata	342.2	-8.22	-1.89	FeltrimHill,Waulsortianbuildup,covershales	1580.41	14339.8
Orthida	Rhipidomella_australis	353	-30.49	144.01	Watts,Babbinboon	26473.2	16418600
Orthida	Schizophoria_chouteauensis	353	-19.84	-35.94	WassonvilleFm.,southeasternIowa	133.709	16418600
Orthida	Rhipidomella_diminutiva	353	-22.62	-41.65	Kenwood,OK,CarnegieMuseumcollectionSL407	360397	16418600
Orthida	Schizophoria_hortonensis	353	-21.68	-36.88	GlenParkFormation,stratigraphiclocality392(HortonCreek),PikeCo.,IL,Ea	1134.36	16418600
Orthida	Rhipidomella_maharuga	353	-36.27	15.83	AwaynatWanintypesect.,TaharaFmn.,samplesSM409&RA642	659.746	16418600
Orthida	Rhipidomella_michelini	353	-14.74	-0.3	BlackRockLimestonefromBurringtonCombe,Bed6,LowerCarboniferous,(Middle-	14200000	16418600
Orthida	Schizophoria_resupinata	353	-14.74	-0.3	BlackRockLimestonefromBurringtonCombe,Bed10,LowerCarboniferous,(Middle	579522	16418600
Orthida	Rhipidomella_rockportensis	353	-21.68	-36.88	GlenParkFormation,stratigraphiclocality392(HortonCreek),PikeCo.,IL,Ea	131.294	16418600
Orthida	Rhipidomella_missouriensis	357.25	-27.03	-33.91	FaunafromthePetersSwitchBedoftheCleggCreekMember,NewAlbanyShale(Up	2146970	16418600
Orthida	Rhipidomella_perminuta	357.25	-27.16	-34.07	JacobsChapelBedFauna,NewAlbanyshale	10058.2	16418600
Orthida	Schizophoria_australis	362.7	-19.69	-48.77	BrokenRibMember,DyerFm.,Locality1,GarfieldCo.,CO	302784	1242680
Orthida	Aulacella_interlineata	362.7	-15.95	5.22	AutobahnknotenLangenhorstC3-bed	376863	1242680
Orthida	Rhipidomella_missouriensis	362.7	-27.02	-38.48	USGSLoc.552	562385	1242680
Orthida	Schizophoria_impressa	368.4	-30.07	-26.28	Alfred	997.12	1242680
Orthida	Schizophoria_striatula	368.4	-14.19	-46.32	MudSpring,localityno.260a	72393.5	1242680
Orthida	Cariniferella_carinata	372.2	-32.12	-26.78	Locality3RockCity	41874	50708600
Orthida	Schizophoria_striatula	372.2	-14.95	-79.55	PortRefugio,SuemezIsland	50400000	50708600
Orthida	Cariniferella_tioga	372.2	-32.21	-25.32	Locality10Sexton'sQuarryPineValley	45.6437	50708600
Orthida	Cariniferella_alleni	379.9	-30.33	-54.67	Ashcanyon	7195.42	50708600
Orthida	Schizophoria_amanaensis	379.9	-30.41	-37.53	BrachiopodsofIndependenceShaleinIowa	467662	50708600
Orthida	Schizophoria_floydensis	379.9	-29.03	-37.29	BrachiopodsofRockGroveMbr.,ShellRockFm.,North-CentralIowa	1780.28	50708600
Orthida	Schizophoria_impressa	379.9	-29.22	-37.6	RockfordbrickandTileCompanypit,LimeCreekFormation,Iowa	283876	50708600
Orthida	Stainbrookia_infera	379.9	-29.25	-37.65	BrachiopodsofupperJuniperHillMbr.,LimeCreekFm.,North-CentralIowa	1632.65	50708600
Orthida	Schizophoria_iowensis	379.9	-29.22	-37.59	Rockford(Ager)	290624	50708600
Orthida	Cariniferella_iowensis	379.9	-30.41	-37.53	BrachiopodsofIndependenceShaleinIowa	559.994	50708600
Orthida	Schizophoria_minor	379.9	-29.22	-37.59	Rockford(Guber)	35.1912	50708600
Orthida	Cariniferella_carinata	382.1	-35.33	-26.38	JacksonSummitquad	13918.6	70747000
Orthida	Schizophoria_iowensis	382.1	-32.68	-36.81	RockIsland	15996.5	70747000
Orthida	Schizophoria_striatula	382.1	6.12	23.48	Shubartaubioherm,SouthernUrals,Givetian-Frasnianboundary	34085.6	70747000
Orthida	Cariniferella_carinata	385.9	-36.61	-26.3	Locality3,WKBWradiotowers,MoscowandLudlowvilleFormations,ErieCo.,NY	2704.4	70747000
Orthida	Rhipidomella_cyclas	385.9	-36.9	-24.75	SouthLansing1A	1347.61	70747000
Orthida	Aulacella_eifeliensis	385.9	-31.97	21.99	Tibidy,KersadiouFormation,bed3	9165440	70747000
Orthida	Schizophoria_ferronensis	385.9	-36.41	-30.96	SilicaFormationUnit1	854.877	70747000
Orthida	Rhipidomella_leucosia	385.9	-39.24	-25.54	Unit1,uppershalemember,MahantangoFm.,Dromgold,PA	15904.8	70747000
Orthida	Rhipidomella_penelope	385.9	-36.52	-26.09	BCVS1-3,BuffaloCreek,WanakahShale,ErieCo.,NY	37220.8	70747000
Orthida	Schizophoria_schnuri	385.9	-25.8	36.53	CelechovicenaHane,Horizon9(Moravia)	5537440	70747000
Orthida	Schizophoria_striatula	385.9	-0.12	115.16	DaleandZhongpingVillages,Section2,Loc.47	56300000	70747000
Orthida	Rhipidomella_vanuxemi	385.9	-36.61	-26.12	Locality1(WanakahShale,CazenoviaCreek,NY)	54798.2	70747000
Orthida	Isorthis_propinqua	390	-38.65	-25.41	WesternArea,ZoneI(centralfacies),OnondagaLimestone,NY	1698.58	70747000
Orthida	Schizophoria_vulvaria	397.2	-42.98	35.35	ArauzFormation,shalemember,Palencia,NSpain	284928	284928
Orthida	Isorthis_alpha	410.7	-13.85	175.71	Loc.46,southofthenorthbranchofHundredAcreCreek	16.8654	7471360
Orthida	Prokopia_bouskai	410.7	-40.99	49.9	ReporyjeLimestoneofthePragian(CZE)	63175.8	7471360
Orthida	Cortezorthis_perryi	410.7	-0.06	-41.46	BrachiopodsofthePragianofRoyalCreek,Yukon	29.7409	7471360
Orthida	Schizophoria_provulvaria	410.7	-29.3	-4.55	BullCove(RameHead)	7381730	7471360
Orthida	Isorthis_allani	412.55	-12.84	174.83	BrachiopodsofMaoristrophiakebleiSubcommunity,HumevaleFm.,Gill'sloc.13	10800000	50312600
Orthida	Platyorthis_cimex	412.55	8.68	127.91	SongMua,SongMuaBeds	131376	50312600
Orthida	Resserella_elegantuloides	414.15	-63.15	24.92	Faunaoflevel3(basalDevonian,basalRichGroup)Anti-Atlas	44500000	50312600
Orthida	Rhipidomella_frequens	414.15	-18.49	9.65	MitkovBedsatS-DboundarysectionsinDniestrValley	9213.79	50312600
Orthida	Dalejina_frequens	414.15	-18.49	9.65	ArticulateBrachiopodsoftheMitkovBeds,BorshchovStage,Podolia	107319	50312600
Orthida	Platyorthis_monnieri	414.15	-63.15	24.92	Faunaoflevel3(basalDevonian,basalRichGroup)Anti-Atlas	269065	50312600
Orthida	Isorthis_orbicularis	414.15	-18.13	6.11	LowerKockBedsofKockIG-1section	167542	50312600
Orthida	Salopina_submurifer	414.15	-1.98	-30.51	PrinceofWalesIsland(GSCC26911)	90709.7	50312600
Orthida	Isorthis_szajnochai	414.15	-18.49	9.65	MitkovBedsatS-DboundarysectionsinDniestrValley	49929.2	50312600
Orthida	Isorthis_canaliculata	417.35	-45.27	58.94	Mesodouvillina-QuadrifariusCommunityintheHolyCrossMountains	210301	50312600
Orthida	Salopina_crassiformis	417.35	-18.58	7.3	CalymenednestrovianaCommunity,Zvenigorodsuite,Podolia	4.67347	50312600
Orthida	Dalejina_hybrida	417.35	-16.98	3.75	Dayiaminor-Isorthiscanaliculata-LioclemaexileComm.,SWByelorussia	3280500	50312600
Orthida	Isorthis_ovalis	417.35	-15.1	0.79	IsorthisovalisComm.ofJuraForm.	21390.9	50312600
Orthida	Levenea_canaliculata	419.45	-19.91	7.49	DidymothyrisdidymaCommunity,Podolia	30475.4	50312600
Orthida	Isorthis_markovskii	419.45	36.88	7.97	PseudocamarotoechiaubsuensisCommunity,BaitalFormation,C.Tuva	66233.9	50312600
Orthida	Salopina_lunata	420	-25.67	-12.35	Ludlow-MuchWenlockDistrict1	92132.6	50312600
Orthida	Isorthis_orbicularis	420	-26.06	-11.81	S.wilsoni-I.orbicularis-M.nuculaAssociationofWalesandWelshBorderland	59957.8	50312600
Orthida	Dolerorthis_rustica	420	-16.54	-2.22	longwallonKaupungsklintHillock,Ardre	22846	50312600
Orthida	Dalejina_ambigena	422.1	-53.06	58.36	Loc.4.4,SmokingQuarryTrench,Kozolupy,beds3-16andup	6745.42	14925300
Orthida	Isorthis_amplificata	422.1	-21.16	3.61	Glassiaobovata-Septatrypasubaequalis-HennigoporaflexuosaComm.,SWByelorussia	261287	14925300
Orthida	Dicoelosia_biloba	422.1	-25.03	-49.33	RacineFm,Milwaukee,HartungQuarry,34489-Patzkowsky	11100000	14925300
Orthida	Ptychopleurella_bouchardi	422.1	-18.68	-2.46	SandarveKulle,steephillock1kmnorthofFardhemChurch	153626	14925300
Orthida	Resserella_canalis	422.1	-25.03	-49.33	RacineFm,Milwaukee,HartungQuarry,34489-Patzkowsky	14400000	14925300
Orthida	Isorthis_clivosa	422.1	-25.03	-49.33	RacineFm,Milwaukee,HartungQuarry,34499-Patzkowsky	1845270	14925300
Orthida	Dalejina_hybrida	422.1	-27.87	-12.37	Ledbury,nearKnappLane.Section4B	2262660	14925300
Orthida	Salopina_mediocostata	422.1	2.02	175.8	Striispirifer'-SpirinellaCommunity,YarralumlaFormation,Canberraloc.CC75	3917.42	14925300
Orthida	Platystrophia_biforata	423.45	-24.32	-50.14	Pisocrinus-GissocrinusAssoc.,SEWisconsin,NEIllinois,andNIndiana	595904	14925300
Orthida	Isorthis_boreaina	423.45	5.48	-50.02	Faunak,SectionAV4,DelormeFm.,MackenzieMts.	88.7223	14925300
Orthida	Ptychopleurella_lenzi	423.45	5.48	-50.02	Faunak,SectionAV4,DelormeFm.,MackenzieMts.	21935.1	14925300
Orthida	Isorthis_microscapha	423.45	5.48	-50.02	Faunak,SectionAV4,DelormeFm.,MackenzieMts.	88.7223	14925300
Orthida	Dicoelosia_paralata	423.45	5.48	-50.02	Faunak,SectionAV4,DelormeFm.,MackenzieMts.	264873	14925300
Orthida	Resserella_elegantula	423.75	-19.08	-2.59	KlintebergBeds:FossilsofHoburgen-typereeflimestone(Manten1971,TableIX)	2156900	14925300
Orthida	Dolerorthis_rustica	423.75	-19.08	-2.59	KlintebergBeds:FossilsofHoburgen-typereeflimestone(Manten1971,TableIX)	812677	14925300
Orthida	Isorthis_cliens	424.55	-54.92	58.48	Loc.4.1,ListiceSect.,Beroun,Listicesect.760,Motol	591.426	14925300
Orthida	Rhipidomella_hybrida	424.55	-19.73	-2.64	HallaBeds:FossilsofHoburgen-typereeflimestone(Manten1971,TableIX)	1163020	14925300
Orthida	Isorthis_loveni	424.55	-20.06	-2.47	MuldeBedsBrachiopods	2965.29	14925300
Orthida	Mendacella_venustula	424.55	-54.92	58.48	Loc.4.1,ListiceSect.,Beroun,Listicesect.760,Motol	1663.69	14925300
Orthida	Resserella_basalis	425.55	-21.42	1.27	Skeinidioideslewisii-IsorthisamplificataComm.inUp.Riga&Lo.GeluvaFmns.	10606.5	14925300
Orthida	Orthostrophella_clairensis	425.55	-27.48	-58.43	ArticulateBrachiopods,St.ClairLimestone,BatesvilleDistrict,Arkansas	12026.9	14925300
Orthida	Epitomyonia_clausula	425.55	6.18	-50.81	SectionAV1,Level641m,DelormeFm.,AvalancheLakeArea,MackenzieMts.	50079.1	14925300
Orthida	Dalmanella_elegantula	425.55	-26.79	-45.06	NiagaraGorge-RochesterShale120-124feet	11859.7	14925300
Orthida	Orthostrophia_fasciata	425.55	-26.79	-45.06	NiagaraGorge-RochesterShale120-124feet	133.213	14925300
Orthida	Orthis_flabellites	425.55	-26.79	-45.06	NiagaraGorge-RochesterShale120-124feet	4544.16	14925300
Orthida	Ptychopleurella_lamellosa	425.55	-20.89	0.96	Dicoelosiabiloba-PtychopleurellalamellosaComm.inSutkaiBeds,Grauzai-105bo	2577.9	14925300
Orthida	Onniella_pashkevichiusi	425.55	-21.42	1.27	Skeinidioideslewisii-IsorthisamplificataComm.inUp.Riga&Lo.GeluvaFmns.	1501.92	14925300
Orthida	Resserella_sabrinae	425.55	-20.89	0.96	Skeinidioideslewisii-IsorthisamplificataComm.inGrauzaiborehole	54764.9	14925300
Orthida	Ravozetina_sawddensis	425.55	-21.42	1.27	Skeinidioideslewisii-IsorthisamplificataComm.inUp.Riga&Lo.GeluvaFmns.	1501.92	14925300
Orthida	Isorthis_slitensis	425.55	-24.73	7.27	StriispiriferplicatellusCommunity,Yarugaseries,Podolia	2706	14925300
Orthida	Visbyella_visbyensis	425.55	-16.19	-1.09	Dicoelosia-SkenidioidesComm.inEBaltic	538367	14925300
Orthida	Epitomyonia_amplissima	425.8	4.72	-49.33	Faunaj,SectionAV2,DelormeFm.,MackenzieMts.	707.633	14925300
Orthida	Neoplatystrophia_jaaniensis	427.2	-21.59	-2.97	UpperVisbyBedsBrachiopods	2039.06	14925300
Orthida	Linoporella_punctata	427.2	-21.64	-2.85	HogklintBedsBrachiopods	218.449	14925300
Orthida	Orthis_tenuidens	427.2	-26.72	-44.56	MaplewoodPark-LowerIrondequoit	32.4116	14925300
Orthida	Dicoelosia_verneuiliana	427.2	-21.64	-2.77	VisbyC	2234.2	14925300
Orthida	Hesperorthis_davidsoni	429.45	-9.49	-51.71	SManitoba,CedarLakeDolomite,ChemahawinMem,FortIsland,CedarLake	40457	14925300
Orthida	Dicoelosia_alticavata	432.1	-23.46	-8.25	Atrypa'reticularis'-DicoelosiaalticavataCommunityatMalmoykalven	11888.5	5982920
Orthida	Platystrophia_biforata	432.1	-21.15	-55.98	FerganellaCommunity,Massilon,Iowa.	163979	5982920
Orthida	Dicoelosia_biloba	432.1	-22.54	-34	AnticostiIsland,TheJumpers,UpperJupiterFormation	3054350	5982920
Orthida	Rhipidomella_circulus	432.1	-25.53	-45.68	MudgeCreek-Wolcott	6312.19	5982920
Orthida	Dalmanella_elegantula	432.1	-25.44	-45.94	SalmonCreekWest-Williamson	5036.56	5982920
Orthida	Flabellitesia_flabellites	432.1	-20.89	-55.98	Marsupiocrinus(Amarsupiocrinus)-ManticrinusAssoc.,EasternIowa	191313	5982920
Orthida	Isorthis_mackenziei	432.1	-23.59	-8.39	PentameroidessubrectusCommunity,VikFormation,atKampebraten	2712.97	5982920
Orthida	Isorthis_prima	432.1	-23.5	-8.36	Chr.Skredsviksvei	82281.8	5982920
Orthida	Orthis_tenuidens	432.1	-25.51	-45.77	SecondCreekatAlsaFarms-Williamson	409.441	5982920
Orthida	Visbyella_visbyensis	432.1	-15.63	-20.62	Isorthismackenziei-pelmatozoanAssoc.,PentlandHills	93169.8	5982920
Orthida	Resserella_elegantula	433.3	-25.89	-45.43	Clorinda-EoplectodontaSubcommunityoftheRockwayFormation	484.912	5982920
Orthida	Dalejina_hybrida	433.3	-28.27	6.9	Dicoelosiaparalata-Skenidioidessp.Community,Podolia	822813	5982920
Orthida	Dalmanella_edgewoodensis	435.95	-22.27	-58.47	EdgewoodGroup,LocalityA	38489	5982920
Orthida	Dicoelosia_osloensis	435.95	-24.6	-8.52	Eoplectodonta-Isorthisassociation,SolvikFm.,Oslo,Norway	75460.4	5982920
Orthida	Dolerorthis_plicata	435.95	-24.6	-8.52	Stricklandia-coralassoc.,SolvikFm.,Osloregion,Norway	41865.5	5982920
Orthida	Dolerorthis_sowerbyiana	435.95	-32.92	-15.96	FfriddMathrafal(Meifod6701)	234296	5982920
Orthida	Dicoelosia_verneuiliana	435.95	-25.12	-3.55	Likershamn	35168.1	5982920
Orthida	Mendacella_bleikeriensis	437.5	-25.72	-8.82	Dicoelosiaosloensis-RhinoporamalmoensisComm.,LeangenMbr.ofSolvikFormatio	15849.5	5982920
Orthida	Resserella_matutina	437.5	-25.76	-8.94	Jongs?skollen	4.4553	5982920
Orthida	Schizonema_subplicatum	437.5	-15.2	-23.19	200meastofNewlandsFarmintheCraigheadInlier	33102.4	5982920
Orthida	Hirnantia_sagittifera	438.85	-22.24	-36.77	Perceregion,CapBlanc,Hirnantian,talusslope-Patzkowsky	6513.4	5982920
Orthida	Schizonema_capillatum	439.85	-34.74	-16.54	NB02	2846.4	5982920
Orthida	Dolerorthis_gwalia	439.85	-34.93	-16.47	SB03	289.761	5982920
Orthida	Mendacella_mullockiensis	439.85	-34.71	-16.59	NB01A	3550.07	5982920
Orthida	Ravozetina_rava	439.85	-34.74	-16.54	NB02	3151.64	5982920
Orthida	Dicoelosia_osloensis	440.8	-26.68	-8.82	Eoplectodontaduplicata-IsorthisprimaCommunity,O-Sboundary,Oslo-AskerDistr	30519.1	5982920
Orthida	Isorthis_prima	440.8	-26.68	-8.82	Eoplectodontaduplicata-IsorthisprimaCommunity,O-Sboundary,Oslo-AskerDistr	121350	5982920
Orthida	Dolerorthis_sowerbyiana	440.8	-26.68	-8.82	Eoplectodontaduplicata-IsorthisprimaCommunity,O-Sboundary,Oslo-AskerDistr	30519.1	5982920
Orthida	Mendacella_mullockiensis	441.35	-36.65	-16.82	Garth,G01	36181.5	5982920
Orthida	Dolerorthis_plicata	441.35	-26.68	-8.82	Stricklandia-coralass'n.ofSolvikFmn.inOslo-AskerDistricts	2553620	5982920
Orthida	Levenea_qianbeiensis	441.35	0.41	122.57	AFL30Jianshanhill	32684.2	5982920
Orthida	Dolerorthis_sotnerbaiana	441.35	-17.17	71.42	VSEGEILoc.412AkkermePeninsula,LakeBalkhash	6.60545	5982920
Orthida	Dalmanella_edgewoodensis	444.65	9.09	-55.39	SectionAV4B,Level112m,WhittakerFm.,AvalancheLakeArea,MackenzieMts.	1293010	102276000
Orthida	Kinnella_kielanae	444.65	-39.15	-16.97	EastofWenallt4	58600000	102276000
Orthida	Hirnantia_sagittifera	444.65	-56.44	73.23	Stawysection,nearLagow	100000000	102276000
Orthida	Dolerorthis_savagei	444.65	-21.99	-60.86	LocalityB.southedgeofLouisiana	104011	102276000
Orthida	Dalmanella_testudinaria	444.65	-56.44	73.23	Stawysection,nearLagow	80100000	102276000
Orthida	Vinlandostrophia_acutilirata	446.6	-27.6	-62.17	Mannie-Wilson,1949	122043	102276000
Orthida	Hebertella_alveata	446.6	-19.5	-55.43	Michigan,RichmondFmStoningtonBeds,BaydeNoeMember,Stratton'sDock	471.201	102276000
Orthida	Platystrophia_annieana	446.6	-26	-59.59	BardstownReef,Jeffersontown,JeffersonCo.,Kentucky	810.214	102276000
Orthida	Glyptorthis_bellarugosa	446.6	-8.69	-37.24	Silliman'sFossilMountBrachiopods	354473	102276000
Orthida	Retrorsirostra_carleyi	446.6	-27.48	-61.45	ArticulateBrachiopodsintheCentralBasin	135.524	102276000
Orthida	Platystrophia_clarksvillensis	446.6	-19.5	-55.43	Michigan,RichmondFmStoningtonBeds,BaydeNoeMember,Stratton'sDock	52510.1	102276000
Orthida	Vinlandostrophia_cypha	446.6	-26	-59.59	BardstownReef,Jeffersontown,JeffersonCo.,Kentucky	1241.11	102276000
Orthida	Salopina_horseshoensis	446.6	-1.37	-74.56	HorseshoeGulchUSNM18138b	8.67189	102276000
Orthida	Dicoelosia_indenta	446.6	-38.6	-16.04	Keisley	1703900	102276000
Orthida	Glyptorthis_insculpta	446.6	-25.78	-58.17	Strophomena-Lepidocycluscommunity,DillsboroFm.,Cincinnatiregion,Ohio	179891	102276000
Orthida	Dalmanella_jugosa	446.6	-19.5	-55.43	Michigan,RichmondFmStoningtonBeds,BaydeNoeMember,Stratton'sDock	43.138	102276000
Orthida	Austinella_kankakensis	446.6	-27.48	-61.45	ArticulateBrachiopodsintheCentralBasin	34498.1	102276000
Orthida	Vinlandostrophia_laticosta	446.6	-26	-59.59	BardstownReef,Jeffersontown,JeffersonCo.,Kentucky	21516.5	102276000
Orthida	Dalmanella_meeki	446.6	-27.48	-61.45	ArticulateBrachiopodsintheCentralBasin	101045	102276000
Orthida	Platystrophia_moritura	446.6	-19.5	-55.43	Michigan,RichmondFmStoningtonBeds,BaydeNoeMember,Stratton'sDock	943.788	102276000
Orthida	Dalmanella_multisecta	446.6	-25.15	-49.39	PulaskiShale,Dalmanella-Sowerbyellacommunity	189041	102276000
Orthida	Hebertella_occidentalis	446.6	-24.51	-58.94	Strophomenacommunity,upperTannersCr.Fm.,Indiana	709726	102276000
Orthida	Dinorthis_occidentalis	446.6	-9.43	-66.39	HuntMountain-BighornDolomite	26075.6	102276000
Orthida	Plaesiomys_occidentalis	446.6	-7.01	-51	CautionCreekFormation,Member1(ChurchillRiverExposure)	313.425	102276000
Orthida	Vinlandostrophia_ponderosa	446.6	-27.48	-61.45	ArticulateBrachiopodsintheCentralBasin	39902.1	102276000
Orthida	Plaesiomys_proavita	446.6	-27.48	-61.45	ArticulateBrachiopodsintheCentralBasin	589975	102276000
Orthida	Hebertella_sinuata	446.6	-25.84	-57.66	CowanLakeSpillway,BullForkFm.,ClintonCo.,Ohio	43540.5	102276000
Orthida	Diceromyonia_storeya	446.6	-9.43	-66.39	HuntMountain-BighornDolomite	302614	102276000
Orthida	Plaesiomys_subquadrata	446.6	-25.78	-58.17	Strophomena-Lepidocycluscommunity,DillsboroFm.,Cincinnatiregion,Ohio	407177	102276000
Orthida	Dicoelosia_inghami	447.55	-41.73	-19.09	Portrane	113718	102276000
Orthida	Plaesiomys_porcata	447.55	-42.46	-16.81	GlynCeiriog,DolhirFm.abovebasalunits	138242	102276000
Orthida	Bokotorthis_abayi	450.7	-12.57	70.55	Locality282.fromtheRiverBeisenba,2.8kmeastoftheRiverTaldyboi	8.44502	102276000
Orthida	Dinorthis_taukensis	450.7	-16.33	66.65	Locality397a-NorthofthetownofBestiube	621.213	102276000
Orthida	Paucicrura_corpulenta	450.75	-17.52	-61.06	SardesonCollection,MaquoketaFormation,ClermontMember	5370.3	102276000
Orthida	Platystrophia_hopensis	450.75	-25.93	-59.88	03-ACS-17.0	13496.8	102276000
Orthida	Paucicrura_rogata	450.75	-17.52	-61.06	SardesonCollection,MaquoketaFormation,ClermontMember	269059	102276000
Orthida	Vinlandostrophia_acutilirata	452.3	-26.06	-61.1	C5-0.5miWestofCliftyCreek	60007.5	3319460
Orthida	Plectorthis_aequivalvis	452.3	-26.98	-60.06	C2-Maysville	718.027	3319460
Orthida	Hebertella_alveata	452.3	-27.39	-61.06	C5-2miSofRichmond	7735.78	3319460
Orthida	Platystrophia_annieana	452.3	-25.79	-60.08	C5-2miNorthofOxford	8884.68	3319460
Orthida	Platystrophia_auburnensis	452.3	-26.12	-59.98	BigRRCutSofMaud	18274.6	3319460
Orthida	Retrorsirostra_carleyi	452.3	-25.92	-60.09	HanoverRRCut	11049.9	3319460
Orthida	Platystrophia_clarksvillensis	452.3	-25.75	-60.04	1miSoutheastofMorningSun	26782.5	3319460
Orthida	Platystrophia_crassa	452.3	-25.68	-59.71	Covington	60159.6	3319460
Orthida	Platystrophia_cummingsi	452.3	-25.68	-60.77	WeisburgtoGuilifordArea	858.735	3319460
Orthida	Vinlandostrophia_cypha	452.3	-26.06	-61.1	C5-0.5miWestofCliftyCreek	62829.8	3319460
Orthida	Platystrophia_elkhornensis	452.3	-25.33	-60.21	BranchofCedarCreek1	3451.64	3319460
Orthida	Plectorthis_fissicosta	452.3	-26.98	-60.06	C2-Maysville	47706.1	3319460
Orthida	Platystrophia_foerstei	452.3	-25.68	-60.77	WeisburgtoGuilifordArea	10087.7	3319460
Orthida	Platystrophia_hopensis	452.3	-25.77	-59.8	Scholsser'sQuarry	1133.7	3319460
Orthida	Diceromyonia_ignota	452.3	-7.86	-77.3	ElySpringsBrachiopods	289553	3319460
Orthida	Glyptorthis_insculpta	452.3	-16.95	-78.78	MontoyaGroup-Trans-PecosTexas	1468050	3319460
Orthida	Austinella_kankakensis	452.3	-16.95	-78.78	MontoyaGroup-Trans-PecosTexas	334139	3319460
Orthida	Vinlandostrophia_laticosta	452.3	-26.84	-61.76	C3-Maysvillian-Fredericktown	95222.9	3319460
Orthida	Dalmanella_meeki	452.3	-25.79	-60.23	Blacksmith'sHollowNearOregonia	80598.2	3319460
Orthida	Platystrophia_moritura	452.3	-25.75	-60.04	1miSoutheastofMorningSun	3649.05	3319460
Orthida	Dalmanella_multisecta	452.3	-29.19	-55.32	Dalmanellid-crinoidfaunaoftheSowerbyella-Onniellacommunity,Reedsvilleand	374145	3319460
Orthida	Hebertella_occidentalis	452.3	-16.95	-78.78	MontoyaGroup-Trans-PecosTexas	1718570	3319460
Orthida	Plectorthis_plicatella	452.3	-25.77	-59.8	Scholsser'sQuarry2	829266	3319460
Orthida	Vinlandostrophia_ponderosa	452.3	-26.06	-61.1	C5-0.5miWestofCliftyCreek	105771	3319460
Orthida	Austinella_scovellei	452.3	-25.92	-60.09	HanoverRRCut	113.245	3319460
Orthida	Hebertella_sinuata	452.3	-29.19	-55.32	OrthidfaunaoftheZygospira-Hebertellacommunity,ReedsvilleandMartinsburgF	105603	3319460
Orthida	Hebertella_subjugata	452.3	-26.06	-61.1	C5-0.5miWestofCliftyCreek	6543.7	3319460
Orthida	Platystrophia_sublaticosta	452.3	-26.12	-59.98	BigRRCutSofMaud	18186.1	3319460
Orthida	Plaesiomys_subquadrata	452.3	-25.79	-60.23	Blacksmith'sHollowNearOregonia	136044	3319460
Orthida	Platystrophia_pogrebovi	453.5	-30.85	-0.26	AluvereQuarry,southernwall	5241.32	3319460
Orthida	Howellites_wesenbergensis	453.9	-31.27	-0.37	RakvereStage,NorthernEstonia,RagavereFm,SibilaCore-Patzkowsky	40693.3	3319460
Orthida	Onniella_longa	454.75	-30.76	-7.07	Fj?cka,Mold?Lst	39010.5	3319460
Orthida	Dalmanella_fertilis	455	-29.74	-61.08	CatawbaCollection6	59604.3	3319460
Orthida	Plaesiomys_iphigenia	455	-26.82	-53.03	Bed124	6807.36	3319460
Orthida	Paucicrura_rogata	455	-26.82	-53.03	Bed101	1318950	3319460
Orthida	Platystrophia_amoena	455.2	-28.09	-66.37	Bigby-Cannon(UpperBigby)-Wilson,1949	625510	3319460
Orthida	Dinorthis_atavoides	455.2	-29.71	-61.63	CliffieldFormation,LincolnshireLimestoneMember,BurkesGarden	328.389	3319460
Orthida	Glyptorthis_bellarugosa	455.2	-28.09	-66.37	Pierce-Wilson,1949	815543	3319460
Orthida	Hebertella_borealis	455.2	-28.09	-66.37	Lebanon	3226.9	3319460
Orthida	Multicostella_brevis	455.2	-29.71	-61.63	BenboltFormation,ShannondaleLimestoneMember,OepikinaBeds,BurkesGarden	949.465	3319460
Orthida	Plectorthis_burultasica	455.2	-13.66	78.14	Anderkenyn-Akchoku,Chu-IliRange,sample628	2723.91	3319460
Orthida	Platystrophia_colbiensis	455.2	-28.09	-66.37	Catheys(shalyfacies)-Wilson,1949	22850.7	3319460
Orthida	Phragmorthis_conciliata	455.2	-13.66	78.14	Anderkenyn-Akchoku,Chu-IliRange,sample8223a	2965.31	3319460
Orthida	Campylorthis_deflecta	455.2	-17.82	-62.76	SardesonCollection,St.PeterSandstone	1818.93	3319460
Orthida	Platystrophia_elegantula	455.2	-28.09	-66.37	Bigby-Cannon(UpperBigby)-Wilson,1949	78282	3319460
Orthida	Eodalmanella_extera	455.2	-13.71	78.11	Kujandysai,Chu-IliRange,sample7611	2723.91	3319460
Orthida	Hebertella_frankfortensis	455.2	-28.09	-66.37	Bigby-Cannon(Bigby)-Wilson,1949	54829.1	3319460
Orthida	Doleroides_gibbosus	455.2	-29.25	-65.88	Offshorezone-7,RinggoldQuadrangle,HurricaneCreek	129.978	3319460
Orthida	Mimella_globosa	455.2	-29.96	-61.46	WardellFormation,StateHighway16,Receptaculitesbeds	440.513	3319460
Orthida	Dinorthis_interstriata	455.2	-29.6	-61.79	BenboltFormation,BurkesGardenLimestoneMember,WittenValley	1126.7	3319460
Orthida	Platystrophia_juvensis	455.2	-29.25	-66.08	Offshorezone+6,KensingtonQuadrangle,NofGAHighway143	253.374	3319460
Orthida	Heterorthina_macfarlani	455.2	-27.3	-63.22	GrierMbr.,LexingtonLimestone,Kentucky	59.6042	3319460
Orthida	Plaesiomys_meedsi	455.2	-17.82	-62.76	SardesonCollection,DecorahShale	434700	3319460
Orthida	Mimella_melonica	455.2	-29.25	-65.88	Offshorezone-7,RinggoldQuadrangle,HurricaneCreek	11409.8	3319460
Orthida	Pionodema_miniscula	455.2	-29.22	-66.19	Offshorezone-4,DurhamQuadrangle,northofCooperHeights	10838.6	3319460
Orthida	Pionodema_minuscula	455.2	-29.32	-65.96	Offshorezone-4,EastRidgeQuadrangle,LittleChickamaugaCreek	66.6793	3319460
Orthida	Desmorthis_nevadensis	455.2	-29.25	-65.88	Offshorezone-7,RinggoldQuadrangle,HurricaneCreek	129.978	3319460
Orthida	Pionodema_opima	455.2	-13.66	78.14	Anderkenyn-Akchoku,Chu-IliRange,sample8128	9.5238	3319460
Orthida	Hebertella_parkensis	455.2	-27.3	-63.22	MillersburgMbr.,LexingtonLimestone,Kentucky	465.44	3319460
Orthida	Dinorthis_pectinella	455.2	-28.09	-66.37	Hermitage(Curdsville)-Wilson,1949	580256	3319460
Orthida	Doleroides_pervetus	455.2	-19.26	-63.16	St.PeterSandstoneofSoutheasternMinnesota:Fountain	203925	3319460
Orthida	Multicostella_platys	455.2	-29.71	-61.63	BenboltFormation,ShannondaleLimestoneMember,OepikinaBeds,BurkesGarden	1317.56	3319460
Orthida	Platystrophia_precursor	455.2	-28.09	-66.37	Catheys(shalyfacies)-Wilson,1949	1774.58	3319460
Orthida	Dolerorthis_pristina	455.2	-13.66	78.14	Anderkenyn-Akchoku,Chu-IliRange,sample628	98.8575	3319460
Orthida	Dinorthis_quadriplicata	455.2	-29.71	-61.63	BenboltFormation,ShannondaleLimestoneMember,OepikinaBeds,BurkesGarden	1103.1	3319460
Orthida	Resserella_rogata	455.2	-29.25	-65.88	Offshorezone-7,RinggoldQuadrangle,HurricaneCreek	1779.53	3319460
Orthida	Dalmanella_rogata	455.2	-29.96	-61.46	EgglestonFormation,northofScales	29463.5	3319460
Orthida	Platystrophia_strigosa	455.2	-28.09	-66.37	Leipers(argillaceousfacies)-Wilson,1949	1774.58	3319460
Orthida	Pionodema_subaequata	455.2	-17.82	-62.76	SardesonCollection,DecorahShale	35282.4	3319460
Orthida	Fascifera_subcarinata	455.2	-29.3	-65.91	Offshorezone+1,RinggoldQuadrangle,northofRinggold	398.582	3319460
Orthida	Platystrophia_sublaticosa	455.2	-29.25	-66.08	Offshorezone+6,KensingtonQuadrangle,NofGAHighway143	253.374	3319460
Orthida	Mimella_superba	455.2	-29.71	-61.63	BenboltFormation,ShannondaleLimestoneMember,OepikinaBeds,BurkesGarden	1317.56	3319460
Orthida	Dinorthis_transversa	455.2	-29.71	-61.63	BenboltFormation,ShannondaleLimestoneMember,OepikinaBeds,BurkesGarden	11673.4	3319460
Orthida	Platystrophia_trentonensis	455.2	-17.82	-62.76	SardesonCollection,DecorahShale	619214	3319460
Orthida	Hesperorthis_tricenaria	455.2	-28.09	-66.37	Murfreesboro	733329	3319460
Orthida	Platystrophia_uxoris	455.2	-25.07	-54.67	TypesectioninKirkfieldQuarry,nearBobcaygeon,LakeSimcoeArea	155.116	3319460
Orthida	Mimella_vulgaris	455.2	-29.71	-61.63	BenboltFormation,ShannondaleLimestoneMember,OepikinaBeds,BurkesGarden	382.814	3319460
Orthida	Resserella_whittakeri	455.2	-25.07	-54.67	TypesectioninKirkfieldQuarry,nearBobcaygeon,LakeSimcoeArea	32.5065	3319460
Orthida	Cremnorthis_parva	456.65	-23.28	-31.27	Kilbride,DuncannonGroup,Caradoc,Ireland	14.2298	3319460
Orthida	Onniella_bancrofti	458.35	-36.87	-8.69	SularpShaleFormation,Bed:E55-b	24932	3319460
Orthida	Paucicrura_plana	458.35	-32.69	-0.53	AluvereQuarry,southernwall,Idavere	574.529	3319460
Orthida	Orthambonites_calligramma	463.45	18.76	55.18	NorthofPen-hsi-hu,secondtunnel	3126470	3254490
Orthida	Sigmelasma_pantherae	463.45	-0.72	-78.87	GreggRanch-LoversLeapUSNM18121cl.5-1	11.0773	3254490
Orthida	Orthidiella_extensa	464.65	-6.43	-82.16	D719CO	589.954	3254490
Orthida	Anomalorthis_lonensis	464.65	-7.76	-82.18	D963CO	9028.61	3254490
Orthida	Orthidiella_longwelli	464.65	-6.19	-81.25	Orthidiellacommunity,AntelopeValleyLs.,NyeCo.,Nevada	7605.79	3254490
Orthida	Orthambonites_michaelis	464.65	-8.32	-76.56	SwanPeakUnnamedCollection	1071.87	3254490
Orthida	Orthambonites_minisculus	464.65	-5.58	-80.35	ToquinaRange,AntelopeValleyLs.,Llanvirn(M.Ord.),Nevada	6057.68	3254490
Orthida	Anomalorthis_nevadensis	464.65	-7.78	-82.8	Anomalorthiscommunities,AntelopeValleyLs.,ClarkCo.,Nevada	28073.4	3254490
Orthida	Anomalorthis_oklahomensis	464.65	-6.43	-82.16	D706CO	43832.2	3254490
Orthida	Anomalorthis_utahensis	464.65	-8.32	-76.56	SwanPeakUnnamedCollection	57765.6	3254490
Orthida	Orthis_callactis	465.8	-36.87	-9.03	Husbyfj?l(Borensberg)	61.4046	3254490
Orthida	Retrorsirostra_carleyi	466	-26.88	-66.83	BullsRun	433.091	3254490
Orthida	Platystrophia_clarksvillensis	466	-26.88	-66.83	BullsRun	1707.33	3254490
Orthida	Vinlandostrophia_cypha	466	-26.88	-66.83	BullsRun	1707.33	3254490
Orthida	Glyptorthis_insculpta	466	-26.88	-66.83	BullsRun	1707.33	3254490
Orthida	Hebertella_occidentalis	466	-26.67	-66.85	C5-SilverCreektributary	5552.32	3254490
Orthida	Vinlandostrophia_ponderosa	466	-27.49	-68.21	C2-2.1miSofTaylorsvilleRd	10476.6	3254490
Orthida	Plaesiomys_subquadrata	466	-26.67	-66.85	C5-SilverCreektributary	970.923	3254490
Orthida	Shoshonorthis_michaelis	469.95	-7.8	-81.33	Hintze1951,DesertRangeExperimentalStationsections135-205	18146.3	3254490
Orthida	Hesperonomia_dinorthoides	472.3	-9.59	-80.05	UpperChertyMemberGardenCityFm.,ZoneJ,upperArenig,NEUtah	28748.3	44511.8
Orthida	Paralenorthis_robustus	472.9	-30.73	-55.69	USGSCO-3606	11.6844	44511.8
Orthida	Hesperonomia_antelopensis	475.2	-5.24	-84.04	D841CO	6525.71	44511.8
Orthida	Archaeorthis_elongata	475.2	-5.82	-85.23	NinemileShale,BedD722CO	1643.83	44511.8
Orthida	Hesperonomiella_minor	475.2	-7.38	-82.98	HintzefaunuleJ-16AfromIbex	7559.62	44511.8
Orthida	Nanorthis_putilla	483.45	-10.31	-75.54	10205',ShellOilCo..,32-33B,N.P.Unit,S.W.Richeyfield	11509.5	11509.5
Orthida	Eoorthis_indianola	494.65	-11.88	-82.27	BR86,DeadwoodForm.,BlackHills,SouthDakota-StittandStraatmann1997	112.074	91185.1
Orthida	Eoorthis_remnicha	494.65	-10.03	-79.37	SWRicheyField,DeadwoodFm.,Conaspiszone,Montana	91073.1	91185.1
Proetidae	Kaskia_chesterensis	322.25	-11.82	-28.38	Locality35,FraileysShale,CaldwellCo.,KY	3190.7	3190.7
Proetidae	Griffithides_acanthiceps	335.85	-10.31	-0.2	Vis?	2355.05	2355.05
Proetidae	Paladin_mucronatus	340.5	-15.43	-39.46	USNM1339B.NearSamEidson'sStillhouse,9milesnortheastofFayetteville	1060.05	17625.1
Proetidae	Pudoproetus_fernglenensis	344.9	-14.16	-49.76	DeadMansBranch,AlamoCanyon,LakeValleyFormation,DonaAnaMember,Otero	16580.6	17625.1
Proetidae	Griffithidella_doris	351.75	-24.58	-47.24	ChappelLimestone(Generallocality)	99639.7	641564
Proetidae	Thigriffides_roundyi	351.75	-24.58	-47.24	ChappelLimestoneneartypesection	99639.7	641564
Proetidae	Carbonocoryphe_planucauda	351.75	-24.58	-47.24	ChappelLimestoneTypeSection	99639.7	641564
Proetidae	Griffithidella_alternata	351.75	-24.58	-47.24	ChappelLimestoneTypeSection	99639.7	641564
Proetidae	Paladin_arduennensis	353	-13.92	4.95	Petitecarri?reaubordduHoyoux,Petit-Modaves?dl.vonHuy	323.42	641564
Proetidae	Piltonia_kuehnei	353	-22.03	3.81	1.450mSSEofCerrodePerna,5kmSEofAliseda	29109.3	641564
Proetidae	Bollandia_frechi	353	-9.01	17.09	Altwasser	19012.2	641564
Proetidae	Phillipsia_gemmulifera	353	-14.15	4.77	Anseremme,S-Belgium	11168.1	641564
Proetidae	Phillipsia_kellyi	353	-14.15	4.77	Anseremme,S-Belgium	163.026	641564
Proetidae	Liobolina_submonstrans	353	-11.31	7.18	BadGrund,quarryandslopeattheIberg-Winterberg	91095.1	641564
Proetidae	Panibole_nitida	353	-11.31	7.18	BadGrund,quarryandslopeattheIberg-Winterberg	87221.9	641564
Proetidae	Waribole_winterbergensis	353	-11.31	7.18	BadGrund,quarryandslopeattheIberg-Winterberg	19598.3	641564
Proetidae	Phillipsia_ornata	353	-14.08	4.1	Carri?redoClypot,Neufville-lez-Soignies,Belgium,Tn3c	2180.62	641564
Proetidae	Liobole_glabroides	353	-19.77	18.64	CimadiPlotta,nearpassodiM.CroceCarnico,CarnicAlpes,N-Italy	112611	641564
Proetidae	Liobole_subaequalis	353	-19.77	18.64	CimadiPlotta,nearpassodiM.CroceCarnico,CarnicAlpes,N-Italy	26991	641564
Proetidae	Waribole_aello	353	-19.77	18.64	CimadiPlotta,nearpassodiM.CroceCarnico,CarnicAlpes,N-Italy	23096.7	641564
Proetidae	Griffithides_acanthiceps	353	-12.03	-0.65	Cracoe,Yorkshire	708.705	641564
Proetidae	Diacoryphe_schoenlaubi	353	-19.56	19.69	Gr?neSchneid,KarnischeAlpen,bed1	142258	641564
Proetidae	Diacoryphe_pfeifferi	353	-19.61	19.74	KronhofGraben,CarnicAlpes,9kmeastofthePl?ckenpass	154897	641564
Proetidae	Cyrtoproetus_cracoensis	353	-9.06	16.1	LiebsteinbeiErdbach,RaumHerborn,Hessen	35268.9	641564
Proetidae	Semiproetus_drewerensis	353	-10.21	18.13	Mokravillage	914.573	641564
Proetidae	Comptonaspis_swallowi	357.25	-22.06	-52.16	AlamoPeak,Alamogordo,CaballeroFormation,Otero	1.13856	641564
Proetidae	Belgibole_abruptirhachis	362.7	-21.31	22.2	GrueneSchneidBed6(praesulcataZone)(6a,6b1,6b2,6c)	25861	191860
Proetidae	Typhloproetus_korni	362.7	-21.31	22.2	GrueneSchneidBed6(praesulcataZone)(6a,6b1,6b2,6c)	1863.63	191860
Proetidae	Helioproetus_subcarintiacus	362.7	-21.63	22.09	Gr?neSchneid,KarnischeAlpen,bed15	163590	191860
Proetidae	Proetus_missouriensis	362.7	-27.02	-38.39	USGSLoc.1009	796.17	191860
Proetidae	Dechenella_verneuili	385.9	6.02	2.86	ChernayaBayHorizon,platformfacies,SWNovayaZemlya	17314.1	50926.6
Proetidae	Proetus_crassimarginatus	387.8	-39.9	-34.38	BeechwoodLimestoneFanuafromSpeed,Indiana	31688.6	50926.6
Proetidae	Unguliproetus_unguloides	390	-47.12	20.07	LowerStyliolineMarlatGaraMdouard	1901.61	50926.6
Proetidae	Eremiproetus_dufresnoyi	395.3	-49.8	23.29	CrinoidalLimestoneLensesinMarl,Emsian/EifelianBoundary,HamarLaghdad	1338.09	1338.09
Proetidae	Ormistoniella_malaca	400.5	-58.21	-155.95	GydoFormation(1stShale),CockscombMts	511.372	511.372
Proetidae	Gerastos_glandiferus	410.7	-41.02	49.86	CorereefscutelluidassemblageofthePragian(Barrandian,Cze)Assemblage4a	48.706	41346600
Proetidae	Warburgella_rugulosa	414.15	-18.61	10.13	AcastellahebertiCommunity,Khudykovtsysuite,Podolia	17200000	41346600
Proetidae	Proetus_affinis	414.15	-45.07	52.39	Coniproetus-DecoroscutellumAssemblageoftheLochkovian(BarrandianCze)Assem3	12.6147	41346600
Proetidae	Warburgella_rugosa	414.15	-45.34	52.94	KotysLimestoneoftheLochkovFm,Lockovian(CZE)	105.432	41346600
Proetidae	Proetus_scalicus	417.35	-18.58	7.3	CalymenednestrovianaCommunity,Zvenigorodsuite,Podolia	697.812	41346600
Proetidae	Proetus_conspersus	417.35	-45.27	58.94	Mesodouvillina-QuadrifariusCommunityintheHolyCrossMountains	25700000	41346600
Proetidae	Decoroproetus_decorus	420.8	-69.08	22.93	Trilobiten-Bank,RTVI/6&RTVII/3,Rabat-TifletArea,Morocco	456782	1235010
Proetidae	Decoroproetus_miser	422.1	-53.62	57.34	Encrinuraspisbeaumonti-SmoothAtrypidCommunity,PragueBasin	11409.9	1235010
Proetidae	Proetus_handwerki	423.45	-26.38	-54.49	TrilobitesoftheSthenarocalymenecelebraAssoc.,Grafton,Illinois	15350.9	1235010
Proetidae	Proetus_concinnus	424.55	-28.39	-12.87	Proetusconcinnus-WarburgellastokesiiAssemblage,MuchWenlockLimestone	769939	1235010
Proetidae	Proetus_stokesi	425.55	-27.6	-43.15	SodusCreekatGlenmark-Rochester/LockportTransition	246.983	1235010
Proetidae	Decoroproetus_parviusculus	450.75	-27.33	-61.63	02-HSL-6C	13122.8	13122.8
Productida	Spinomarginifera_alpha	251.8	18.19	101.8	Huangzhishansection,Bed11,Huzhoucity	328684	33650000
Productida	Tethyochonetes_chaoi	251.8	18.19	101.8	Huangzhishansection,Bed29(new),Huzhoucity	311290	33650000
Productida	Spinomarginifera_chengyaoyenensis	251.8	18.19	101.8	Huangzhishansection,Bed11,Huzhoucity	650172	33650000
Productida	Chianella_chianensis	251.8	18.19	101.8	Huangzhishansection,Bed30(new),Huzhoucity	562100	33650000
Productida	Neochonetes_cursothornia	251.8	13.71	98.67	Guanyinshansection,lowerDayeFormation,PuqiCounty	140525	33650000
Productida	Haydenella_kiangsiensis	251.8	18.19	101.8	Huangzhishansection,Bed11,Huzhoucity	21200000	33650000
Productida	Spinomarginifera_kueichowensis	251.8	18.19	101.8	Huangzhishansection,Bed11,Huzhoucity	1166760	33650000
Productida	Tethyochonetes_liaoi	251.8	18.19	101.8	Huangzhishansection,Bed29(new),Huzhoucity	1390690	33650000
Productida	Tethyochonetes_longtanensis	251.8	18.19	101.8	Huangzhishansection,Bed11,Huzhoucity	90317.7	33650000
Productida	Fusichonetes_nayongensis	251.8	17.38	102.31	Baoqing,basalYinkengFm,ChangxingCounty	627740	33650000
Productida	Paryphella_orbicularis	251.8	18.19	101.8	Huangzhishansection,Bed11,Huzhoucity	732198	33650000
Productida	Tethyochonetes_pigmaea	251.8	11.89	104.03	Fushi,Acs47,YongdingCounty	681772	33650000
Productida	Tethyochonetes_quadrata	251.8	18.19	101.8	Huangzhishansection,Bed11,Huzhoucity	1316920	33650000
Productida	Paryphella_sinuata	251.8	18.65	100.97	MeishanSection,lowerYinkengFormation,ChangxingCounty	654915	33650000
Productida	Tethyochonetes_soochowensis	251.8	18.19	101.8	Huangzhishansection,Bed11,Huzhoucity	1066510	33650000
Productida	Paryphella_sparsiplicata	251.8	17.38	102.31	Baoqing,basalYinkengFm,ChangxingCounty	62367.1	33650000
Productida	Neochonetes_substrophomenoides	251.8	18.19	101.8	Huangzhishansection,Bed11,Huzhoucity	1699190	33650000
Productida	Paryphella_transversa	251.8	18.48	100.26	Hushan,Act710,NanjingCity	493524	33650000
Productida	Paryphella_triquetra	251.8	18.19	101.8	Huangzhishansection,Bed11,Huzhoucity	24443.3	33650000
Productida	Paryphella_undata	251.8	18.78	100.58	LongtanSectionACT916,NanjingCity	13216.9	33650000
Productida	Neochonetes_zhongyingensis	251.8	18.19	101.8	Huangzhishansection,Bed11,Huzhoucity	285216	33650000
Productida	Linoproductus_lineatus	252.65	-42.2	60.02	GuryulRavineKhunamuhFormation,E1,Bed49	671880	33650000
Productida	Contraspina_purdoni	252.65	-42.2	60.02	GuryulRavineKhunamuhFormation,E1,Bed49	221383	33650000
Productida	Waagenoconcha_abichi	253.15	-41.31	56.44	WestofKhura,UpperProductus-limestone,SaltRange	514567	33650000
Productida	Oldhamina_anshunensis	253.15	-12.75	81.17	Shizishan,ADL703,LuoguLake	1931640	33650000
Productida	Lazarevonia_arcuata	253.15	-50.24	61.79	W1389,Section22,PijaVillage,Karnali	7570.84	33650000
Productida	Labaella_bajarunassi	253.15	-14.1	55.45	UrushtenTract,P2bhorizon,NWCaucasus	44.7915	33650000
Productida	Parapygmochonetes_baoqingensis	253.15	5.19	96.25	Shaiwa,Unit4,Beds7-9	108019	33650000
Productida	Lissochonetes_bipartita	253.15	-42.2	60.02	Spur3kmNorthofBarusUnite	89266.7	33650000
Productida	Fanichonetes_campigia	253.15	17.28	101.87	Huangzhishansection,undivChangxingFm,XuzhouCity	231623	33650000
Productida	Leptodus_cancriniformis	253.15	9.17	100.79	Dapaichong,Huatang,ChenxianCounty	132334	33650000
Productida	Richthofenia_caucasica	253.15	-6.92	57.46	Kur-Istik1,UpperTakhtabulakFm	593.359	33650000
Productida	Cathaysia_chonetoides	253.15	17.34	101.82	MeishansectionBed26	1862640	33650000
Productida	Spinomarginifera_ciliata	253.15	-1.05	45.37	Amolsection,Beds26-29,lowerHerazValley	49512.4	33650000
Productida	Compressoproductus_compressus	253.15	8.33	93.94	BeifengjingSection,Bed12,ZhongliangHill	226190	33650000
Productida	Linoproductus_cora	253.15	-14.25	55.67	NikitinaBalka,2.5kmfrommouth,P2ahorizon,northCaucasus	11.1285	33650000
Productida	Costatumulus_crassicostatina	253.15	-50.28	61.85	W1208,KarnaliUnspecified	442.638	33650000
Productida	Comuquia_curvirostris	253.15	19.34	43.83	RaskolCliff,NWCaucasus	28812.7	33650000
Productida	Oldhamina_decipiens	253.15	-40.69	55.55	Bilot,UpperProductus-limestone,KhisorRange	1585090	33650000
Productida	Leptodus_deminutus	253.15	17.28	101.87	Huangzhishansection,Bed10,Huzhoucity	485017	33650000
Productida	Caucasoproductus_dichotomocostatus	253.15	-14.1	55.45	UrushtenRavine,LowerUrushtenFormation,UrushtenRiver,NWCaucasus	3464960	33650000
Productida	Haydenella_dutkevitchi	253.15	-6.92	57.46	Kur-Istik1,UpperTakhtabulakFm	593.359	33650000
Productida	Haydenella_elongata	253.15	8.33	93.94	BeifengjingSection,Bed10,ZhongliangHill	10231.4	33650000
Productida	Tethyochonetes_flatus	253.15	9.08	93.77	Chuanmusection,Bed178a,HuayingMountains	63494.6	33650000
Productida	Anidanthus_fusiformis	253.15	-50.28	61.85	W1214,KarnaliUnspecified	12281.2	33650000
Productida	Haydenella_gefoensis	253.15	-14.1	55.45	UrushtenTract,P2bhorizon,NWCaucasus	6.6508	33650000
Productida	Wyndhamia_gijigensis	253.15	72.85	33.19	TirekhtyakhRiver,T.302/1,MenkyuleRiverBasin,SouthernVerkhoyan	5386.84	33650000
Productida	Cancrinella_grandauris	253.15	-50.24	61.79	W1389,Section22,PijaVillage,Karnali	1093.24	33650000
Productida	Biplatyconcha_grandis	253.15	-50.28	61.85	W1269,KarnaliUnspecified	16622.9	33650000
Productida	Oldhamina_grandis	253.15	8.33	93.94	BeifengjingSection,Bed10,ZhongliangHill	21081.2	33650000
Productida	Transennatia_gratiosa	253.15	10.44	91.55	ChaotianSection,DalongFormation,UpperMudstone	11800000	33650000
Productida	Richthofenia_guangdeensis	253.15	8.33	93.94	BeifengjingSection,Bed26,ZhongliangHill	83641.1	33650000
Productida	Keyserlingina_guizhouensis	253.15	11.01	104.16	Fushi,DalongFm,YongdingCounty	130821	33650000
Productida	Spinomarginifera_helica	253.15	-21.72	50.32	AbadehSection,Unit7,SectionC,HambastMts	1791500	33650000
Productida	Costiferina_indica	253.15	-52.89	64.04	NaxingSectionJSB4,NyalamCounty	29056	33650000
Productida	Spinomarginifera_intercedens	253.15	8.33	93.94	BeifengjingSection,Bed14,ZhongliangHill	5592.32	33650000
Productida	Spinomarginifera_iranica	253.15	-1.51	44.68	ElikahRiversectionIR170,Alborzmountains	2421.55	33650000
Productida	Lamnimargus_japonicus	253.15	32.17	111.25	KP7,Nomaru,Kawahigashi,Oe-cho,KyotoPrefecture	312.834	33650000
Productida	Spinomarginifera_jiaozishanensis	253.15	6.72	94.18	ChuanyanSection,Bed9,Xingwen	35289.1	33650000
Productida	Echinauriella_jisuensiformis	253.15	-6.92	57.46	Kur-Istik1,UpperTakhtabulakFm	2183.82	33650000
Productida	Marginalosia_kalikotei	253.15	-50.28	61.85	W1202,KarnaliUnspecified	16137.3	33650000
Productida	Coolkilella_khangsarensis	253.15	-51.37	61.96	PP3,Peak17315,Marsyangdi,Manangarea	46.2843	33650000
Productida	Spinomarginifera_labaensis	253.15	-14.23	55.67	KamennayaRavine,60-70maboveMalayaLaba,northCaucasus	3.88031	33650000
Productida	Saeptathaerus_latus	253.15	-50.07	61.85	W1275,Section13,Popagaon,Karnali	3332.31	33650000
Productida	Nikitinia_licharewi	253.15	19.34	43.83	RaskolCliff,NWCaucasus	15915.9	33650000
Productida	Spinomarginifera_lopingensiformis	253.15	-14.23	55.67	KamennayaRavine,45maboveMalayaLaba,northCaucasus	2.85657	33650000
Productida	Spinomarginifera_lopingensis	253.15	9.08	93.77	Chuanmusection,Bed178a,HuayingMountains	1232540	33650000
Productida	Neochonetes_matsushitai	253.15	32.16	111.27	KP11,Miyanooku,Takeuchi,Nishisaka,Monobe-cho,AyabeCity	22.1212	33650000
Productida	Haydenella_minuta	253.15	-1.32	39.32	DorashamII-3,Bed9	1135040	33650000
Productida	Compressoproductus_mongolicus	253.15	8.33	93.94	BeifengjingSection,Bed12,ZhongliangHill	13200000	33650000
Productida	Lissochonetes_morahensis	253.15	32.18	111.25	KP5,Katsuradani,Kawahigashi,Oe-cho,KyotoPrefecture	88527.3	33650000
Productida	Marginifera_morrisi	253.15	-14.1	55.45	UrushtenTract,P2bhorizon,NWCaucasus	63168.4	33650000
Productida	Anidanthus_mucronata	253.15	3.51	99.47	DongpanSectionBed9-1/9-2,FusuiCounty	165899	33650000
Productida	Strophalosiina_multicostata	253.15	-6.92	57.46	Kur-Istik1,UpperTakhtabulakFm	1309.22	33650000
Productida	Chonetella_nasuta	253.15	-40.55	55.35	USNM9049,TapanWahan,southernKhisorRange	10200000	33650000
Productida	Haydenella_nasuta	253.15	8.33	93.94	BeifengjingSection,Bed10,ZhongliangHill	170.558	33650000
Productida	Paryphella_nasuta	253.15	6.57	96.35	WenjiangsiSection,Bed56,GuidingCounty	160580	33650000
Productida	Megasteges_nepalensis	253.15	-50.28	61.85	W1208,KarnaliUnspecified	1730.52	33650000
Productida	Strophalosia_netschajewi	253.15	-14.24	55.68	NikitinaBalka,1kmfrommouth,northCaucasus	3.2857	33650000
Productida	Rugaria_nisalensis	253.15	-50.28	61.85	W1208,KarnaliUnspecified	91.3603	33650000
Productida	Chenxianoproductus_nitens	253.15	8.33	93.94	BeifengjingSection,Bed26,ZhongliangHill	74999.6	33650000
Productida	Leptodus_nobilis	253.15	17.28	101.87	Huangzhishansection,Bed10,Huzhoucity	16100000	33650000
Productida	Echinauris_opuntia	253.15	-52.54	63.88	SelongXishan,Bed8	451004	33650000
Productida	Marginifera_ornata	253.15	-41.08	56.34	Amb,veryhighestbedsofProductus-limestone,SaltRange	3139.11	33650000
Productida	Cathaysia_parvulia	253.15	8.33	93.94	BeifengjingSection,Bed14,ZhongliangHill	260457	33650000
Productida	Echinalosia_perforata	253.15	-51.37	61.96	PP3,Peak17315,Marsyangdi,Manangarea	136.076	33650000
Productida	Urushtenia_permica	253.15	-14.24	55.68	NikitinaBalka,1kmfrommouth,northCaucasus	463.286	33650000
Productida	Marginalosia_planata	253.15	-76.48	157.67	StephensFormation,	17764.3	33650000
Productida	Costatumulus_polliciformis	253.15	-50.28	61.85	W1243,KarnaliUnspecified	3760.56	33650000
Productida	Edriosteges_poyangensis	253.15	8.33	93.94	BeifengjingSection,Bed26,ZhongliangHill	29413.8	33650000
Productida	Pectenoproductus_proprius	253.15	-14.24	55.68	NikitinaBalka,1kmfrommouth,northCaucasus	29154.6	33650000
Productida	Tschernyschewia_pseudoirginae	253.15	5.62	95.64	JiaozishanSectionBed25(AJ-43),AnshunCounty	23996.4	33650000
Productida	Spinomarginifera_pseudosintanensis	253.15	8.33	93.94	BeifengjingSection,Bed8,ZhongliangHill	765633	33650000
Productida	Spinomarginifera_pygmaea	253.15	-0.85	38.99	Ogbin,AliBashiFm,DzhagraRiver	38349.7	33650000
Productida	Haydenella_qinglongensis	253.15	8.33	93.94	BeifengjingSection,Bed9,ZhongliangHill	8881.92	33650000
Productida	Leptodus_richthofeni	253.15	8.33	93.94	BeifengjingSection,Bed26,ZhongliangHill	69407.5	33650000
Productida	Tyloplecta_rossica	253.15	-14.26	55.62	SevernayaBalka,1kmfrommouth,P2ahorizon,northCaucasus	43.3113	33650000
Productida	Marginifera_sexcostata	253.15	-6.54	57.21	Shor-Bulak,UpperTakhtabulakFm,TabulateBioherm	2532.99	33650000
Productida	Tethyochonetes_sheni	253.15	11.01	104.16	Fushi,DalongFm,YongdingCounty	3988.4	33650000
Productida	Tschernyschewia_sinensis	253.15	8.33	93.94	BeifengjingSection,Bed14,ZhongliangHill	186239	33650000
Productida	Anidanthus_sinosus	253.15	8.33	93.94	BeifengjingSection,Bed26,ZhongliangHill	10800000	33650000
Productida	Spinomarginifera_spinosocostata	253.15	-1.51	44.68	ElikahRiversectionIR166,Alborzmountains	49512.4	33650000
Productida	Oldhamina_squamosa	253.15	-14.92	87.93	HuaiThakFormation	2022060	33650000
Productida	Neochonetes_strophomenoides	253.15	11.01	104.16	Fushi,DalongFm,YongdingCounty	179532	33650000
Productida	Costiferina_subcostata	253.15	-41.31	56.44	KhundGhat,UpperProductus-limestone,SaltRange(Wynnecoll)	53.2708	33650000
Productida	Cathaysia_subpusilla	253.15	-14.23	55.67	KamennayaRavine,45maboveMalayaLaba,northCaucasus	3.37994	33650000
Productida	Licharewiconcha_subsinuatus	253.15	-13.97	55.57	GefoMountain,northCaucasus	6.17286	33650000
Productida	Oldhamina_subsquamosa	253.15	5.13	95.08	ZhongyingSectionBed31(QZ-15,14),QinglongCounty	26605.5	33650000
Productida	Spinomarginifera_sulcata	253.15	8.33	93.94	BeifengjingSection,Bed26,ZhongliangHill	653197	33650000
Productida	Leptodus_tenuis	253.15	-15.44	88.33	DoiPhaPhlung,BasalShales,LampangProvince	2623850	33650000
Productida	Fusiproductus_transversa	253.15	17.73	101.04	Meishan,ChangxingFormation,ChangxingCounty	4050.07	33650000
Productida	Linoproductus_triangularis	253.15	-14.25	55.67	NikitinaBalka,2.5kmfrommouth,P2ahorizon,northCaucasus	11.1285	33650000
Productida	Tschernyschewia_typica	253.15	8.33	93.94	BeifengjingSection,Bed20,ZhongliangHill	6091710	33650000
Productida	Tethysiella_urushtensis	253.15	19.34	43.83	RaskolCliff,NWCaucasus	27071.6	33650000
Productida	Haydenella_wenganensis	253.15	8.33	93.94	BeifengjingSection,Bed8,ZhongliangHill	8881.92	33650000
Productida	Tethyochonetes_wongiana	253.15	17.34	101.82	MeishansectionBed26	673965	33650000
Productida	Scacchinella_yakowlewi	253.15	-14.24	55.68	NikitinaBalka,1kmfrommouth,northCaucasus	28990.6	33650000
Productida	Tyloplecta_yangtzeensis	253.15	8.33	93.94	BeifengjingSection,Bed26,ZhongliangHill	467045	33650000
Productida	Cathaysia_yongdingensis	253.15	8.33	93.94	BeifengjingSection,Bed20,ZhongliangHill	501302	33650000
Productida	Waagenoconcha_abichi	255.65	5.4	101.76	LianxianCounty,UpperPermian	18100000	64000000
Productida	Waagenites_aequicosta	255.65	-41.93	56.17	NofKalabagh,SaltRange	412.584	64000000
Productida	Oldhamina_anshunensis	255.65	5.26	95.84	Meitangou,undividedLopingian,Anchang,ZhangyangCounty	389616	64000000
Productida	Costiferina_arata	255.65	-42.6	55.94	NEofSathra,SaltRange	1740.3	64000000
Productida	Cathaysia_chonetoides	255.65	14.43	101.94	Bed7,MeishanCSection,ChangxingLimestone,Zhejiang	17500000	64000000
Productida	Spinomarginifera_ciliata	255.65	-3.16	45.27	UpperNurValley,CentralElburzMountains	622535	64000000
Productida	Compressoproductus_compressus	255.65	-42.66	55.98	Khond,SaltRange(Flemingcoll)	4739860	64000000
Productida	Linoproductus_cora	255.65	-42.56	55.91	SEofWargal,SaltRange	12000000	64000000
Productida	Waagenoconcha_cylindricus	255.65	-42.61	55.89	SWofKutteMar,NofJabbi,SaltRange	898.542	64000000
Productida	Oldhamina_decipiens	255.65	-42.62	56.1	JustW.ofKhura,K29.108-119,187-199,SaltRange	10400000	64000000
Productida	Waagenites_dichotoma	255.65	-42.62	56.1	JustW.ofKhura,K28.809-816,SaltRange	5430.54	64000000
Productida	Tschernyschewia_fugax	255.65	-42.56	55.91	SEofWargal,SaltRange	6430.61	64000000
Productida	Waagenoconcha_gangetica	255.65	-48.72	60.05	NitiPass(UpperPermian)	14077.7	64000000
Productida	Waagenites_grandicosta	255.65	-42.51	55.91	WNWofSirra,SaltRange	3506.12	64000000
Productida	Oldhamina_grandis	255.65	5.4	101.76	LianxianCounty,UpperPermian	658.441	64000000
Productida	Transennatia_gratiosa	255.65	11.55	102.14	MingshanCoalfield,LopingArea	44100000	64000000
Productida	Spinomarginifera_helica	255.65	-3.16	45.27	UpperNurValley,CentralElburzMountains	18200000	64000000
Productida	Horridonia_horrida	255.65	16.05	22.38	R?merstein,Harz	203610	64000000
Productida	Waagenoconcha_humboldti	255.65	-42.62	56.1	JustW.ofKhura,K29.108-119,187-199,SaltRange	561671	64000000
Productida	Costiferina_indica	255.65	-42.64	56.03	HilljustsouthofKathwaiRestHouse,SaltRange	402099	64000000
Productida	Echinalosia_indica	255.65	-42.62	55.87	SlopesaboveJabbivillage,SaltRange	3312.65	64000000
Productida	Waagenoconcha_irginae	255.65	-42.64	56.03	HilljustsouthofKathwaiRestHouse,SaltRange	951.742	64000000
Productida	Striatospica_kayseri	255.65	11.55	102.14	MingshanCoalfield,LopingArea	2249680	64000000
Productida	Haydenella_kiangsiensis	255.65	-42.6	55.94	JustNWofSathra,K28.625-642,SaltRange	38800000	64000000
Productida	Richthofenia_lawrenciana	255.65	2.48	26.92	Zazar,Zazarfacies,centralSlovenia	20800000	64000000
Productida	Tethyochonetes_liaoi	255.65	5.36	85.96	DeerniMountain69III-W-H05,MaqenCounty	1565820	64000000
Productida	Linoproductus_lineatus	255.65	-42.64	56.03	HilljustsouthofKathwaiRestHouse,SaltRange	31600000	64000000
Productida	Spinomarginifera_lopingensis	255.65	14.43	101.94	Bed7,MeishanCSection,ChangxingLimestone,Zhejiang	16200000	64000000
Productida	Compressoproductus_mongolicus	255.65	11.55	102.14	MingshanCoalfield,LopingArea	1900340	64000000
Productida	Lissochonetes_morahensis	255.65	-42.61	55.89	SWofKutteMar,NofJabbi,SaltRange	1654.44	64000000
Productida	Chonetella_nasuta	255.65	-42.62	55.87	SlopesaboveJabbivillage,SaltRange	25700000	64000000
Productida	Leptodus_nobilis	255.65	-3.22	45.21	Elikahside-valley,centralElburzMountains	45200000	64000000
Productida	Marginifera_ornata	255.65	-42.64	56.03	HilljustsouthofKathwaiRestHouse,SaltRange	179999	64000000
Productida	Edriosteges_poyangensis	255.65	11.55	102.14	MingshanCoalfield,LopingArea	2775420	64000000
Productida	Contraspina_purdoni	255.65	-42.31	55.84	Chederoo(Flemingcoll)	70132.4	64000000
Productida	Leptodus_richthofeni	255.65	7.71	96.1	EnshiCounty,UpperPermian	21300000	64000000
Productida	Waagenoconcha_serialis	255.65	-42.62	55.87	SlopesaboveJabbivillage,SaltRange	1027.88	64000000
Productida	Tschernyschewia_sinensis	255.65	11.55	102.14	MingshanCoalfield,LopingArea	364690	64000000
Productida	Spinomarginifera_spinosocostata	255.65	-3.16	45.27	UpperNurValley,CentralElburzMountains	8267820	64000000
Productida	Oldhamina_squamosa	255.65	1.47	95.87	PanxianCounty,westernpart,undividedLopingian	19017.6	64000000
Productida	Costiferina_subcostata	255.65	-42.64	56.03	HilljustsouthofKathwaiRestHouse,SaltRange	4214.8	64000000
Productida	Spinomarginifera_sulcata	255.65	-37.38	60.78	ShirinabadIR662,Alborzmountains	782064	64000000
Productida	Leptodus_tenuis	255.65	1.47	95.87	PanxianCounty,westernpart,undividedLopingian	12700000	64000000
Productida	Marginifera_typica	255.65	-42.62	55.87	RightsideofJabbigorge,K28.493-495,Nofpt976,SaltRange	27800000	64000000
Productida	Tschernyschewia_typica	255.65	-42.56	55.91	SEofWargal,SaltRange	13600000	64000000
Productida	Waagenoconcha_vagans	255.65	-42.19	56	Pt2042,EofBuriKhel,SaltRange	1366.9	64000000
Productida	Tschernyschewia_vicinalis	255.65	-42.62	56.1	JustW.ofKhura,K29.108-119,187-199,SaltRange	1373.51	64000000
Productida	Tethyochonetes_wongiana	255.65	5.4	101.76	LianxianCounty,UpperPermian	414049	64000000
Productida	Tyloplecta_yangtzeensis	255.65	-3.16	45.27	UpperNurValley,CentralElburzMountains	22800000	64000000
Productida	Costiferina_alata	256.5	-53.4	60.55	W1337,Section18,NangungKhola,Karnali	527264	64000000
Productida	Spinomarginifera_alpha	256.5	-22.09	67.67	ZhongbeiBlock,LhazeCounty	1097260	64000000
Productida	Collemataria_armenica	256.5	-2.44	39.16	Vediriver,1.5kmbelowAksurivulet	141.315	64000000
Productida	Neochonetes_armenicus	256.5	-2.64	39.7	Ogbin,AraxilevisBeds,DzhagraRiver	7855.65	64000000
Productida	Asperlinus_asperulus	256.5	-42.76	55.68	Chidru,CephalopodBed,SaltRange	16600000	64000000
Productida	Costatumulus_bolchovitinovae	256.5	31.38	15.03	Carbondal,LK622,WollastonForeland	3684.92	64000000
Productida	Capillonia_brevisulcus	256.5	-76.27	-178.58	GS5078,Arthurton(G45/f8612)	174128	64000000
Productida	Cancrinella_cancriniformis	256.5	1.94	98.33	Kuanshang,LocalityT230,Nantan-hsien	1397150	64000000
Productida	Spinomarginifera_chengyaoyenensis	256.5	2.5	96.46	Yach'ihho,LocalityT73d,Ch'ienhsi-hsien	9393.17	64000000
Productida	Urushtenoidea_crenulata	256.5	26.16	106.26	MZ-S2,Tsuzumugi,MizukoshiValley	6941170	64000000
Productida	Cancrinelloides_curvatus	256.5	41.9	12.75	Festningen,Unit8,Spitsbergen(1984coll)	5680230	64000000
Productida	Anemonaria_delicatula	256.5	31.26	14.9	Forposten,Avantpostbjerg,Clavering?	562406	64000000
Productida	Leptodus_deminutus	256.5	35.69	110.61	NakhodkaReef,lowerquarry	500088	64000000
Productida	Sarytchevinella_djulfensis	256.5	-2.68	39.48	Baisal,Bed33	191327	64000000
Productida	Leptodus_elongatus	256.5	8.47	101.21	QibaoshanSection,ShanggaoCounty	220.807	64000000
Productida	Tschernyschewia_geniculata	256.5	4.4	102	Sankoujiang,LianxianArea,WangpanliFm	1090220	64000000
Productida	Costatumulus_germanicus	256.5	31.12	14.92	Fiskeelv,Martiniakalk,SouthernClavering?	372.339	64000000
Productida	Liosotella_grandicosta	256.5	28.56	15.24	Kollen,Save-Soderberghcollection,eastside,NathorstsFjord	599777	64000000
Productida	Biplatyconcha_grandis	256.5	-55.51	64.09	Shengmi,MountQomolangmaregion	16349.9	64000000
Productida	Yakovlevia_greenlandica	256.5	31.23	14.6	Djaevlekloften,Clavering?	3187320	64000000
Productida	Keyserlingina_guizhouensis	256.5	1.52	96.26	AgongSectionAP24,ZhijinCounty	21.0368	64000000
Productida	Lamnimargus_himalayensis	256.5	-52.68	61.7	W1333,Section18,NangungKhola,Karnali(NangungFm)	39337.9	64000000
Productida	Gubleria_huangi	256.5	1.66	96.52	BulangSectionBM10,PudingCounty	158750	64000000
Productida	Neoplicatifera_huangi	256.5	4.99	101.48	YanshaSection,JiaheArea	1803.3	64000000
Productida	Waagenoconcha_imperfecta	256.5	-50.26	104.21	BMRKLB11,MountHardman	2952810	64000000
Productida	Araxilevis_intermedius	256.5	-23.3	50.37	HambastMountains,Section6,Unit6	576106	64000000
Productida	Spinomarginifera_iranica	256.5	-3.7	45.37	BearGullysectionIR862,Alborzmountains	224318	64000000
Productida	Spinomarginifera_janus	256.5	3.28	96.39	Shihtzup'uT39(Wuchiapingian),Tsunyi-hsien	1328340	64000000
Productida	Yakovlevia_kaluzinensis	256.5	26.16	106.26	MZ-S2,Tsuzumugi,MizukoshiValley	532097	64000000
Productida	Spinomarginifera_kueichowensis	256.5	-20.84	105.89	JengkaPassM40A	1288720	64000000
Productida	Krotovia_licharewi	256.5	31.12	14.92	Fiskeelv,Martiniakalk,SouthernClavering?	66.5591	64000000
Productida	Marginifera_magniplicata	256.5	1.64	96.65	JiaozishanSectionBed4(AJ-4,3,2),AnshunCounty	8796220	64000000
Productida	Transennatia_margaritatus	256.5	8.97	101.8	Dongshengling,FengchengCounty	105853	64000000
Productida	Bruntonia_maynci	256.5	31.27	14.59	Cirkusdal,NorthernClavering?	14563.6	64000000
Productida	Haydenella_minuta	256.5	-2.64	39.7	Ogbin,HaydenellaBeds,DzhagraRiver	188392	64000000
Productida	Strophalosia_morrisiana	256.5	17.46	14.6	ClaxheughRock,Sunderland	1683820	64000000
Productida	Echinauris_opuntia	256.5	-54.53	62.91	SelongXishan,middlebeds	13600000	64000000
Productida	Marginifera_ovalis	256.5	-42.75	55.67	Nearpt2263,K34.60-81,ESEofChhidru,SaltRange	19995.2	64000000
Productida	Reedosepta_parilis	256.5	-42.87	55.67	NNWofChittidilRestHouse,SaltRange	382.455	64000000
Productida	Waagenoconcha_payeri	256.5	31.38	15.03	Brachiopoddal,LK429,WollastonForeland	14005.7	64000000
Productida	Lamnimargus_peregrinus	256.5	35.69	110.61	NakhodkaReef,lowerquarry	171636	64000000
Productida	Kochiproductus_plexicostatus	256.5	41.9	12.75	Festningen,Unit11,Spitsbergen(1984coll)	49179.7	64000000
Productida	Mesolobus_plicatiformis	256.5	4.4	101.98	Yueguangshan,LongtanFormation,LianxianCounty	471424	64000000
Productida	Costatumulus_polliciformis	256.5	-55.51	63.72	Qubu,Bed9	5323.56	64000000
Productida	Ogbinia_productinaeformis	256.5	-2.32	39.75	Chanakhchi,HaydenellaBeds	54.3861	64000000
Productida	Anemonaria_pseudohorrida	256.5	43.12	13.59	CapeSelander,Sample323,Nordaustlandet	245735	64000000
Productida	Spinomarginifera_pseudosintanensis	256.5	6.99	100.48	Shitangpu,LukouTown,ZhuzhouCity	361169	64000000
Productida	Craspedalosia_pulchella	256.5	31.38	15.03	Brachiopoddal,LK410,WollastonForeland	669.544	64000000
Productida	Spinomarginifera_pygmaea	256.5	-23.3	50.37	HambastMountains,Section6,Unit6	444161	64000000
Productida	Taeniothaerus_qubuensis	256.5	-55.51	63.72	Qubu,Bed4	1688.01	64000000
Productida	Echinalosia_rarispina	256.5	-43.11	55.82	WestofKhura,baseofUpperProductus-limestone,SaltRange	2199.81	64000000
Productida	Saeptathaerus_reclinis	256.5	-47.67	112.82	PortKeatsregion,assemblageC	473475	64000000
Productida	Bruntonia_rudis	256.5	31.38	15.03	Carbondal,LK604,WollastonForeland	2963.73	64000000
Productida	Haydenella_salinaria	256.5	-43.14	55.98	NsideofLunwalaWahan,K29.44-57,58-74,N.ofNali,SaltRange	20435.6	64000000
Productida	Pleurohorridonia_scoresbyensis	256.5	31.27	14.59	Cirkusdal,NorthernClavering?	9714.71	64000000
Productida	Megasteges_septentrionalis	256.5	-47.67	112.82	PortKeatsregion,assemblageD	2311.25	64000000
Productida	Richthofenia_sinensis	256.5	13.78	101.62	Niutoushancoalmine7shaft,Act299,GuangdeCounty	1422660	64000000
Productida	Anidanthus_sinosus	256.5	6.86	97.86	Daluokeng,XiamidongMember2,Gaofeng,CiliCounty	9875070	64000000
Productida	Paryphella_sinuata	256.5	7.78	104.79	YanshiSection,CuipingshanFm,LongyanCounty	236.547	64000000
Productida	Tethyochonetes_soochowensis	256.5	1.81	96.32	Beimenyan,LongtanFm,Chengguan,ZhijinCounty	333908	64000000
Productida	Costiferina_spiralis	256.5	-44.01	59.45	ZewanLimestone:Bryozoaandassociations	14659.2	64000000
Productida	Anemonaria_spitzbergiana	256.5	31.26	14.9	Forposten,Avantpostbjerg,Clavering?	8769.94	64000000
Productida	Waagenites_squamulifera	256.5	-43.1	55.75	Jabi,CephalopodBed,SaltRange	14797.1	64000000
Productida	Neochonetes_strophomenoides	256.5	-55.51	64.09	Shengmi,MountQomolangmaregion	4673380	64000000
Productida	Neochonetes_substrophomenoides	256.5	1.52	96.26	AgongSectionAP22,ZhijinCounty	3075260	64000000
Productida	Lissochonetes_superba	256.5	40.87	13.87	Ahlstrandodden,Unit5(AP6),Svalbard	1091.28	64000000
Productida	Strophalosiina_tibetica	256.5	35.69	110.61	NakhodkaReef,lowerquarry	243863	64000000
Productida	Svalbardia_toulai	256.5	31.12	14.92	BrinkleyBjerg,Clavering?	7198.08	64000000
Productida	Permianella_typica	256.5	26.16	106.26	MZ-S2,Tsuzumugi,MizukoshiValley	2710480	64000000
Productida	Anidanthus_ussuricus	256.5	26.17	106.26	MZ-S1,Tsuzumugi,MizukoshiValley	263505	64000000
Productida	Anemonaria_vadosisinuata	256.5	31.27	14.59	Cirkusdal,NorthernClavering?	1362.29	64000000
Productida	Costiferina_vishnu	256.5	-43.11	55.82	Khund,MiddleProductus-limestone,SaltRange	31.9925	64000000
Productida	Aulosteges_wangenheimi	256.5	-48.09	60.07	Mayang81KFA71-7,ZandaCounty	6378.78	64000000
Productida	Haydenella_wenganensis	256.5	1.52	96.26	AgongSectionAP1,ZhijinCounty	2496.84	64000000
Productida	Kuvelousia_weyprechti	256.5	43.12	13.59	CapeSelander,Sample323,Nordaustlandet	6263.78	64000000
Productida	Retimarginifera_xizangensis	256.5	-55.51	63.72	Qubu,Bed6	661.93	64000000
Productida	Neochonetes_zhongyingensis	256.5	1.64	96.65	JiaozishanSectionBed16(AJ-35,34,33),AnshunCounty	637632	64000000
Productida	Chonostegoides_armenicus	262	-5.75	40.51	Baisal,Bed20	64.9906	64000000
Productida	Chonostegoides_baissalensis	262	-5.75	40.51	Baisal,Bed21	528.606	64000000
Productida	Terrakea_brachythaera	262	-73.85	-168.83	GS6071,LethamBurn(D44/f9622)	0.173289	64000000
Productida	Thamnosia_capitanensis	262	4.08	-33.32	AMNH401,RaderRidge,GuadalupeMountains	1852.96	64000000
Productida	Richthofenia_caucasica	262	-5.75	40.51	Baisal,Bed29	996.29	64000000
Productida	Urushtenoidea_chaoi	262	-25.23	108.78	SungaiBera(BF2),AssemblageA	312802	64000000
Productida	Sestropoma_cribriferum	262	4.22	-32.81	DarkCanyon,GuadalupeMountains,Sample35007	219.15	64000000
Productida	Acanthalosia_deari	262	-57.29	144.79	BMRB270a,ExmoorHomestead	3094	64000000
Productida	Ogbinia_dzhagrensis	262	-5.75	40.57	AvushGorge,KhachikGorizont	1998920	64000000
Productida	Marginifera_excavata	262	-44.94	55.22	USNM9179,MusaKhel,SaltRange	2957.78	64000000
Productida	Ctenalosia_fixata	262	15.37	-35.83	CherryCreekRangeCCR-30F	35859.4	64000000
Productida	Linoproductus_fujianensis	262	4.34	104.32	Jiafu,TongziyanFormation,Yong'anCounty	533.169	64000000
Productida	Echinalosia_glabra	262	-60.33	148.65	BMRBa320,Baralaba	2377.67	64000000
Productida	Pseudoleptodus_guadalupensis	262	4.12	-33.26	AMNH475,McKittrickCanyon,GuadalupeMountains	41.4736	64000000
Productida	Filiconcha_hillae	262	-60.33	148.65	BMRBa1,Baralaba	11196.2	64000000
Productida	Sphenosteges_hispidus	262	15.37	-35.83	CherryCreekRangeCCR-363	10484.6	64000000
Productida	Echinauriella_jisuensiformis	262	-25.29	50.32	Abadeh,Unit4,HambastMountains	23867.5	64000000
Productida	Spinomarginifera_jisuensis	262	30.96	110.02	BratMountain,ChandalazHorizon,PartizanskayaRiver,Primorye	5506180	64000000
Productida	Chonetinella_krotovi	262	24.02	114.73	G2-zawaValley,T7,Takakura-yamaMountain,IwakiCity	445.9	64000000
Productida	Kuvelousia_leptosa	262	15.37	-35.83	CherryCreekRangeCCR-464	15610.1	64000000
Productida	Magniplicatina_magniplica	262	-64.39	155.67	BMRTH403,DrakeSyncline	26284.9	64000000
Productida	Terrakea_multispinosa	262	-60.87	149.45	UQL4577,quarryalonghighwaynorthofTheodore,BowenBasin	2582.14	64000000
Productida	Yakovlevia_multistriata	262	15.37	-35.83	CherryCreekRangeCCR-600	10921.8	64000000
Productida	Tyloplecta_nankingensis	262	-14.85	106.4	PhnomSa,Kampot	273387	64000000
Productida	Bathymyonia_nevadensis	262	15.37	-35.83	CherryCreekRangeCCR-359	741243	64000000
Productida	Cancrinelloides_obrutschewi	262	54.28	31.53	BaikurRiver,Outcrop443,TaimyrPeninsula	2599070	64000000
Productida	Echinalosia_ovalis	262	-61.43	146.14	BMREd167,DryCreek,EarlyStormsHomestead	33047.6	64000000
Productida	Liosotella_popei	262	4.12	-33.26	AMNH475,McKittrickCanyon,GuadalupeMountains	2085.09	64000000
Productida	Vediproductus_punctatiformis	262	8.49	102.71	Lengwu,lowerCunhoulingMember,Tonglu	1774230	64000000
Productida	Terrakea_quadrata	262	-60.7	149.44	GSQD166,MountLittleUncleTom	770.422	64000000
Productida	Capillonia_semicircularis	262	-60.87	149.45	UQL4577,quarryalonghighwaynorthofTheodore,BowenBasin	9748.15	64000000
Productida	Monticulifera_sinensis	262	2.19	97.43	Rencunpingsection,bed15,RCF39,SangzhiCounty	186583	64000000
Productida	Paucispinauria_solida	262	-61.43	146.14	BMREd167,DryCreek,EarlyStormsHomestead	49263.9	64000000
Productida	Collemataria_spatulata	262	4.1	-33.25	AMNH347,McKittrickCanyonDraw,GuadalupeMountains	40068	64000000
Productida	Xenosteges_umbonatus	262	4.33	-33.12	USNM737a,BigCanyon,GuadalupeMountains	36.3755	64000000
Productida	Megousia_aagardi	263.5	35.26	103.37	Ke'erqinYouyiQianqi,Undivided	84462.5	74750000
Productida	Anidanthus_achengensis	263.5	33.43	107.74	AchengCounty	61.5062	74750000
Productida	Cancrinella_cancriniformis	263.5	34.57	109.32	Shenshu,southernmountain,TieliCounty	30700000	74750000
Productida	Urushtenoidea_crenulata	263.5	0.08	94.73	XikouSection,YuechiCounty	1326940	74750000
Productida	Marginifera_elongata	263.5	-19.83	75.92	Xiqiasaisuqu,Collection0155	1357910	74750000
Productida	Marginifera_excavata	263.5	-44.97	54.43	ScarpslopesNWofBilot,Trans-IndusRange	5828.09	74750000
Productida	Chonetinella_gibberulus	263.5	34.57	109.32	Shenshu,southernmountain,TieliCounty	978698	74750000
Productida	Calliprotonia_inexpectatum	263.5	27.95	-29.27	WinnifredPass,Section125,RockyMountains	7201.5	74750000
Productida	Haydenella_kiangsiensis	263.5	-19.79	75.81	GarizarenGZ4,GarizarenFormation	6734460	74750000
Productida	Cancrinella_koninckiana	263.5	35.3	103.45	Xiaosanjiazi,WujiatunFormation,Ke'erqinYouyiQianqi	2315740	74750000
Productida	Linoproductus_lineatus	263.5	25.74	105.83	Kaishantun	35700000	74750000
Productida	Spinomarginifera_lopingensis	263.5	-19.79	75.81	GarizarenGZ4,GarizarenFormation	73483.4	74750000
Productida	Gemmellaroia_marii	263.5	-6.87	18.09	MerbahelOussifSeries,DjebelTebaga	4709.06	74750000
Productida	Leptodus_nobilis	263.5	-6.87	18.09	MerbahelOussifSeries,DjebelTebaga	34500000	74750000
Productida	Vediproductus_punctatiformis	263.5	-3	97.9	Duobai,ZiyunCounty	2725330	74750000
Productida	Contraspina_purdoni	263.5	32.67	107.76	SanhetuanSection,Bed7,WuchangArea	101750	74750000
Productida	Marginifera_septentrionalis	263.5	35.3	109.73	CuiluanjianshanRiver,Yichun	5308680	74750000
Productida	Sicularia_sicula	263.5	-6.87	18.09	MerbahelOussifSeries,DjebelTebaga	4827.73	74750000
Productida	Monticulifera_sinensis	263.5	-19.83	75.92	Xiqiasaisuqu,Collection0155	837695	74750000
Productida	Costiferina_spiralis	263.5	-44.97	54.43	ScarpslopesNWofBilot,Trans-IndusRange	7402.75	74750000
Productida	Marginifera_transversa	263.5	-44.97	54.43	ScarpslopesNWofBilot,Trans-IndusRange	5920.43	74750000
Productida	Marginifera_typica	263.5	35.25	103.4	Jinjiadian,Undivided,Ke'erqinYouyiQianqi	3163630	74750000
Productida	Vediproductus_vediensis	263.5	35.62	104.25	ZhaganChulu,Undivided,BayanWulan,JalaidQi	18200000	74750000
Productida	Bilotina_yanagidai	263.5	-8.17	46.73	Rutehsectionlooseblock,ElburzMountains	2043150	74750000
Productida	Linoproductus_cora	265.75	35.58	103.98	JalaidQi,Undivided	25300000	74750000
Productida	Transennatia_gratiosa	265.75	35.58	103.98	JalaidQi,Undivided	9438630	74750000
Productida	Neoplicatifera_huangi	265.75	1.51	97.5	CiliCounty,MaokouFm	365565	74750000
Productida	Cyclacantharia_kingorum	265.75	3.04	-33.43	USGS2964,10milesNWofKent,DelawareMountains	5033.77	74750000
Productida	Urushtenoidea_maceus	265.75	-0.01	102.5	RenhuaCounty,MaokouFormation	119761	74750000
Productida	Magniplicatina_magniplica	265.75	-64.24	157.23	UQL3381,CrookedCreek(ThomsonLocality25)	128418	74750000
Productida	Edriosteges_medlicottianus	265.75	-3.82	92.33	Lihsukou,LocationTL36,T'angchiapa,Hanyuan-hsien	36160.3	74750000
Productida	Marginifera_morrisi	265.75	35.58	103.98	JalaidQi,Undivided	447.676	74750000
Productida	Tyloplecta_nankingensis	265.75	-2.29	95.45	Houtiangou,ZunyiCounty	380092	74750000
Productida	Bathymyonia_nevadensis	265.75	14.86	-36.36	SummitSpringPass(40thparallelexpedition)	2757420	74750000
Productida	Liosotella_opima	265.75	3.3	-33.49	USGS2957green,southernDelawareMountains	67.3691	74750000
Productida	Anemonaria_pseudohorrida	265.75	40.65	14.94	Festningen,Unit5,Spitsbergen(1984coll)	2546010	74750000
Productida	Scapharina_rugosa	265.75	3.32	-33.47	USGS2969green,southernDelawareMountains	166.687	74750000
Productida	Micraphelia_scitula	265.75	3.15	-33.61	USGS2936green,JonesRanch	430.853	74750000
Productida	Neoplicatifera_sintanensis	265.75	-0.01	102.5	QujiangCounty,MaokouFormation	173934	74750000
Productida	Echinauris_subhorrida	265.75	15.21	-36.08	HamiltonButte,RubyGroup	18767.3	74750000
Productida	Kuvelousia_weyprechti	265.75	40.65	14.94	KappStarostin(Festningen),Sample10	2.12348	74750000
Productida	Tornquistia_ambiensis	266.5	-46.27	55.21	Amb,ChonetesBed,SaltRange	19.0116	74750000
Productida	Leptodus_americana	266.5	1.65	-33.13	R.E.King192,GillilandCanyon,GlassMountains	3576.4	74750000
Productida	Linoproductus_antonioi	266.5	-36.84	52.65	HaushiUpliftOL12,Section5	187352	74750000
Productida	Neochonetes_arabicus	266.5	-36.6	52.73	HaushiUpliftOL1,Section1	452.218	74750000
Productida	Thamnosia_arctica	266.5	43.36	-27.15	USGS21760-PC,YukonRiver-NationRiverConfluence	4321150	74750000
Productida	Neochonetes_armenicus	266.5	-8.47	41.41	AvushGorge,GnishikGorizont	81205.4	74750000
Productida	Chonostegoides_armenicus	266.5	-8.48	41.34	BaisalMountain,WestSlope,GnishikFormation	876241	74750000
Productida	Paucispinifera_auriculata	266.5	1.63	-33.05	USNM704,WordFormation(AppelRanchMember),HessCanyon,GlassMountains	50.2378	74750000
Productida	Pseudostrophalosia_blakei	266.5	-57.06	146.14	BMRB261e,NeboSynclinorium	10624.4	74750000
Productida	Terrakea_brachythaera	266.5	-73.19	-165.77	GS7347,LethamBurn(D44/f9865)	3710710	74750000
Productida	Thamnosia_capitanensis	266.5	3.63	-33.48	AMNH398,LigonRanch,GuadalupeMountains	21.4635	74750000
Productida	Urushtenoidea_chaoi	266.5	7.67	100.73	DushanSection,KufengFm,GuangdeCounty	112763	74750000
Productida	Chianella_chianensis	266.5	0.51	96.57	Rencunpingsection,bed13,RCF35,SangzhiCounty	1307480	74750000
Productida	Cathaysia_chonetoides	266.5	1.97	100.96	Xiaojiangbiansection,Bed13,AnfuCounty	96667.5	74750000
Productida	Pseudostrophalosia_clarkei	266.5	-75.87	-178.54	V1032,BouldersinPariwhakaohoStream	540964	74750000
Productida	Compressoproductus_compressus	266.5	7.67	100.73	DushanSection,KufengFm,GuangdeCounty	159264	74750000
Productida	Dyoros_convexus	266.5	3.63	-33.59	AMNH519,GuadalupePass,GuadalupeMountains	4293.91	74750000
Productida	Compressoproductus_corniformis	266.5	34.14	99.35	Yuejincoalmine,Xiujimqinqi	1187.3	74750000
Productida	Costispinifera_costata	266.5	1.63	-33.05	USNM704,WordFormation(AppelRanchMember),HessCanyon,GlassMountains	70.7995	74750000
Productida	Grandaurispina_crassa	266.5	1.64	-33.05	USNM706d,HessCanyon,GlassMountains	1.76517	74750000
Productida	Pseudostrophalosia_crassa	266.5	-58.99	147.36	BMRCL50/1,CapellaBlock	109171	74750000
Productida	Sestropoma_cribriferum	266.5	3.63	-33.48	AMNH398,LigonRanch,GuadalupeMountains	8.77574	74750000
Productida	Cancrinelloides_curvatus	266.5	75.44	-2.39	KhivachRiver,GizhigaBasin,OmolonHorizon,OmolonMassif	78816.5	74750000
Productida	Pseudoavonia_cylindrica	266.5	31.65	79.11	GaerdangtanSection16F3628-1-2,Muli,TianjingCounty	8106050	74750000
Productida	Megousia_definita	266.5	3.63	-33.59	AMNH519,GuadalupePass,GuadalupeMountains	471.604	74750000
Productida	Thamnosia_depressa	266.5	15.18	-36.03	MedicineRangeMR-(-150)	143.133	74750000
Productida	Ogbinia_dzhagrensis	266.5	-8.47	41.41	AvushGorge,GnishikGorizont	27783	74750000
Productida	Marginifera_echinata	266.5	-46.1	55.21	USNM9180,MusaKhel,SaltRange	2066.64	74750000
Productida	Terrakea_elongata	266.5	-73.2	-165.79	GS3616,ProductusCreek,LethamBurn(D44/f9478)	530839	74750000
Productida	Collemataria_elongata	266.5	1.62	-33.03	USNM706z,WordFormation(ChinaTankMb.),OldWordRanch,GlassMountains	31.1497	74750000
Productida	Dyoros_extensus	266.5	1.64	-33.05	USNM706d,HessCanyon,GlassMountains	517.851	74750000
Productida	Ctenalosia_fixata	266.5	1.64	-33.05	USNM706b,HessCanyon,GlassMtns.	524.716	74750000
Productida	Grandaurispina_ghabaensis	266.5	-36.6	52.73	HaushiUpliftOL46,Section7	559.397	74750000
Productida	Grandaurispina_gibbosa	266.5	1.63	-33.06	USNM732c,HessCanyon,GlassMountains	0.10957	74750000
Productida	Pseudoleptodus_grandis	266.5	1.63	-33.05	USNM742b,HessCanyon,GlassMountains	2.40941	74750000
Productida	Echinosteges_guadalupensis	266.5	3.55	-33.54	USNM731,PinyonTank,GuadalupeMountains	8553.13	74750000
Productida	Pseudoleptodus_guadalupensis	266.5	3.55	-33.54	USNM731,PinyonTank,GuadalupeMountains	1097.35	74750000
Productida	Paucispinifera_guadalupensis	266.5	1.61	-33.02	R.E.King148,OldWordRanch,GlassMountains	7.58517	74750000
Productida	Spinomarginifera_helica	266.5	-10.33	47.33	MingunIV,(61)IA-V84,ElburzMountains	1116080	74750000
Productida	Heteralosia_hystricula	266.5	1.63	-33.05	USNM704,WordFormation(AppelRanchMember),HessCanyon,GlassMountains	50.2378	74750000
Productida	Cooperina_inexpectata	266.5	1.64	-33.05	USNM706b,HessCanyon,GlassMtns.	4264.96	74750000
Productida	Pseudostrophalosia_ingelarensis	266.5	-61.35	148.18	BMREd78,DryCreek,EarlyStormsHomestead	24547.7	74750000
Productida	Dyoros_intrepidus	266.5	3.64	-33.48	AMNH33,LigonRanch,GuadalupeMountains	22.3579	74750000
Productida	Liosotella_irregularis	266.5	1.64	-33.05	USNM706d,HessCanyon,GlassMountains	76.4819	74750000
Productida	Pygmochonetes_jingxianensis	266.5	8.08	99.56	LongtanSection,KufengFm,Longtan,NanjingCity	6705.53	74750000
Productida	Echinauriella_jisuensiformis	266.5	-8.47	41.41	AvushGorge,GnishikGorizont	27889.2	74750000
Productida	Spinomarginifera_jisuensis	266.5	31.01	90.51	JisuHonguer1190,EnteletesBed	10106.5	74750000
Productida	Dictyoclostoidea_kiangsiensis	266.5	7.67	100.73	DushanSection,KufengFm,GuangdeCounty	11623.1	74750000
[truncated: 2,371 more rows]
