# Supplementary material
Source: Frontiers journal article supplement (https://www.frontiersin.org/articles/310982)
Supplement: Table_S3a.XLSX [file Table_S3a.XLSX]

## Sheet: no_age_ext_linear
Linear_model	Parameter_value	Standard_error	z.value	p-value	clade			Quadratic_model	Parameter_value	Standard_error	z.value	p-value	clade			Polynomial_model	Parameter_value	Standard_error	z.value	p-value	clade
Intercept	3.42466	0.0982472	34.8576	3.26454e-266	Athyridida			Intercept	2.36538	0.0640298	36.9418	9.85525e-299	Athyridida			Intercept	2.56656	0.0863019	29.7393	2.38405e-194	Athyridida	+
SR	-0.0712362	0.00255125	-27.922	1.44133e-171	Athyridida			SR^2	-0.00098262	3.7878e-05	-25.9417	2.25522e-148	Athyridida			SR	-5.21433	0.199841	-26.0925	4.43805e-150	Athyridida	+
AIC	1437.27	-	-	-	Athyridida			AIC	1671.34	-	-	-	Athyridida			SR^2	3.30381	0.149255	22.1353	1.44409e-108	Athyridida	+
																AIC	755.068	-	-	-	Athyridida	+
Intercept	-3.83475	0.138509	-27.686	1.02929e-168	Auloporida			Intercept	-2.86496	0.0862844	-33.2037	9.52882e-242	Auloporida	+		Intercept	-325584725506449	802104	-4.05913e+08	0	Auloporida
SR	0.0621287	0.00295789	21.0044	5.97895e-98	Auloporida			SR^2	0.000854967	3.65274e-05	23.4062	3.69824e-121	Auloporida	+		SR	748784682405981	2.12217e+06	3.52839e+08	0	Auloporida
AIC	3855.65	-	-	-	Auloporida			AIC	3723.4	-	-	-	Auloporida	+		SR^2	1519592256232400	2.12217e+06	7.16056e+08	0	Auloporida
																AIC	125320	-	-	-	Auloporida
Intercept	0.01799	0.0533457	0.337234	0.73594	Bellerophontidae			Intercept	0.436427	0.0368119	11.8556	2.01291e-32	Bellerophontidae			Intercept	0.935687	0.0256178	36.5248	4.47582e-292	Bellerophontidae	-
SR	0.0339106	0.00192298	17.6344	1.34117e-69	Bellerophontidae			SR^2	0.000536872	3.48805e-05	15.3917	1.85946e-53	Bellerophontidae			SR	1.23394	0.0722745	17.073	2.35683e-65	Bellerophontidae	-
AIC	2781.03	-	-	-	Bellerophontidae			AIC	2849.91	-	-	-	Bellerophontidae			SR^2	-0.512869	0.0728982	-7.03542	1.98663e-12	Bellerophontidae	-
																AIC	2734.27	-	-	-	Bellerophontidae	-
Intercept	-446.792	17.3041	-25.82	5.28211e-147	Cystiphyllida	+		Intercept	-223.311	8.64905	-25.8191	5.40696e-147	Cystiphyllida			Intercept	-	-	-	-	Cystiphyllida
SR	8.88306	0.344029	25.8207	5.19903e-147	Cystiphyllida	+		SR^2	0.0882715	0.00341864	25.8207	5.19903e-147	Cystiphyllida			SR	-	-	-	-	Cystiphyllida
AIC	17.671	-	-	-	Cystiphyllida	+		AIC	17.671	-	-	-	Cystiphyllida			SR^2	-	-	-	-	Cystiphyllida
																AIC	-	-	-	-	Cystiphyllida
Intercept	-0.604544	0.055094	-10.973	5.15615e-28	Cystoporida			Intercept	0.0911635	0.0354177	2.57395	0.0100544	Cystoporida			Intercept	0.593233	0.0338162	17.5429	6.74475e-69	Cystoporida	-
SR	0.0366019	0.00200637	18.2428	2.36004e-74	Cystoporida			SR^2	0.000276388	3.2166e-05	8.59256	8.50553e-18	Cystoporida			SR	1.5823	0.0734468	21.5435	6.09031e-103	Cystoporida	-
AIC	3723.9	-	-	-	Cystoporida			AIC	4005.07	-	-	-	Cystoporida			SR^2	-3.93253	0.0935578	-42.0332	0	Cystoporida	-
																AIC	1160	-	-	-	Cystoporida	-
Intercept	63.5166	2.01304	31.5525	1.65534e-218	Desmoceratidae			Intercept	25.1575	0.771497	32.6086	3.09427e-233	Desmoceratidae			Intercept	-1.87064	0.218622	-8.55652	1.16329e-17	Desmoceratidae	+
SR	-3.92367	0.126196	-31.0919	3.0993e-212	Desmoceratidae			SR^2	-0.0952655	0.00298951	-31.8666	7.74895e-223	Desmoceratidae			SR	-5.23988	0.627697	-8.34779	6.95539e-17	Desmoceratidae	+
AIC	267.107	-	-	-	Desmoceratidae			AIC	428.091	-	-	-	Desmoceratidae			SR^2	6.47483	0.445394	14.5373	7.02864e-48	Desmoceratidae	+
																AIC	38.1329	-	-	-	Desmoceratidae	+
Intercept	2.07313	0.0676439	30.6477	2.83883e-206	Euomphalidae			Intercept	1.82154	0.0470713	38.6975	0	Euomphalidae			Intercept	1.49204	0.0340265	43.8494	0	Euomphalidae	-
SR	-0.0251784	0.00223991	-11.2408	2.57012e-29	Euomphalidae			SR^2	-0.000447507	3.5944e-05	-12.4501	1.39647e-35	Euomphalidae			SR	-0.786378	0.074881	-10.5017	8.48385e-26	Euomphalidae	-
AIC	995.918	-	-	-	Euomphalidae			AIC	972.587	-	-	-	Euomphalidae			SR^2	-0.470382	0.0813162	-5.78461	7.26816e-09	Euomphalidae	-
																AIC	964.696	-	-	-	Euomphalidae	-
Intercept	-0.271059	0.0276319	-9.80964	1.02331e-22	Favositida			Intercept	-0.124356	0.0214286	-5.80326	6.5038e-09	Favositida			Intercept	0.102457	0.016512	6.20499	5.47002e-10	Favositida	-
SR	0.014475	0.000874455	16.5532	1.5177e-61	Favositida			SR^2	0.000220488	1.37087e-05	16.0838	3.31163e-58	Favositida			SR	1.06728	0.0644931	16.5488	1.63391e-61	Favositida	-
AIC	4268.55	-	-	-	Favositida			AIC	4283.9	-	-	-	Favositida			SR^2	-0.167238	0.0637718	-2.62244	0.00873025	Favositida	-
																AIC	4263.68	-	-	-	Favositida	-
Intercept	2371432324386810	2.45699e+06	9.65177e+08	0	Fenestrida			Intercept	3171066801960650	1.58022e+06	2.00673e+09	0	Fenestrida			Intercept	-0.618808	0.226373	-2.73358	0.00626501	Fenestrida	-
SR	-164940564864775	153184	-1.07675e+09	0	Fenestrida			SR^2	-10032846731568	4551.65	-2.20422e+09	0	Fenestrida			SR	-6.14637	0.714341	-8.60426	7.68129e-18	Fenestrida	-
AIC	41815.5	-	-	-	Fenestrida			AIC	41815.5	-	-	-	Fenestrida			SR^2	-3.46796	0.312258	-11.1061	1.17202e-28	Fenestrida	-
																AIC	162.75	-	-	-	Fenestrida	-
Intercept	-3.42476	0.11024	-31.0663	6.86884e-212	Lophospiridae			Intercept	-2.89392	0.0776309	-37.278	3.73139e-304	Lophospiridae			Intercept	-2.51798	0.0609447	-41.3158	0	Lophospiridae	-
SR	0.0256853	0.00191655	13.4019	5.89547e-41	Lophospiridae			SR^2	0.00023602	1.86595e-05	12.6487	1.13697e-36	Lophospiridae			SR	1.66781	0.126837	13.1493	1.71864e-39	Lophospiridae	-
AIC	519.58	-	-	-	Lophospiridae			AIC	549.507	-	-	-	Lophospiridae			SR^2	-0.615904	0.115796	-5.31885	1.04424e-07	Lophospiridae	-
																AIC	492.868	-	-	-	Lophospiridae	-
Intercept	0.460541	0.0343918	13.391	6.82313e-41	Orthotetida			Intercept	0.441263	0.0252797	17.4552	3.14243e-68	Orthotetida	-		Intercept	-1504895137029040	588584	-2.55681e+09	0	Orthotetida
SR	-0.0117657	0.0009607	-12.247	1.74354e-34	Orthotetida			SR^2	-0.000267891	1.42162e-05	-18.8441	3.28618e-79	Orthotetida	-		SR	798846720462835	2.12217e+06	3.76429e+08	0	Orthotetida
AIC	5451.45	-	-	-	Orthotetida			AIC	5234.23	-	-	-	Orthotetida	-		SR^2	346466461207099	2.12217e+06	1.63261e+08	0	Orthotetida
																AIC	479539	-	-	-	Orthotetida
Intercept	1.00076	0.0265912	37.6351	0	Orthida	-		Intercept	0.55028	0.019596	28.0812	1.66184e-173	Orthida			Intercept	-0.01534	0.0175476	-0.874193	0.382013	Orthida
SR	-0.0517289	0.0012107	-42.7266	0	Orthida	-		SR^2	-0.000875085	2.16957e-05	-40.3345	0	Orthida			SR	-3.48548	0.0831665	-41.9097	0	Orthida
AIC	2707.2	-	-	-	Orthida	-		AIC	2779.11	-	-	-	Orthida			SR^2	-0.11315	0.0687936	-1.64477	0.100017	Orthida
																AIC	2706.49	-	-	-	Orthida
Intercept	0.125346	0.0450946	2.77963	0.00544206	Productida			Intercept	0.299585	0.0283529	10.5663	4.27036e-26	Productida			Intercept	0.668568	0.0212135	31.5162	5.21471e-218	Productida	+
SR	0.0424631	0.00357266	11.8856	1.40696e-32	Productida			SR^2	0.00193448	0.000131026	14.7641	2.49528e-49	Productida			SR	1.16954	0.0886348	13.195	9.37205e-40	Productida	+
AIC	1284.31	-	-	-	Productida			AIC	1185.24	-	-	-	Productida			SR^2	1.31501	0.0821751	16.0026	1.22599e-57	Productida	+
																AIC	989.366	-	-	-	Productida	+
Intercept	-0.527334	0.0705669	-7.47282	7.84944e-14	Proetidae			Intercept	0.498805	0.0427648	11.6639	1.94883e-31	Proetidae			Intercept	1.29925	0.0357588	36.3337	4.75549e-289	Proetidae	-
SR	0.0701111	0.00310439	22.5845	6.15138e-113	Proetidae			SR^2	0.0008128	5.1214e-05	15.8707	1.01179e-56	Proetidae			SR	1.66223	0.0789276	21.0602	1.84395e-98	Proetidae	-
AIC	862.842	-	-	-	Proetidae			AIC	1204.95	-	-	-	Proetidae			SR^2	-2.24919	0.0851803	-26.405	1.20063e-153	Proetidae	-
																AIC	116.831	-	-	-	Proetidae	-
Intercept	3.0135	0.218597	13.7856	3.11061e-43	Pterineidae			Intercept	1.55723	0.113238	13.7518	4.96625e-43	Pterineidae			Intercept	-0.217511	0.0362318	-6.00333	1.93315e-09	Pterineidae	-
SR	-0.138404	0.00954734	-14.4966	1.2722e-47	Pterineidae			SR^2	-0.00319991	0.000207336	-15.4334	9.75155e-54	Pterineidae			SR	-1.19067	0.0786092	-15.1467	7.96322e-52	Pterineidae	-
AIC	640.109	-	-	-	Pterineidae			AIC	608.243	-	-	-	Pterineidae			SR^2	-1.57005	0.0723262	-21.7078	1.73054e-104	Pterineidae	-
																AIC	116.779	-	-	-	Pterineidae	-
Intercept	-0.861623	0.0492296	-17.5021	1.38011e-68	Rhabdomesida			Intercept	-0.629393	0.0332215	-18.9453	4.82443e-80	Rhabdomesida			Intercept	0.235877	0.0282557	8.34795	6.94601e-17	Rhabdomesida	+
SR	0.0229371	0.00114127	20.0979	7.70438e-90	Rhabdomesida			SR^2	0.000357801	1.43222e-05	24.9823	9.52995e-138	Rhabdomesida			SR	2.53622	0.129485	19.5871	1.99355e-85	Rhabdomesida	+
AIC	6509	-	-	-	Rhabdomesida			AIC	6188.22	-	-	-	Rhabdomesida			SR^2	2.89853	0.123974	23.3802	6.79339e-121	Rhabdomesida	+
																AIC	5477.56	-	-	-	Rhabdomesida	+
Intercept	0.765813	0.0316367	24.2065	1.89966e-129	Spiriferinida	-		Intercept	0.336826	0.0200239	16.8212	1.70672e-63	Spiriferinida			Intercept	-0.0258419	0.015803	-1.63526	0.101995	Spiriferinida
SR	-0.0399138	0.00144419	-27.6375	3.94868e-168	Spiriferinida	-		SR^2	-0.000688275	2.66332e-05	-25.8428	2.93525e-147	Spiriferinida			SR	-1.95542	0.0714422	-27.3706	6.14231e-165	Spiriferinida
AIC	5283.78	-	-	-	Spiriferinida	-		AIC	5336.33	-	-	-	Spiriferinida			SR^2	0.0316262	0.068965	0.458583	0.646534	Spiriferinida
																AIC	5285.57	-	-	-	Spiriferinida
Intercept	-1.84132	0.0353026	-52.158	0	Spiriferida			Intercept	-1.82535	0.0272192	-67.0612	0	Spiriferida			Intercept	-2.28051	0.0398714	-57.1966	0	Spiriferida	+
SR	0.0105297	0.00192193	5.47873	4.2838e-08	Spiriferida			SR^2	0.000353304	3.05238e-05	11.5747	5.53432e-31	Spiriferida			SR	0.227272	0.0692727	3.28084	0.001035	Spiriferida	+
AIC	5719.56	-	-	-	Spiriferida			AIC	5627.46	-	-	-	Spiriferida			SR^2	5.13264	0.156345	32.829	2.2752e-236	Spiriferida	+
																AIC	3957.66	-	-	-	Spiriferida	+
Intercept	-0.276565	0.021182	-13.0566	5.82541e-39	Stauriida			Intercept	-0.18384	0.0152558	-12.0505	1.92879e-33	Stauriida			Intercept	-0.0527846	0.0124813	-4.2291	2.3463e-05	Stauriida	+
SR	0.0111255	0.000855884	12.9989	1.2417e-38	Stauriida			SR^2	0.000212386	1.44429e-05	14.7052	5.96714e-49	Stauriida			SR	0.834036	0.0641399	13.0034	1.17042e-38	Stauriida	+
AIC	9667.89	-	-	-	Stauriida			AIC	9619.23	-	-	-	Stauriida			SR^2	0.730163	0.063666	11.4686	1.89598e-30	Stauriida	+
																AIC	9537.85	-	-	-	Stauriida	+
Intercept	-0.044285	0.0395321	-1.12023	0.262617	Strophomenida			Intercept	-0.0775588	0.0324751	-2.38826	0.0169285	Strophomenida			Intercept	0.048807	0.0272362	1.79199	0.0731348	Strophomenida	+
SR	0.00454405	0.00149646	3.03654	0.00239311	Strophomenida			SR^2	0.000178241	2.8307e-05	6.29669	3.04061e-10	Strophomenida			SR	0.241524	0.068655	3.51794	0.000434915	Strophomenida	+
AIC	1847.06	-	-	-	Strophomenida			AIC	1816.32	-	-	-	Strophomenida			SR^2	1.58883	0.0688676	23.0708	9.09815e-118	Strophomenida	+
																AIC	1270.02	-	-	-	Strophomenida	+
Intercept	-0.0187509	0.0364147	-0.514927	0.606604	Trepostomida			Intercept	0.195077	0.0262613	7.42828	1.10017e-13	Trepostomida			Intercept	1.78962	0.0924023	19.3677	1.44574e-83	Trepostomida	+
SR	0.0248308	0.00127901	19.4141	5.87116e-84	Trepostomida			SR^2	0.000471267	2.37756e-05	19.8214	1.94442e-87	Trepostomida			SR	10.8997	0.723631	15.0625	2.85653e-51	Trepostomida	+
AIC	7087.71	-	-	-	Trepostomida			AIC	6790.89	-	-	-	Trepostomida			SR^2	6.64891	0.421216	15.7851	3.94316e-56	Trepostomida	+
																AIC	6344.91	-	-	-	Trepostomida	+

## Sheet: Sheet1
	Estimate	Std..Error	z.value	Pr...z..	CLADE
Intercept	2.56656	0.0863019	29.7393	2.38405e-194	athy_total
SR	-5.21433	0.199841	-26.0925	4.43805e-150
SR^2	3.30381	0.149255	22.1353	1.44409e-108
AIC	755.068	NA	NA	NA	athy_total
Intercept	-325584725506449	802104	-4.05913e+08	0	aulo_total
SR	748784682405981	2.12217e+06	3.52839e+08	0
SR^2	1519592256232400	2.12217e+06	7.16056e+08	0
AIC	125320	NA	NA	NA	aulo_total
Intercept	0.935687	0.0256178	36.5248	4.47582e-292	belle_total
SR	1.23394	0.0722745	17.073	2.35683e-65
SR^2	-0.512869	0.0728982	-7.03542	1.98663e-12
AIC	2734.27	NA	NA	NA	belle_total
Intercept	-446.792	17.3041	-25.82	5.28211e-147	cisty_total
SR	8.88306	0.344029	25.8207	5.19903e-147	cisty_total
AIC	17.671	NA	NA	NA	cisty_total
Intercept	0.593233	0.0338162	17.5429	6.74475e-69	cys_total
SR	1.5823	0.0734468	21.5435	6.09031e-103
SR^2	-3.93253	0.0935578	-42.0332	0
AIC	1160	NA	NA	NA	cys_total
Intercept	-1.87064	0.218622	-8.55652	1.16329e-17	desmo_total
SR	-5.23988	0.627697	-8.34779	6.95539e-17
SR^2	6.47483	0.445394	14.5373	7.02864e-48
AIC	38.1329	NA	NA	NA	desmo_total
Intercept	1.49204	0.0340265	43.8494	0	euo_total
SR	-0.786378	0.074881	-10.5017	8.48385e-26
SR^2	-0.470382	0.0813162	-5.78461	7.26816e-09
AIC	964.696	NA	NA	NA	euo_total
Intercept	0.102457	0.016512	6.20499	5.47002e-10	favo_total
SR	1.06728	0.0644931	16.5488	1.63391e-61
SR^2	-0.167238	0.0637718	-2.62244	0.00873025
AIC	4263.68	NA	NA	NA	favo_total
Intercept	-0.618808	0.226373	-2.73358	0.00626501	fene_total
SR	-6.14637	0.714341	-8.60426	7.68129e-18
SR^2	-3.46796	0.312258	-11.1061	1.17202e-28
AIC	162.75	NA	NA	NA	fene_total
Intercept	-2.51798	0.0609447	-41.3158	0	loph_total
SR	1.66781	0.126837	13.1493	1.71864e-39
SR^2	-0.615904	0.115796	-5.31885	1.04424e-07
AIC	492.868	NA	NA	NA	loph_total
Intercept	-1504895137029040	588584	-2.55681e+09	0	ort_total
SR	798846720462835	2.12217e+06	3.76429e+08	0
SR^2	346466461207099	2.12217e+06	1.63261e+08	0
AIC	479539	NA	NA	NA	ort_total
Intercept	-0.01534	0.0175476	-0.874193	0.382013	orth_total
SR	-3.48548	0.0831665	-41.9097	0
SR^2	-0.11315	0.0687936	-1.64477	0.100017
AIC	2706.49	NA	NA	NA	orth_total
Intercept	0.668568	0.0212135	31.5162	5.21471e-218	pro_total
SR	1.16954	0.0886348	13.195	9.37205e-40
SR^2	1.31501	0.0821751	16.0026	1.22599e-57
AIC	989.366	NA	NA	NA	pro_total
Intercept	1.29925	0.0357588	36.3337	4.75549e-289	proeti_total
SR	1.66223	0.0789276	21.0602	1.84395e-98
SR^2	-2.24919	0.0851803	-26.405	1.20063e-153
AIC	116.831	NA	NA	NA	proeti_total
Intercept	-0.217511	0.0362318	-6.00333	1.93315e-09	pter_total
SR	-1.19067	0.0786092	-15.1467	7.96322e-52
SR^2	-1.57005	0.0723262	-21.7078	1.73054e-104
AIC	116.779	NA	NA	NA	pter_total
Intercept	0.235877	0.0282557	8.34795	6.94601e-17	rha_total
SR	2.53622	0.129485	19.5871	1.99355e-85
SR^2	2.89853	0.123974	23.3802	6.79339e-121
AIC	5477.56	NA	NA	NA	rha_total
Intercept	-0.0258419	0.015803	-1.63526	0.101995	spiri_total
SR	-1.95542	0.0714422	-27.3706	6.14231e-165
SR^2	0.0316262	0.068965	0.458583	0.646534
AIC	5285.57	NA	NA	NA	spiri_total
Intercept	-2.28051	0.0398714	-57.1966	0	spirif_total
SR	0.227272	0.0692727	3.28084	0.001035
SR^2	5.13264	0.156345	32.829	2.2752e-236
AIC	3957.66	NA	NA	NA	spirif_total
Intercept	-0.0527846	0.0124813	-4.2291	2.3463e-05	stau_total
SR	0.834036	0.0641399	13.0034	1.17042e-38
SR^2	0.730163	0.063666	11.4686	1.89598e-30
AIC	9537.85	NA	NA	NA	stau_total
Intercept	0.048807	0.0272362	1.79199	0.0731348	stro_total
SR	0.241524	0.068655	3.51794	0.000434915
SR^2	1.58883	0.0688676	23.0708	9.09815e-118
AIC	1270.02	NA	NA	NA	stro_total
Intercept	1.78962	0.0924023	19.3677	1.44574e-83	trepo_total
SR	10.8997	0.723631	15.0625	2.85653e-51
SR^2	6.64891	0.421216	15.7851	3.94316e-56
AIC	6344.91	NA	NA	NA	trepo_total
